# Supplementary material for: Electro-organic reactions. Part 51.† Reactivity and stereochemical pathways for cathodically generated radical-anions of α,β-unsaturated ketones in aqueous media
Source: Royal Society of Chemistry journal article supplement (doi:10.1039/a908657i), 2000-01-01
Supplement: a908657i1.doc [file a908657i1.doc]

**Supplementary Data**

**Electro-organic reactions. Part 51. Reactivity and stereochemical pathways for cathodically generated radical-anions of -unsaturated ketones in aqueous media**

# James H. P. Utley,* Carmen Z. Smith and Majid Motevalli

## Department of Chemistry, Queen Mary and Westfield College (University of London), Mile End Road, London, UK E1 4NS

**Table S1** Observed and calculated structure factors for cs2-13f1 Page 1

h k l 10Fo 10Fc 10s h k l 10Fo 10Fc 10s h k l 10Fo 10Fc 10s h k l 10Fo 10Fc 10s h k l 10Fo 10Fc 10s

4 0 0 287 275 1 17 4 0 0 3 1 -22 2 1 15 0 14 -11 4 1 0 0 1 -22 1 2 12 14 12

6 0 0 141 143 1 18 4 0 20 7 20 -21 2 1 0 11 1 -10 4 1 0 2 1 -21 1 2 0 28 1

8 0 0 98 92 1 1 5 0 48 44 15 -20 2 1 25 20 24 -9 4 1 19 5 18 -20 1 2 12 13 11

10 0 0 304 298 2 2 5 0 16 1 15 -19 2 1 12 9 11 -8 4 1 24 2 23 -19 1 2 27 25 12

12 0 0 0 17 1 3 5 0 32 21 7 -18 2 1 17 22 16 -7 4 1 56 63 4 -18 1 2 0 8 1

14 0 0 131 135 1 4 5 0 67 75 3 -17 2 1 16 9 16 -6 4 1 0 3 1 -17 1 2 0 4 1

16 0 0 57 61 3 5 5 0 0 10 1 -16 2 1 0 18 1 -5 4 1 0 3 1 -16 1 2 0 15 1

18 0 0 60 54 6 6 5 0 24 17 24 -15 2 1 24 17 23 -4 4 1 30 14 30 -15 1 2 0 7 1

20 0 0 0 16 1 7 5 0 43 39 4 -14 2 1 21 16 12 -3 4 1 22 30 12 -14 1 2 0 11 1

22 0 0 49 36 11 8 5 0 0 8 1 -13 2 1 14 1 13 -2 4 1 45 51 5 -13 1 2 0 19 1

1 1 0 160 155 1 9 5 0 44 48 14 -12 2 1 0 19 1 -1 4 1 20 49 19 -12 1 2 49 45 4

2 1 0 118 118 1 10 5 0 16 15 16 -11 2 1 18 22 18 0 4 1 0 11 1 -11 1 2 39 33 4

3 1 0 83 79 2 11 5 0 26 30 26 -10 2 1 0 11 1 1 4 1 49 53 4 -10 1 2 0 0 1

4 1 0 84 95 1 12 5 0 0 25 1 -9 2 1 0 14 1 2 4 1 20 26 19 -9 1 2 0 9 1

5 1 0 114 113 1 13 5 0 0 1 1 -8 2 1 54 53 3 3 4 1 28 26 28 -8 1 2 57 57 3

6 1 0 0 21 1 14 5 0 0 13 1 -7 2 1 11 10 11 4 4 1 9 4 9 -7 1 2 84 76 2

7 1 0 19 16 11 0 6 0 89 92 4 -6 2 1 113 114 2 5 4 1 18 20 17 -6 1 2 39 52 4

8 1 0 0 16 1 1 6 0 67 68 3 -5 2 1 99 89 2 6 4 1 21 44 20 -5 1 2 133 137 1

9 1 0 45 53 3 2 6 0 0 12 1 -4 2 1 13 22 12 7 4 1 38 40 6 -4 1 2 141 145 2

10 1 0 0 4 1 3 6 0 28 28 11 -3 2 1 58 54 3 8 4 1 27 26 9 -3 1 2 78 76 2

11 1 0 155 163 1 4 6 0 40 26 12 -2 2 1 27 1 26 9 4 1 0 13 1 -2 1 2 71 78 2

12 1 0 24 14 7 5 6 0 0 7 1 -1 2 1 0 22 1 10 4 1 41 32 5 -1 1 2 109 99 1

13 1 0 43 39 13 6 6 0 0 17 1 0 2 1 62 61 3 11 4 1 8 3 7 0 1 2 54 55 3

14 1 0 35 30 4 -23 0 1 22 11 22 1 2 1 52 61 3 12 4 1 0 22 1 1 1 2 344 318 2

15 1 0 0 2 1 -21 0 1 0 14 1 2 2 1 87 92 2 13 4 1 33 22 8 2 1 2 154 151 2

16 1 0 11 8 10 -19 0 1 0 11 1 3 2 1 40 41 4 14 4 1 0 7 1 3 1 2 0 5 1

17 1 0 43 30 4 -17 0 1 0 8 1 4 2 1 65 64 3 15 4 1 27 19 27 4 1 2 68 66 2

18 1 0 37 31 6 -15 0 1 51 48 4 5 2 1 38 42 5 16 4 1 36 10 6 5 1 2 181 182 2

19 1 0 7 1 6 -13 0 1 12 12 12 6 2 1 49 56 4 17 4 1 22 5 22 6 1 2 67 58 3

20 1 0 0 4 1 -11 0 1 23 28 8 7 2 1 0 8 1 -14 5 1 36 15 8 7 1 2 157 161 2

21 1 0 9 19 9 -9 0 1 154 144 2 8 2 1 24 20 23 -13 5 1 44 22 6 8 1 2 31 32 5

22 1 0 10 1 9 -7 0 1 0 10 1 9 2 1 19 19 13 -12 5 1 28 17 28 9 1 2 87 82 2

23 1 0 0 1 1 -5 0 1 187 182 2 10 2 1 31 27 6 -11 5 1 13 18 13 10 1 2 42 45 4

0 2 0 122 108 2 -3 0 1 91 88 1 11 2 1 27 26 8 -10 5 1 0 20 1 11 1 2 0 28 1

1 2 0 0 6 1 1 0 1 30 31 1 12 2 1 26 17 7 -9 5 1 0 22 1 12 1 2 16 1 15

2 2 0 21 17 20 3 0 1 105 105 1 13 2 1 0 9 1 -8 5 1 39 30 6 13 1 2 0 4 1

3 2 0 14 39 14 5 0 1 93 79 2 14 2 1 42 41 5 -7 5 1 0 10 1 14 1 2 14 25 13

4 2 0 7 5 6 7 0 1 0 5 1 15 2 1 0 11 1 -6 5 1 28 8 28 15 1 2 10 25 10

5 2 0 0 6 1 9 0 1 81 85 2 16 2 1 27 18 26 -5 5 1 0 25 1 16 1 2 21 5 20

6 2 0 80 71 2 11 0 1 8 14 8 17 2 1 13 20 13 -4 5 1 0 5 1 17 1 2 24 37 24

7 2 0 82 84 2 13 0 1 24 20 23 18 2 1 0 5 1 -3 5 1 0 28 1 18 1 2 0 24 1

8 2 0 43 37 6 15 0 1 58 51 4 19 2 1 29 22 29 -2 5 1 11 14 11 19 1 2 28 12 11

9 2 0 78 81 2 17 0 1 29 15 7 20 2 1 30 8 9 -1 5 1 82 92 4 20 1 2 0 10 1

10 2 0 98 95 4 19 0 1 37 33 6 21 2 1 0 1 1 0 5 1 68 67 4 21 1 2 31 11 8

11 2 0 0 0 1 21 0 1 33 17 6 22 2 1 19 8 18 1 5 1 58 66 5 22 1 2 0 11 1

12 2 0 60 63 2 23 0 1 0 3 1 -20 3 1 24 12 14 2 5 1 35 39 9 -22 2 2 0 14 1

13 2 0 0 1 1 -23 1 1 22 15 21 -19 3 1 0 6 1 3 5 1 0 31 1 -21 2 2 18 2 18

14 2 0 63 70 3 -22 1 1 0 1 1 -18 3 1 0 10 1 4 5 1 28 24 27 -20 2 2 37 24 7

15 2 0 0 6 1 -21 1 1 21 1 21 -17 3 1 20 24 20 5 5 1 30 52 30 -19 2 2 0 2 1

16 2 0 96 104 2 -20 1 1 24 16 23 -16 3 1 0 28 1 6 5 1 47 44 6 -18 2 2 37 6 6

17 2 0 25 32 25 -19 1 1 31 26 8 -15 3 1 0 16 1 7 5 1 44 38 6 -17 2 2 25 20 25

18 2 0 26 26 26 -18 1 1 0 1 1 -14 3 1 60 55 4 8 5 1 0 9 1 -16 2 2 104 103 3

19 2 0 8 14 8 -17 1 1 0 16 1 -13 3 1 11 1 10 9 5 1 48 42 5 -15 2 2 28 28 27

20 2 0 14 9 14 -16 1 1 23 8 23 -12 3 1 40 31 5 10 5 1 35 37 8 -14 2 2 86 96 3

21 2 0 22 6 22 -15 1 1 17 5 17 -11 3 1 47 40 4 11 5 1 0 11 1 -13 2 2 17 38 17

22 2 0 0 7 1 -14 1 1 0 0 1 -10 3 1 14 7 14 12 5 1 0 24 1 -12 2 2 0 2 1

1 3 0 58 55 2 -13 1 1 51 51 4 -9 3 1 0 1 1 13 5 1 13 3 12 -11 2 2 37 24 5

2 3 0 7 9 7 -12 1 1 56 48 3 -8 3 1 23 7 22 -6 6 1 22 10 22 -10 2 2 15 10 15

3 3 0 44 46 3 -11 1 1 46 41 4 -7 3 1 0 2 1 -5 6 1 22 14 22 -9 2 2 47 45 4

4 3 0 29 21 23 -10 1 1 40 48 5 -6 3 1 44 32 4 -4 6 1 19 12 18 -8 2 2 51 57 4

5 3 0 190 191 2 -9 1 1 57 57 3 -5 3 1 15 14 15 -3 6 1 0 5 1 -7 2 2 25 19 8

6 3 0 42 42 3 -8 1 1 73 80 3 -4 3 1 12 7 12 -2 6 1 0 20 1 -6 2 2 83 93 2

7 3 0 59 65 2 -7 1 1 177 180 2 -3 3 1 31 26 6 -1 6 1 34 39 33 -5 2 2 10 11 9

8 3 0 14 22 13 -6 1 1 66 71 3 -2 3 1 15 45 14 0 6 1 22 2 22 -4 2 2 172 167 2

9 3 0 0 23 1 -5 1 1 32 38 6 -1 3 1 38 39 5 1 6 1 0 13 1 -3 2 2 0 22 1

10 3 0 33 36 4 -4 1 1 39 42 5 0 3 1 0 29 1 2 6 1 26 5 25 -2 2 2 17 24 17

11 3 0 22 45 21 -3 1 1 42 38 4 1 3 1 0 2 1 3 6 1 22 2 22 -1 2 2 59 58 3

12 3 0 0 5 1 -2 1 1 0 12 1 2 3 1 54 55 3 4 6 1 31 12 31 0 2 2 79 83 2

13 3 0 48 47 3 -1 1 1 183 177 2 3 3 1 21 28 20 5 6 1 0 3 1 1 2 2 67 66 3

14 3 0 17 10 17 0 1 1 0 7 1 4 3 1 0 34 1 6 6 1 22 22 22 2 2 2 137 134 2

15 3 0 100 103 2 1 1 1 170 162 2 5 3 1 17 5 17 -22 0 2 22 28 21 3 2 2 55 56 3

16 3 0 0 10 1 2 1 1 105 98 1 6 3 1 0 23 1 -20 0 2 0 39 1 4 2 2 60 54 3

17 3 0 62 55 4 3 1 1 391 362 2 7 3 1 20 20 20 -18 0 2 24 11 14 5 2 2 25 7 25

18 3 0 24 25 14 4 1 1 102 102 2 8 3 1 0 12 1 -16 0 2 0 20 1 6 2 2 133 137 2

19 3 0 0 0 1 5 1 1 291 289 3 9 3 1 59 57 4 -14 0 2 0 19 1 7 2 2 69 64 3

20 3 0 0 1 1 6 1 1 61 76 3 10 3 1 20 26 19 -12 0 2 36 31 5 8 2 2 58 65 3

0 4 0 44 33 5 7 1 1 42 36 4 11 3 1 0 24 1 -10 0 2 136 128 2 9 2 2 0 3 1

1 4 0 12 25 12 8 1 1 88 88 2 12 3 1 37 44 6 -8 0 2 43 53 4 10 2 2 104 113 2

2 4 0 60 61 6 9 1 1 0 1 1 13 3 1 28 30 28 -6 0 2 132 132 2 11 2 2 36 30 5

3 4 0 27 14 15 10 1 1 58 59 3 14 3 1 16 36 15 -4 0 2 116 110 1 12 2 2 43 46 4

4 4 0 70 69 5 11 1 1 20 30 14 15 3 1 0 5 1 -2 0 2 58 56 2 13 2 2 14 4 14

5 4 0 29 24 29 12 1 1 33 25 6 16 3 1 28 14 9 2 0 2 115 103 1 14 2 2 0 13 1

6 4 0 66 75 2 13 1 1 113 113 2 17 3 1 27 6 26 4 0 2 152 149 2 15 2 2 0 17 1

7 4 0 47 62 6 14 1 1 0 0 1 18 3 1 12 17 12 6 0 2 353 352 3 16 2 2 62 66 4

8 4 0 38 45 4 15 1 1 14 21 14 19 3 1 0 17 1 8 0 2 145 136 2 17 2 2 24 22 16

9 4 0 27 24 17 16 1 1 0 5 1 20 3 1 0 13 1 10 0 2 138 135 2 18 2 2 30 28 10

10 4 0 20 0 13 17 1 1 45 46 5 -18 4 1 27 21 14 12 0 2 49 50 4 19 2 2 21 18 20

11 4 0 16 17 15 18 1 1 0 5 1 -17 4 1 22 7 21 14 0 2 88 82 2 20 2 2 0 5 1

12 4 0 19 36 19 19 1 1 0 2 1 -16 4 1 0 4 1 16 0 2 52 41 4 21 2 2 0 4 1

13 4 0 25 29 24 20 1 1 0 12 1 -15 4 1 0 15 1 18 0 2 29 13 29 -20 3 2 0 3 1

14 4 0 31 31 8 21 1 1 28 4 27 -14 4 1 0 1 1 20 0 2 45 30 6 -19 3 2 16 3 15

15 4 0 0 14 1 22 1 1 0 11 1 -13 4 1 0 5 1 22 0 2 38 48 8 -18 3 2 0 7 1

16 4 0 3 2 3 23 1 1 26 17 26 -12 4 1 24 25 12 -23 1 2 0 1 1 -17 3 2 29 26 29

Observed and calculated structure factors for cs2-13f1 Page 2

h k l 10Fo 10Fc 10s h k l 10Fo 10Fc 10s h k l 10Fo 10Fc 10s h k l 10Fo 10Fc 10s h k l 10Fo 10Fc 10s

-16 3 2 20 29 19 9 5 2 24 13 24 -16 2 3 0 1 1 -4 4 3 18 26 18 -15 1 4 9 6 9

-15 3 2 90 83 3 10 5 2 30 45 29 -15 2 3 11 14 11 -3 4 3 14 10 14 -14 1 4 36 40 6

-14 3 2 29 35 28 11 5 2 0 16 1 -14 2 3 23 33 22 -2 4 3 31 47 31 -13 1 4 46 38 4

-13 3 2 0 7 1 12 5 2 34 34 8 -13 2 3 28 32 28 -1 4 3 22 24 22 -12 1 4 59 62 3

-12 3 2 0 18 1 13 5 2 26 13 25 -12 2 3 40 33 4 0 4 3 0 8 1 -11 1 4 0 3 1

-11 3 2 47 52 4 -6 6 2 0 2 1 -11 2 3 0 20 1 1 4 3 0 31 1 -10 1 4 22 22 21

-10 3 2 24 33 24 -5 6 2 0 14 1 -10 2 3 0 23 1 2 4 3 48 65 5 -9 1 4 8 40 7

-9 3 2 44 40 4 -4 6 2 0 17 1 -9 2 3 0 21 1 3 4 3 68 63 3 -8 1 4 27 34 7

-8 3 2 0 10 1 -3 6 2 0 1 1 -8 2 3 0 8 1 4 4 3 29 26 8 -7 1 4 54 41 3

-7 3 2 31 9 5 -2 6 2 25 24 14 -7 2 3 61 58 3 5 4 3 0 35 1 -6 1 4 58 70 3

-6 3 2 26 30 9 -1 6 2 0 19 1 -6 2 3 45 40 4 6 4 3 50 55 4 -5 1 4 50 56 3

-5 3 2 90 85 2 0 6 2 0 21 1 -5 2 3 87 84 2 7 4 3 37 45 7 -4 1 4 162 166 2

-4 3 2 101 100 2 1 6 2 22 43 22 -4 2 3 0 4 1 8 4 3 30 28 9 -3 1 4 262 254 3

-3 3 2 38 39 5 2 6 2 0 7 1 -3 2 3 17 20 17 9 4 3 0 21 1 -2 1 4 55 59 3

-2 3 2 19 20 18 3 6 2 27 22 13 -2 2 3 95 92 2 10 4 3 43 39 5 -1 1 4 177 161 2

-1 3 2 68 64 3 4 6 2 34 37 34 -1 2 3 29 28 7 11 4 3 0 9 1 0 1 4 55 57 3

0 3 2 26 30 25 5 6 2 35 41 10 0 2 3 65 70 3 12 4 3 0 16 1 1 1 4 56 55 3

1 3 2 0 5 1 6 6 2 26 15 16 1 2 3 32 46 6 13 4 3 22 14 21 2 1 4 0 7 1

2 3 2 115 50 13 -23 0 3 0 4 1 2 2 3 136 132 2 14 4 3 0 10 1 3 1 4 198 188 3

3 3 2 305 122 7 -21 0 3 19 12 19 3 2 3 0 1 1 15 4 3 0 19 1 4 1 4 29 16 6

4 3 2 48 4 48 -19 0 3 0 30 1 4 2 3 13 2 13 16 4 3 28 21 28 5 1 4 169 168 2

5 3 2 0 14 1 -17 0 3 0 12 1 5 2 3 0 6 1 17 4 3 9 15 9 6 1 4 0 6 1

6 3 2 56 8 56 -15 0 3 0 29 1 6 2 3 121 118 2 -14 5 3 0 5 1 7 1 4 70 73 3

7 3 2 128 52 13 -13 0 3 0 10 1 7 2 3 30 15 5 -13 5 3 18 5 18 8 1 4 34 34 5

8 3 2 82 27 19 -11 0 3 76 80 2 8 2 3 0 10 1 -12 5 3 0 3 1 9 1 4 70 63 2

9 3 2 0 5 1 -9 0 3 83 81 2 9 2 3 9 6 8 -11 5 3 28 6 27 10 1 4 62 78 3

10 3 2 0 12 1 -7 0 3 122 127 2 10 2 3 62 71 3 -10 5 3 0 2 1 11 1 4 20 42 19

11 3 2 0 22 1 -5 0 3 102 105 2 11 2 3 48 48 4 -9 5 3 27 28 26 12 1 4 18 17 18

12 3 2 74 27 28 -3 0 3 24 23 24 12 2 3 22 20 10 -8 5 3 40 27 6 13 1 4 0 35 1

13 3 2 86 60 25 -1 0 3 16 12 15 13 2 3 30 44 8 -7 5 3 20 21 20 14 1 4 14 12 14

14 3 2 0 18 1 1 0 3 33 34 4 14 2 3 0 12 1 -6 5 3 20 8 20 15 1 4 0 17 1

15 3 2 45 25 44 3 0 3 69 70 2 15 2 3 28 20 8 -5 5 3 36 28 7 16 1 4 18 9 18

16 3 2 73 28 72 5 0 3 0 27 1 16 2 3 16 16 15 -4 5 3 36 22 7 17 1 4 36 17 6

19 3 2 50 20 49 7 0 3 20 31 20 17 2 3 0 6 1 -3 5 3 25 7 25 18 1 4 23 27 22

20 3 2 72 15 71 9 0 3 26 28 7 18 2 3 0 10 1 -2 5 3 16 37 16 19 1 4 0 0 1

-17 4 2 25 1 25 11 0 3 51 59 3 19 2 3 30 4 8 -1 5 3 0 0 1 20 1 4 0 1 1

-16 4 2 0 21 1 13 0 3 41 52 5 20 2 3 0 1 1 0 5 3 26 38 25 21 1 4 13 22 12

-15 4 2 6 5 5 15 0 3 44 38 5 21 2 3 0 4 1 1 5 3 0 13 1 22 1 4 0 0 1

-14 4 2 0 20 1 17 0 3 30 12 30 -20 3 3 0 13 1 2 5 3 28 25 27 -22 2 4 26 11 26

-13 4 2 0 11 1 19 0 3 0 11 1 -19 3 3 49 13 49 3 5 3 30 2 30 -21 2 4 0 20 1

-12 4 2 16 22 16 21 0 3 12 6 12 -18 3 3 0 5 1 4 5 3 28 31 28 -20 2 4 8 5 8

-11 4 2 0 22 1 23 0 3 18 6 18 -17 3 3 57 2 57 5 5 3 0 1 1 -19 2 4 37 37 7

-10 4 2 0 26 1 -23 1 3 0 1 1 -16 3 3 0 5 1 6 5 3 0 14 1 -18 2 4 58 57 5

-9 4 2 11 9 10 -22 1 3 22 0 21 -15 3 3 0 11 1 7 5 3 23 13 18 -17 2 4 41 44 5

-8 4 2 38 49 7 -21 1 3 18 5 17 -14 3 3 0 19 1 8 5 3 0 40 1 -16 2 4 29 13 29

-7 4 2 15 33 14 -20 1 3 0 0 1 -13 3 3 0 23 1 9 5 3 0 33 1 -15 2 4 0 12 1

-6 4 2 0 4 1 -19 1 3 29 12 8 -12 3 3 50 2 50 10 5 3 12 7 12 -14 2 4 10 2 10

-5 4 2 14 14 14 -18 1 3 0 9 1 -11 3 3 0 5 1 11 5 3 12 15 12 -13 2 4 0 1 1

-4 4 2 50 53 5 -17 1 3 0 9 1 -10 3 3 100 38 16 12 5 3 0 3 1 -12 2 4 0 34 1

-3 4 2 36 41 6 -16 1 3 15 5 14 -9 3 3 54 8 42 13 5 3 13 7 13 -11 2 4 25 5 24

-2 4 2 14 5 14 -15 1 3 8 10 7 -8 3 3 0 18 1 -6 6 3 18 4 18 -10 2 4 18 29 18

-1 4 2 10 16 10 -14 1 3 0 11 1 -7 3 3 73 9 20 -5 6 3 0 16 1 -9 2 4 21 8 21

0 4 2 41 44 5 -13 1 3 16 10 16 -6 3 3 222 85 8 -4 6 3 0 21 1 -8 2 4 149 149 2

1 4 2 68 83 3 -12 1 3 60 49 3 -5 3 3 74 2 73 -3 6 3 29 7 29 -7 2 4 57 55 3

2 4 2 38 33 5 -11 1 3 47 52 4 -4 3 3 164 62 10 -2 6 3 0 12 1 -6 2 4 26 16 26

3 4 2 18 10 17 -10 1 3 50 51 4 -3 3 3 41 12 41 -1 6 3 0 12 1 -5 2 4 17 12 16

4 4 2 0 26 1 -9 1 3 59 62 3 -2 3 3 0 33 1 0 6 3 33 21 11 -4 2 4 19 6 12

5 4 2 0 22 1 -8 1 3 88 85 2 -1 3 3 0 11 1 1 6 3 45 28 6 -3 2 4 16 19 16

6 4 2 0 0 1 -7 1 3 49 59 4 0 3 3 79 32 78 2 6 3 0 10 1 -2 2 4 152 149 2

7 4 2 25 32 13 -6 1 3 73 80 2 1 3 3 63 13 62 3 6 3 36 8 8 -1 2 4 121 123 2

8 4 2 15 20 14 -5 1 3 88 84 2 2 3 3 57 21 30 4 6 3 0 14 1 0 2 4 39 36 4

9 4 2 27 32 11 -4 1 3 0 19 1 3 3 3 155 58 10 5 6 3 0 46 1 1 2 4 37 36 5

10 4 2 0 20 1 -3 1 3 136 134 2 4 3 3 122 36 12 -22 0 4 18 22 18 2 2 4 110 109 2

11 4 2 28 25 10 -2 1 3 50 55 3 5 3 3 73 29 22 -20 0 4 0 26 1 3 2 4 23 22 9

12 4 2 62 63 4 -1 1 3 132 125 1 6 3 3 36 53 35 -18 0 4 15 5 15 4 2 4 237 234 3

13 4 2 0 7 1 0 1 3 99 108 2 7 3 3 52 24 51 -16 0 4 23 11 22 5 2 4 58 53 3

14 4 2 29 18 29 1 1 3 46 58 4 8 3 3 0 3 1 -14 0 4 0 4 1 6 2 4 72 64 3

15 4 2 21 36 21 2 1 3 16 1 15 9 3 3 31 2 30 -12 0 4 59 61 3 7 2 4 70 68 3

16 4 2 19 11 19 3 1 3 106 101 2 10 3 3 78 16 20 -10 0 4 102 108 2 8 2 4 36 31 5

17 4 2 29 6 28 4 1 3 54 62 3 11 3 3 0 33 1 -8 0 4 159 168 2 9 2 4 28 27 6

-14 5 2 0 10 1 5 1 3 67 70 2 12 3 3 41 32 41 -6 0 4 149 145 2 10 2 4 27 16 26

-13 5 2 18 13 18 6 1 3 89 92 2 13 3 3 61 25 34 -4 0 4 46 45 4 11 2 4 60 61 3

-12 5 2 25 18 25 7 1 3 0 27 1 14 3 3 0 20 1 -2 0 4 131 119 2 12 2 4 43 38 5

-11 5 2 23 4 17 8 1 3 51 54 3 15 3 3 0 4 1 0 0 4 93 86 1 13 2 4 0 20 1

-10 5 2 0 10 1 9 1 3 85 90 2 16 3 3 41 14 41 2 0 4 246 242 2 14 2 4 73 69 4

-9 5 2 54 44 5 10 1 3 83 79 2 17 3 3 0 1 1 4 0 4 282 273 3 15 2 4 0 19 1

-8 5 2 0 23 1 11 1 3 64 61 3 18 3 3 0 8 1 6 0 4 269 276 3 16 2 4 23 31 23

-7 5 2 0 10 1 12 1 3 0 26 1 19 3 3 0 29 1 8 0 4 268 264 3 17 2 4 24 3 23

-6 5 2 14 1 13 13 1 3 0 6 1 20 3 3 81 8 80 10 0 4 0 21 1 18 2 4 0 6 1

-5 5 2 0 17 1 14 1 3 0 10 1 -18 4 3 41 4 6 12 0 4 13 10 12 20 2 4 29 26 28

-4 5 2 63 70 5 15 1 3 20 17 20 -17 4 3 0 18 1 14 0 4 38 41 5 21 2 4 0 1 1

-3 5 2 20 5 19 16 1 3 18 16 18 -16 4 3 0 17 1 16 0 4 97 98 3 -20 3 4 0 9 1

-2 5 2 23 26 22 17 1 3 35 36 7 -15 4 3 0 9 1 18 0 4 55 60 5 -19 3 4 0 1 1

-1 5 2 0 10 1 18 1 3 0 9 1 -14 4 3 0 7 1 20 0 4 17 10 16 -18 3 4 90 19 89

0 5 2 20 16 19 19 1 3 0 18 1 -13 4 3 0 13 1 22 0 4 0 11 1 -17 3 4 0 46 1

1 5 2 119 131 3 20 1 3 17 2 17 -12 4 3 0 7 1 -23 1 4 0 3 1 -16 3 4 66 1 36

2 5 2 104 102 3 22 1 3 0 3 1 -11 4 3 0 16 1 -22 1 4 0 4 1 -15 3 4 86 49 25

3 5 2 30 36 30 -22 2 3 32 14 31 -10 4 3 16 38 15 -21 1 4 28 15 9 -14 3 4 0 32 1

4 5 2 23 26 22 -21 2 3 28 13 28 -9 4 3 28 25 28 -20 1 4 0 2 1 -13 3 4 0 46 1

5 5 2 0 11 1 -20 2 3 21 1 21 -8 4 3 15 0 15 -19 1 4 0 7 1 -12 3 4 0 9 1

6 5 2 0 18 1 -19 2 3 29 32 29 -7 4 3 40 44 6 -18 1 4 25 25 12 -11 3 4 47 21 47

7 5 2 48 51 6 -18 2 3 16 2 16 -6 4 3 12 16 11 -17 1 4 0 3 1 -10 3 4 62 22 61

8 5 2 29 46 29 -17 2 3 32 29 8 -5 4 3 0 22 1 -16 1 4 0 14 1 -9 3 4 107 29 15

Observed and calculated structure factors for cs2-13f1 Page 3

h k l 10Fo 10Fc 10s h k l 10Fo 10Fc 10s h k l 10Fo 10Fc 10s h k l 10Fo 10Fc 10s h k l 10Fo 10Fc 10s

-8 3 4 0 8 1 -5 6 4 0 17 1 -8 2 5 59 46 3 7 4 5 0 4 1 2 1 6 31 23 6

-7 3 4 0 5 1 -3 6 4 13 23 13 -7 2 5 19 9 18 8 4 5 13 9 12 3 1 6 36 17 4

-6 3 4 134 41 11 -2 6 4 0 5 1 -6 2 5 63 67 3 9 4 5 78 81 3 4 1 6 94 89 2

-5 3 4 184 64 9 -1 6 4 0 14 1 -5 2 5 25 28 25 10 4 5 41 47 6 5 1 6 97 94 2

-4 3 4 0 38 1 0 6 4 0 15 1 -4 2 5 83 72 2 11 4 5 0 5 1 6 1 6 79 71 2

-3 3 4 0 3 1 1 6 4 18 10 18 -3 2 5 43 36 4 12 4 5 17 13 16 7 1 6 0 27 1

-2 3 4 59 9 58 2 6 4 0 28 1 -2 2 5 61 64 3 13 4 5 55 45 5 8 1 6 49 62 4

-1 3 4 34 43 33 3 6 4 18 25 18 -1 2 5 102 99 2 14 4 5 49 45 5 9 1 6 184 189 2

0 3 4 0 2 1 4 6 4 0 2 1 0 2 5 112 107 2 15 4 5 0 24 1 10 1 6 71 73 3

1 3 4 111 54 14 5 6 4 0 25 1 1 2 5 35 31 5 16 4 5 18 0 18 11 1 6 93 99 2

2 3 4 0 12 1 -23 0 5 0 14 1 2 2 5 81 87 2 17 4 5 0 1 1 12 1 6 0 7 1

3 3 4 79 50 21 -21 0 5 0 20 1 3 2 5 21 18 20 -13 5 5 26 10 25 13 1 6 0 17 1

4 3 4 55 24 55 -19 0 5 0 5 1 4 2 5 167 157 2 -12 5 5 38 6 7 14 1 6 18 17 17

5 3 4 50 29 50 -17 0 5 34 15 6 5 2 5 0 11 1 -11 5 5 21 26 20 15 1 6 0 43 1

6 3 4 137 60 12 -15 0 5 59 64 4 6 2 5 52 53 3 -10 5 5 35 23 8 16 1 6 0 15 1

7 3 4 0 36 1 -13 0 5 88 94 2 7 2 5 23 40 22 -9 5 5 24 8 24 17 1 6 0 11 1

8 3 4 0 21 1 -11 0 5 32 25 5 8 2 5 94 93 2 -8 5 5 20 7 20 18 1 6 37 32 7

9 3 4 91 45 19 -9 0 5 54 52 3 9 2 5 0 0 1 -7 5 5 0 11 1 19 1 6 17 18 17

10 3 4 0 22 1 -7 0 5 0 24 1 10 2 5 91 95 3 -6 5 5 0 4 1 20 1 6 0 1 1

11 3 4 105 54 16 -5 0 5 147 156 2 11 2 5 69 66 3 -5 5 5 26 32 26 21 1 6 25 28 25

12 3 4 105 57 19 -3 0 5 101 94 2 12 2 5 103 108 3 -4 5 5 21 26 20 22 1 6 0 3 1

13 3 4 199 108 12 -1 0 5 84 85 2 13 2 5 0 13 1 -3 5 5 20 0 19 -21 2 6 0 3 1

14 3 4 0 10 1 1 0 5 92 91 2 14 2 5 87 82 3 -2 5 5 0 2 1 -20 2 6 18 6 18

15 3 4 81 29 24 3 0 5 144 145 2 15 2 5 22 22 22 -1 5 5 0 15 1 -19 2 6 31 12 30

16 3 4 0 17 1 5 0 5 28 21 7 16 2 5 21 2 17 0 5 5 0 11 1 -18 2 6 21 30 20

17 3 4 75 11 75 7 0 5 0 23 1 17 2 5 17 12 16 1 5 5 0 9 1 -17 2 6 0 31 1

18 3 4 83 18 22 9 0 5 0 11 1 18 2 5 32 26 32 2 5 5 16 2 16 -16 2 6 32 37 9

19 3 4 35 3 35 11 0 5 37 41 5 19 2 5 25 2 25 3 5 5 47 36 5 -15 2 6 46 36 5

-18 4 4 29 30 28 13 0 5 27 27 26 20 2 5 0 16 1 4 5 5 6 29 5 -14 2 6 0 40 1

-17 4 4 36 21 6 15 0 5 53 55 4 21 2 5 0 11 1 5 5 5 0 28 1 -13 2 6 39 42 5

-16 4 4 0 6 1 17 0 5 0 0 1 -20 3 5 79 3 21 6 5 5 12 11 12 -12 2 6 10 20 9

-15 4 4 24 20 24 19 0 5 0 14 1 -19 3 5 0 40 1 7 5 5 34 23 8 -11 2 6 0 32 1

-14 4 4 0 7 1 21 0 5 17 12 17 -18 3 5 41 56 40 8 5 5 18 16 18 -10 2 6 0 21 1

-13 4 4 23 8 23 -23 1 5 0 1 1 -17 3 5 0 21 1 9 5 5 29 14 9 -9 2 6 0 19 1

-12 4 4 16 24 16 -22 1 5 0 11 1 -16 3 5 61 41 61 10 5 5 0 26 1 -8 2 6 71 69 3

-11 4 4 37 21 6 -21 1 5 33 23 9 -15 3 5 62 5 24 11 5 5 0 14 1 -7 2 6 55 63 3

-10 4 4 0 7 1 -20 1 5 17 1 17 -14 3 5 0 33 1 12 5 5 11 9 10 -6 2 6 55 57 3

-9 4 4 23 13 15 -19 1 5 0 5 1 -13 3 5 0 9 1 13 5 5 29 6 29 -5 2 6 33 29 5

-8 4 4 15 25 15 -18 1 5 25 21 25 -12 3 5 79 19 15 -5 6 5 39 15 8 -4 2 6 22 26 11

-7 4 4 36 40 7 -17 1 5 18 29 18 -11 3 5 75 16 15 -4 6 5 0 17 1 -3 2 6 66 64 3

-6 4 4 21 33 20 -16 1 5 26 4 25 -10 3 5 0 8 1 -2 6 5 0 14 1 -2 2 6 104 88 2

-5 4 4 14 7 14 -15 1 5 25 3 24 -9 3 5 85 39 15 -1 6 5 0 24 1 -1 2 6 42 44 4

-4 4 4 20 4 20 -14 1 5 40 42 5 -8 3 5 67 35 66 0 6 5 24 19 23 0 2 6 55 42 3

-3 4 4 33 23 7 -13 1 5 42 47 5 -7 3 5 66 22 17 1 6 5 35 6 34 1 2 6 169 158 2

-2 4 4 22 30 22 -12 1 5 53 48 3 -6 3 5 163 81 7 2 6 5 0 26 1 2 2 6 32 38 6

-1 4 4 10 7 9 -11 1 5 65 65 3 -5 3 5 0 10 1 3 6 5 13 1 12 3 2 6 109 103 2

0 4 4 0 5 1 -10 1 5 24 28 9 -3 3 5 183 75 7 4 6 5 0 11 1 4 2 6 0 9 1

1 4 4 28 44 28 -9 1 5 49 48 4 -2 3 5 271 125 5 -22 0 6 0 24 1 5 2 6 58 50 3

2 4 4 54 59 4 -8 1 5 0 14 1 -1 3 5 0 1 1 -20 0 6 21 22 20 6 2 6 79 76 3

3 4 4 25 8 11 -7 1 5 0 16 1 0 3 5 0 12 1 -18 0 6 27 17 27 7 2 6 21 31 14

4 4 4 30 18 6 -6 1 5 80 80 2 1 3 5 50 3 50 -16 0 6 0 18 1 8 2 6 31 34 7

5 4 4 53 62 4 -5 1 5 21 25 10 2 3 5 193 81 7 -14 0 6 0 4 1 9 2 6 0 8 1

6 4 4 47 39 5 -4 1 5 122 134 2 3 3 5 0 2 1 -12 0 6 125 122 2 10 2 6 87 88 3

7 4 4 55 58 5 -3 1 5 270 265 3 4 3 5 56 20 55 -10 0 6 137 142 2 11 2 6 0 18 1

8 4 4 69 70 4 -2 1 5 140 147 2 5 3 5 0 2 1 -8 0 6 30 29 5 12 2 6 33 31 7

9 4 4 47 44 5 -1 1 5 163 163 2 6 3 5 58 47 57 -6 0 6 52 48 3 13 2 6 7 8 6

10 4 4 22 45 22 0 1 5 0 28 1 7 3 5 54 21 27 -4 0 6 146 141 2 14 2 6 146 152 3

11 4 4 16 28 16 1 1 5 51 52 3 8 3 5 0 7 1 -2 0 6 489 479 2 15 2 6 46 49 6

12 4 4 0 15 1 2 1 5 84 85 2 9 3 5 52 11 52 0 0 6 395 377 3 16 2 6 0 40 1

13 4 4 24 3 23 3 1 5 121 113 2 10 3 5 127 51 9 2 0 6 56 56 3 17 2 6 27 37 26

14 4 4 0 7 1 4 1 5 111 109 2 11 3 5 49 7 48 4 0 6 177 178 2 18 2 6 0 10 1

15 4 4 28 4 27 5 1 5 177 174 2 12 3 5 76 48 19 6 0 6 161 166 2 19 2 6 27 15 13

16 4 4 25 16 25 6 1 5 47 44 3 13 3 5 26 38 25 8 0 6 36 34 5 20 2 6 0 16 1

17 4 4 17 6 17 7 1 5 155 154 2 14 3 5 103 49 13 10 0 6 125 121 2 21 2 6 27 24 15

-14 5 4 0 5 1 8 1 5 61 61 3 15 3 5 0 1 1 12 0 6 41 37 4 -20 3 6 0 18 1

-13 5 4 13 3 12 9 1 5 110 117 2 16 3 5 0 15 1 14 0 6 67 72 3 -19 3 6 0 1 1

-12 5 4 30 3 9 10 1 5 0 17 1 17 3 5 29 8 28 16 0 6 54 51 5 -18 3 6 0 2 1

-11 5 4 43 32 6 11 1 5 50 56 4 18 3 5 42 10 41 18 0 6 61 62 4 -17 3 6 73 70 25

-10 5 4 0 11 1 12 1 5 54 54 4 19 3 5 61 7 25 20 0 6 0 10 1 -16 3 6 28 11 27

-9 5 4 0 25 1 13 1 5 94 101 3 -17 4 5 0 4 1 22 0 6 77 52 4 -15 3 6 27 6 26

-8 5 4 0 21 1 14 1 5 17 11 17 -16 4 5 0 23 1 -22 1 6 35 40 9 -14 3 6 0 10 1

-7 5 4 0 31 1 15 1 5 63 69 4 -15 4 5 0 17 1 -20 1 6 17 9 17 -13 3 6 44 1 44

-6 5 4 12 4 11 16 1 5 0 35 1 -14 4 5 21 15 20 -19 1 6 27 24 13 -12 3 6 0 5 1

-5 5 4 32 14 9 17 1 5 25 19 24 -13 4 5 20 9 20 -18 1 6 0 2 1 -11 3 6 0 21 1

-4 5 4 32 23 9 18 1 5 0 7 1 -12 4 5 28 18 28 -17 1 6 0 30 1 -10 3 6 33 47 33

-3 5 4 67 75 4 19 1 5 47 47 6 -11 4 5 0 3 1 -16 1 6 26 4 25 -9 3 6 91 32 12

-2 5 4 22 18 21 20 1 5 17 18 17 -10 4 5 0 5 1 -15 1 6 10 26 10 -8 3 6 39 8 39

-1 5 4 28 43 28 21 1 5 28 7 28 -9 4 5 0 9 1 -14 1 6 0 7 1 -7 3 6 91 44 13

0 5 4 35 37 9 22 1 5 0 8 1 -8 4 5 43 48 6 -13 1 6 0 20 1 -6 3 6 78 30 14

1 5 4 26 31 25 -22 2 5 21 13 21 -7 4 5 24 29 15 -12 1 6 95 91 2 -5 3 6 0 5 1

2 5 4 40 38 7 -21 2 5 6 15 6 -6 4 5 0 24 1 -11 1 6 0 22 1 -4 3 6 145 59 7

3 5 4 36 12 6 -20 2 5 31 15 31 -5 4 5 42 42 5 -10 1 6 19 9 13 -3 3 6 169 72 7

4 5 4 0 23 1 -19 2 5 0 27 1 -4 4 5 27 36 26 -9 1 6 29 32 6 -2 3 6 74 39 17

5 5 4 0 10 1 -18 2 5 12 11 12 -3 4 5 0 5 1 -8 1 6 0 28 1 -1 3 6 286 124 5

6 5 4 0 5 1 -17 2 5 48 48 7 -2 4 5 21 13 13 -7 1 6 0 37 1 0 3 6 144 51 8

7 5 4 17 1 16 -16 2 5 47 42 5 -1 4 5 52 64 5 -6 1 6 0 16 1 1 3 6 66 20 17

8 5 4 0 25 1 -15 2 5 0 12 1 0 4 5 68 67 3 -5 1 6 109 112 2 2 3 6 163 83 8

9 5 4 0 24 1 -14 2 5 0 4 1 1 4 5 0 21 1 -4 1 6 43 42 4 3 3 6 403 171 6

10 5 4 0 12 1 -13 2 5 20 1 20 2 4 5 0 18 1 -3 1 6 0 6 1 4 3 6 54 7 23

11 5 4 22 14 21 -12 2 5 0 22 1 3 4 5 0 2 1 -2 1 6 28 30 6 5 3 6 162 72 8

12 5 4 0 1 1 -11 2 5 25 5 9 4 4 5 57 56 3 -1 1 6 208 201 3 6 3 6 130 66 9

13 5 4 0 0 1 -10 2 5 16 14 16 5 4 5 0 7 1 0 1 6 71 65 2 7 3 6 0 17 1

-6 6 4 30 18 29 -9 2 5 73 66 3 6 4 5 28 14 27 1 1 6 0 7 1 8 3 6 0 6 1

Observed and calculated structure factors for cs2-13f1 Page 4

h k l 10Fo 10Fc 10s h k l 10Fo 10Fc 10s h k l 10Fo 10Fc 10s h k l 10Fo 10Fc 10s h k l 10Fo 10Fc 10s

9 3 6 0 4 1 9 0 7 41 42 4 -20 3 7 0 23 1 6 5 7 0 9 1 -6 2 8 0 22 1

10 3 6 0 12 1 11 0 7 37 41 5 -19 3 7 61 5 61 7 5 7 0 7 1 -5 2 8 22 29 22

11 3 6 140 59 10 13 0 7 22 5 11 -18 3 7 0 28 1 8 5 7 6 10 6 -4 2 8 12 3 12

12 3 6 157 78 9 15 0 7 15 12 14 -17 3 7 0 10 1 9 5 7 8 4 8 -3 2 8 21 67 21

13 3 6 261 151 8 17 0 7 23 24 13 -16 3 7 66 43 17 10 5 7 0 5 1 -2 2 8 85 81 3

14 3 6 85 58 18 19 0 7 0 8 1 -15 3 7 0 20 1 11 5 7 0 0 1 -1 2 8 12 12 12

15 3 6 27 0 27 21 0 7 13 13 12 -14 3 7 0 7 1 12 5 7 0 3 1 0 2 8 102 87 2

16 3 6 56 15 56 -22 1 7 0 6 1 -13 3 7 0 1 1 -3 6 7 36 15 10 1 2 8 0 5 1

17 3 6 146 94 11 -21 1 7 31 10 30 -12 3 7 30 18 29 -2 6 7 0 13 1 2 2 8 20 21 14

18 3 6 0 18 1 -20 1 7 0 17 1 -11 3 7 35 39 35 -1 6 7 32 18 32 3 2 8 43 34 5

19 3 6 34 3 33 -19 1 7 47 45 6 -10 3 7 103 61 8 0 6 7 0 8 1 4 2 8 118 108 2

-17 4 6 31 2 31 -18 1 7 20 18 19 -9 3 7 0 9 1 1 6 7 23 24 22 5 2 8 0 12 1

-16 4 6 0 19 1 -17 1 7 76 75 4 -8 3 7 135 75 6 2 6 7 26 2 26 6 2 8 73 67 3

-15 4 6 0 13 1 -16 1 7 11 25 10 -7 3 7 38 0 37 -22 0 8 18 7 18 7 2 8 57 59 4

-14 4 6 21 9 20 -15 1 7 59 63 4 -6 3 7 52 16 52 -20 0 8 0 19 1 8 2 8 64 74 4

-13 4 6 0 7 1 -14 1 7 25 29 10 -5 3 7 45 0 44 -18 0 8 0 23 1 9 2 8 0 6 1

-11 4 6 0 23 1 -13 1 7 38 35 5 -4 3 7 0 17 1 -16 0 8 0 3 1 10 2 8 45 47 5

-10 4 6 11 22 11 -12 1 7 21 27 20 -3 3 7 0 17 1 -14 0 8 24 26 24 11 2 8 0 0 1

-9 4 6 27 45 26 -11 1 7 0 8 1 -2 3 7 103 54 8 -12 0 8 0 13 1 12 2 8 25 15 11

-8 4 6 33 21 7 -10 1 7 0 8 1 -1 3 7 39 31 39 -10 0 8 21 21 11 13 2 8 76 70 4

-7 4 6 15 27 14 -9 1 7 27 38 8 0 3 7 89 54 9 -8 0 8 0 8 1 14 2 8 105 105 3

-6 4 6 0 9 1 -8 1 7 32 26 5 1 3 7 159 84 6 -6 0 8 42 45 4 15 2 8 58 61 5

-5 4 6 0 16 1 -7 1 7 72 72 3 2 3 7 130 74 6 -4 0 8 34 31 5 16 2 8 0 1 1

-4 4 6 0 14 1 -6 1 7 68 69 3 3 3 7 40 14 40 -2 0 8 176 167 2 17 2 8 22 16 21

-3 4 6 10 20 10 -5 1 7 71 62 2 4 3 7 124 55 7 0 0 8 107 105 2 18 2 8 27 34 13

-2 4 6 62 71 4 -4 1 7 0 10 1 5 3 7 45 36 45 2 0 8 76 75 2 19 2 8 27 8 26

-1 4 6 0 23 1 -3 1 7 129 120 2 6 3 7 50 21 49 4 0 8 151 148 2 20 2 8 0 3 1

0 4 6 74 81 3 -2 1 7 79 85 2 7 3 7 0 17 1 6 0 8 142 139 2 -19 3 8 0 9 1

1 4 6 18 37 17 -1 1 7 248 239 3 8 3 7 85 43 10 8 0 8 110 114 2 -18 3 8 17 8 16

2 4 6 27 30 27 0 1 7 162 169 2 9 3 7 0 6 1 10 0 8 8 15 8 -17 3 8 34 26 33

3 4 6 39 33 6 1 1 7 147 140 2 10 3 7 49 21 17 12 0 8 24 11 9 -16 3 8 66 40 16

4 4 6 18 28 17 2 1 7 55 55 3 11 3 7 0 24 1 14 0 8 0 16 1 -15 3 8 45 29 29

5 4 6 27 20 10 3 1 7 61 55 3 12 3 7 53 29 52 16 0 8 19 10 19 -14 3 8 0 1 1

6 4 6 0 25 1 4 1 7 16 13 15 13 3 7 0 8 1 18 0 8 0 7 1 -13 3 8 0 13 1

7 4 6 16 6 16 5 1 7 20 37 19 14 3 7 41 22 40 20 0 8 17 11 17 -12 3 8 0 7 1

8 4 6 30 32 9 6 1 7 52 47 3 15 3 7 0 26 1 -21 1 8 0 13 1 -11 3 8 56 6 17

9 4 6 36 30 7 7 1 7 65 62 3 16 3 7 0 8 1 -20 1 8 0 15 1 -10 3 8 20 22 20

10 4 6 0 1 1 8 1 7 61 65 3 17 3 7 34 13 34 -19 1 8 21 6 20 -9 3 8 0 8 1

11 4 6 0 18 1 9 1 7 87 87 2 18 3 7 34 14 33 -18 1 8 12 14 11 -8 3 8 39 9 38

12 4 6 16 8 16 10 1 7 94 91 2 19 3 7 0 16 1 -17 1 8 0 21 1 -7 3 8 123 70 7

13 4 6 40 33 7 11 1 7 18 13 18 -17 4 7 22 1 22 -16 1 8 0 13 1 -6 3 8 0 29 1

14 4 6 0 40 1 12 1 7 38 37 5 -16 4 7 18 22 17 -15 1 8 0 3 1 -5 3 8 101 54 8

15 4 6 33 41 33 13 1 7 10 22 10 -15 4 7 22 16 21 -14 1 8 32 35 7 -4 3 8 66 29 11

16 4 6 0 9 1 14 1 7 53 53 4 -14 4 7 12 7 12 -13 1 8 50 39 4 -3 3 8 51 16 51

-13 5 6 26 7 26 15 1 7 72 76 4 -13 4 7 26 30 12 -12 1 8 78 77 3 -2 3 8 18 17 18

-12 5 6 0 9 1 16 1 7 0 19 1 -12 4 7 50 54 5 -11 1 8 62 59 3 -1 3 8 106 68 8

-11 5 6 0 11 1 17 1 7 0 7 1 -11 4 7 0 3 1 -10 1 8 88 95 2 0 3 8 35 3 34

-10 5 6 0 2 1 18 1 7 0 6 1 -10 4 7 0 14 1 -9 1 8 23 19 9 1 3 8 75 50 11

-9 5 6 0 1 1 19 1 7 20 2 20 -9 4 7 22 6 22 -8 1 8 68 73 3 2 3 8 31 36 31

-8 5 6 0 8 1 20 1 7 28 16 27 -8 4 7 29 24 28 -7 1 8 0 19 1 3 3 8 97 42 9

-7 5 6 0 4 1 21 1 7 18 16 18 -7 4 7 0 21 1 -6 1 8 78 65 2 4 3 8 53 21 52

-6 5 6 0 17 1 -21 2 7 0 2 1 -6 4 7 53 53 4 -5 1 8 62 66 3 5 3 8 42 21 24

-5 5 6 0 19 1 -20 2 7 0 14 1 -5 4 7 0 30 1 -4 1 8 0 7 1 6 3 8 0 13 1

-4 5 6 36 34 7 -19 2 7 41 27 7 -4 4 7 40 47 5 -3 1 8 126 126 2 7 3 8 84 48 10

-3 5 6 0 6 1 -18 2 7 32 24 32 -3 4 7 0 16 1 -2 1 8 16 5 15 8 3 8 0 4 1

-2 5 6 18 15 18 -17 2 7 0 19 1 -2 4 7 31 52 31 -1 1 8 107 100 2 9 3 8 0 31 1

-1 5 6 61 60 5 -16 2 7 52 58 5 -1 4 7 0 30 1 0 1 8 0 57 1 10 3 8 29 17 29

0 5 6 0 18 1 -15 2 7 50 60 5 0 4 7 52 46 5 1 1 8 99 100 2 11 3 8 77 57 13

1 5 6 29 28 28 -14 2 7 0 19 1 1 4 7 10 15 10 2 1 8 58 59 3 12 3 8 71 39 15

2 5 6 23 33 23 -13 2 7 0 5 1 2 4 7 19 32 19 3 1 8 7 2 7 13 3 8 0 18 1

3 5 6 0 11 1 -12 2 7 56 54 4 3 4 7 0 0 1 4 1 8 113 104 2 14 3 8 0 11 1

4 5 6 0 3 1 -11 2 7 47 48 5 4 4 7 71 69 3 5 1 8 0 0 1 15 3 8 0 27 1

5 5 6 24 16 23 -10 2 7 40 34 5 5 4 7 30 34 30 6 1 8 31 35 6 16 3 8 68 20 67

6 5 6 0 15 1 -9 2 7 22 20 12 6 4 7 16 0 15 7 1 8 12 13 11 17 3 8 26 20 26

7 5 6 0 31 1 -8 2 7 44 43 4 7 4 7 0 0 1 8 1 8 72 83 3 18 3 8 0 25 1

9 5 6 49 39 5 -7 2 7 58 48 3 8 4 7 0 1 1 9 1 8 43 45 5 -17 4 8 0 11 1

10 5 6 0 5 1 -6 2 7 99 98 2 9 4 7 46 47 5 10 1 8 9 9 9 -16 4 8 46 37 7

11 5 6 0 5 1 -5 2 7 55 51 3 10 4 7 20 12 20 11 1 8 28 33 8 -15 4 8 43 29 6

12 5 6 32 25 11 -4 2 7 87 84 2 11 4 7 0 9 1 12 1 8 0 17 1 -14 4 8 0 7 1

-4 6 6 28 12 18 -3 2 7 8 8 8 12 4 7 0 16 1 13 1 8 35 24 6 -13 4 8 0 1 1

-3 6 6 13 2 12 -2 2 7 101 99 2 13 4 7 8 17 8 14 1 8 23 36 23 -12 4 8 26 2 26

-2 6 6 18 14 18 -1 2 7 66 73 3 14 4 7 42 44 8 15 1 8 49 41 5 -11 4 8 8 13 7

-1 6 6 24 20 24 0 2 7 62 58 3 15 4 7 60 50 5 16 1 8 0 16 1 -10 4 8 23 9 12

0 6 6 23 17 22 1 2 7 18 6 18 16 4 7 0 20 1 17 1 8 0 9 1 -9 4 8 0 21 1

1 6 6 0 0 1 2 2 7 137 130 2 -13 5 7 26 7 26 18 1 8 28 25 10 -8 4 8 0 6 1

2 6 6 13 10 13 3 2 7 57 44 3 -12 5 7 41 4 6 19 1 8 0 11 1 -7 4 8 35 31 7

3 6 6 0 7 1 4 2 7 134 126 2 -11 5 7 0 6 1 20 1 8 13 1 12 -6 4 8 19 6 19

-23 0 7 32 26 32 5 2 7 26 42 26 -10 5 7 0 12 1 21 1 8 26 2 25 -5 4 8 30 19 8

-21 0 7 52 52 6 6 2 7 0 9 1 -9 5 7 0 8 1 -21 2 8 0 4 1 -4 4 8 32 21 8

-19 0 7 93 77 3 7 2 7 9 3 9 -8 5 7 0 9 1 -20 2 8 19 3 18 -3 4 8 32 41 31

-17 0 7 0 16 1 8 2 7 75 82 3 -7 5 7 0 12 1 -19 2 8 0 1 1 -2 4 8 0 18 1

-15 0 7 71 65 3 9 2 7 26 27 9 -6 5 7 0 15 1 -18 2 8 25 34 25 -1 4 8 0 15 1

-13 0 7 40 38 5 10 2 7 54 54 4 -5 5 7 0 12 1 -17 2 8 25 21 24 0 4 8 11 19 10

-11 0 7 52 47 3 11 2 7 0 26 1 -4 5 7 0 10 1 -16 2 8 67 70 5 1 4 8 20 1 20

-9 0 7 144 137 2 12 2 7 0 19 1 -3 5 7 0 10 1 -15 2 8 0 0 1 2 4 8 0 17 1

-7 0 7 77 82 2 13 2 7 19 21 18 -2 5 7 0 21 1 -14 2 8 20 23 19 3 4 8 0 11 1

-5 0 7 14 5 14 14 2 7 126 125 3 -1 5 7 46 38 6 -13 2 8 0 17 1 4 4 8 19 5 18

-3 0 7 257 249 3 15 2 7 20 11 20 0 5 7 0 30 1 -12 2 8 0 4 1 5 4 8 0 13 1

-1 0 7 71 62 2 16 2 7 59 59 4 1 5 7 41 40 6 -11 2 8 0 10 1 6 4 8 11 12 10

1 0 7 194 189 2 17 2 7 0 7 1 2 5 7 0 12 1 -10 2 8 0 0 1 7 4 8 0 3 1

3 0 7 78 85 2 18 2 7 22 33 21 3 5 7 24 10 23 -9 2 8 42 37 5 8 4 8 11 0 11

5 0 7 55 58 3 19 2 7 0 7 1 4 5 7 13 28 12 -8 2 8 32 30 7 9 4 8 0 22 1

7 0 7 39 40 4 20 2 7 35 27 9 5 5 7 0 7 1 -7 2 8 42 43 5 10 4 8 20 49 20

Observed and calculated structure factors for cs2-13f1 Page 5

h k l 10Fo 10Fc 10s h k l 10Fo 10Fc 10s h k l 10Fo 10Fc 10s h k l 10Fo 10Fc 10s h k l 10Fo 10Fc 10s

11 4 8 0 7 1 19 1 9 17 7 16 -5 4 9 29 22 28 4 1 10 74 77 3 16 3 10 21 43 21

12 4 8 0 7 1 21 1 9 13 13 13 -4 4 9 22 28 21 5 1 10 8 19 8 17 3 10 39 36 27

13 4 8 21 25 20 -21 2 9 14 6 13 -3 4 9 0 31 1 6 1 10 38 25 5 -16 4 10 26 23 14

14 4 8 0 1 1 -20 2 9 0 14 1 -2 4 9 32 26 7 7 1 10 19 12 12 -15 4 10 28 35 15

15 4 8 18 16 18 -19 2 9 29 13 29 -1 4 9 0 29 1 8 1 10 32 32 6 -14 4 10 39 27 7

16 4 8 0 8 1 -18 2 9 15 6 15 0 4 9 20 25 20 9 1 10 64 64 3 -13 4 10 0 23 1

-12 5 8 18 20 18 -17 2 9 44 30 6 1 4 9 0 2 1 10 1 10 0 5 1 -12 4 10 8 16 8

-11 5 8 31 36 31 -16 2 9 0 29 1 2 4 9 24 3 24 11 1 10 24 15 24 -11 4 10 21 19 20

-10 5 8 23 0 17 -15 2 9 37 49 37 3 4 9 0 4 1 12 1 10 19 17 19 -10 4 10 29 42 28

-9 5 8 0 20 1 -14 2 9 25 23 25 4 4 9 45 32 5 13 1 10 26 9 25 -9 4 10 16 36 16

-8 5 8 0 8 1 -13 2 9 25 17 10 5 4 9 27 20 10 14 1 10 45 41 5 -8 4 10 0 26 1

-7 5 8 0 27 1 -12 2 9 13 19 13 6 4 9 25 11 24 15 1 10 16 7 15 -7 4 10 0 11 1

-6 5 8 0 9 1 -11 2 9 21 13 20 7 4 9 0 5 1 16 1 10 12 34 11 -6 4 10 21 18 20

-5 5 8 0 2 1 -10 2 9 0 12 1 8 4 9 0 26 1 17 1 10 17 11 16 -5 4 10 27 42 27

-4 5 8 0 32 1 -9 2 9 32 30 7 9 4 9 0 14 1 18 1 10 17 8 17 -4 4 10 0 21 1

-3 5 8 31 1 31 -8 2 9 0 18 1 10 4 9 0 2 1 19 1 10 0 9 1 -3 4 10 31 33 9

-2 5 8 22 13 17 -7 2 9 39 30 5 11 4 9 0 4 1 20 1 10 0 10 1 -2 4 10 40 32 6

-1 5 8 56 58 5 -6 2 9 48 50 4 12 4 9 17 34 17 -21 2 10 28 2 27 -1 4 10 24 29 24

0 5 8 34 39 33 -5 2 9 24 18 9 13 4 9 42 8 6 -20 2 10 23 8 23 0 4 10 49 53 6

1 5 8 29 29 11 -4 2 9 18 24 18 14 4 9 0 0 1 -19 2 10 26 26 18 1 4 10 0 4 1

2 5 8 0 23 1 -3 2 9 18 21 17 15 4 9 0 0 1 -18 2 10 13 19 12 2 4 10 0 17 1

3 5 8 0 1 1 -2 2 9 24 26 10 -12 5 9 24 20 18 -17 2 10 48 43 6 3 4 10 27 10 27

4 5 8 0 12 1 -1 2 9 26 18 9 -11 5 9 39 38 9 -16 2 10 35 28 7 4 4 10 42 33 6

5 5 8 12 23 12 0 2 9 32 22 7 -10 5 9 0 1 1 -15 2 10 35 19 7 5 4 10 0 11 1

6 5 8 0 3 1 1 2 9 0 11 1 -9 5 9 0 12 1 -14 2 10 30 10 9 6 4 10 0 35 1

7 5 8 21 9 21 2 2 9 26 21 8 -8 5 9 37 23 8 -13 2 10 0 20 1 7 4 10 42 53 6

8 5 8 0 4 1 3 2 9 115 110 2 -7 5 9 45 39 6 -12 2 10 0 32 1 8 4 10 33 18 7

9 5 8 28 33 28 4 2 9 29 27 7 -6 5 9 33 22 9 -11 2 10 0 1 1 9 4 10 0 10 1

10 5 8 0 35 1 5 2 9 50 42 4 -5 5 9 0 6 1 -10 2 10 0 17 1 10 4 10 26 28 12

11 5 8 13 12 13 6 2 9 39 24 5 -4 5 9 31 42 11 -9 2 10 62 59 3 11 4 10 21 15 21

-21 0 9 42 39 8 7 2 9 29 59 29 -3 5 9 0 21 1 -8 2 10 19 26 19 13 4 10 0 12 1

-19 0 9 58 49 4 8 2 9 44 37 5 -2 5 9 21 37 20 -7 2 10 0 15 1 14 4 10 45 19 5

-17 0 9 0 0 1 9 2 9 0 13 1 -1 5 9 0 13 1 -6 2 10 62 67 3 15 4 10 0 7 1

-15 0 9 34 27 6 10 2 9 47 48 5 0 5 9 0 1 1 -5 2 10 84 81 3 -11 5 10 0 10 1

-13 0 9 62 68 3 11 2 9 15 30 15 1 5 9 24 12 24 -4 2 10 0 11 1 -10 5 10 26 1 25

-11 0 9 64 60 3 12 2 9 25 17 25 2 5 9 0 8 1 -3 2 10 0 14 1 -9 5 10 0 5 1

-9 0 9 85 80 2 13 2 9 57 62 5 3 5 9 0 9 1 -2 2 10 73 68 3 -8 5 10 12 12 12

-7 0 9 77 72 2 14 2 9 45 39 6 4 5 9 24 11 24 -1 2 10 24 34 24 -7 5 10 30 25 11

-5 0 9 193 195 2 15 2 9 0 5 1 5 5 9 0 13 1 0 2 10 49 39 4 -6 5 10 46 50 6

-3 0 9 30 22 5 16 2 9 45 42 7 6 5 9 0 5 1 1 2 10 53 39 4 -5 5 10 0 12 1

-1 0 9 25 31 25 17 2 9 0 33 1 7 5 9 0 6 1 2 2 10 95 59 3 -4 5 10 21 21 21

1 0 9 0 16 1 18 2 9 0 13 1 8 5 9 25 20 25 3 2 10 25 26 24 -3 5 10 0 26 1

3 0 9 91 85 2 19 2 9 29 7 11 9 5 9 0 8 1 4 2 10 92 45 3 -2 5 10 40 41 7

5 0 9 39 45 4 20 2 9 20 3 19 10 5 9 18 8 18 5 2 10 39 28 5 -1 5 10 0 14 1

7 0 9 8 7 8 -19 3 9 47 6 18 11 5 9 0 4 1 6 2 10 45 40 5 0 5 10 0 2 1

9 0 9 53 54 3 -18 3 9 0 6 1 -22 0 10 0 11 1 7 2 10 106 100 2 1 5 10 0 15 1

11 0 9 16 33 16 -17 3 9 51 6 50 -20 0 10 0 6 1 8 2 10 10 30 10 2 5 10 0 12 1

13 0 9 0 19 1 -16 3 9 28 40 28 -18 0 10 0 17 1 9 2 10 19 6 18 3 5 10 13 18 13

15 0 9 0 8 1 -15 3 9 0 11 1 -16 0 10 0 1 1 10 2 10 0 19 1 4 5 10 0 22 1

17 0 9 0 24 1 -14 3 9 0 41 1 -14 0 10 0 9 1 11 2 10 25 13 24 5 5 10 22 5 21

19 0 9 30 18 29 -13 3 9 19 18 18 -12 0 10 51 50 4 12 2 10 0 2 1 6 5 10 0 2 1

21 0 9 0 10 1 -12 3 9 55 27 55 -10 0 10 0 0 1 13 2 10 23 7 23 7 5 10 0 8 1

-22 1 9 18 20 18 -11 3 9 29 2 28 -8 0 10 23 16 9 14 2 10 71 70 4 8 5 10 0 9 1

-21 1 9 0 13 1 -10 3 9 104 65 7 -6 0 10 97 95 2 15 2 10 0 16 1 9 5 10 26 11 25

-20 1 9 33 37 8 -9 3 9 43 30 17 -4 0 10 123 123 2 16 2 10 0 9 1 10 5 10 26 22 17

-19 1 9 12 13 11 -8 3 9 26 22 25 -2 0 10 53 54 3 17 2 10 33 29 9 -21 0 11 54 44 5

-18 1 9 11 16 11 -7 3 9 37 18 37 0 0 10 38 38 4 18 2 10 0 3 1 -19 0 11 0 53 1

-17 1 9 0 8 1 -6 3 9 108 64 6 2 0 10 53 52 3 19 2 10 31 28 30 -17 0 11 101 89 3

-16 1 9 22 15 15 -5 3 9 28 11 27 4 0 10 91 94 2 -19 3 10 0 0 1 -15 0 11 115 127 3

-15 1 9 28 35 27 -4 3 9 39 20 17 6 0 10 115 116 2 -18 3 10 0 13 1 -13 0 11 28 45 28

-14 1 9 38 37 6 -3 3 9 0 11 1 8 0 10 93 94 2 -17 3 10 29 3 29 -11 0 11 38 34 5

-13 1 9 0 8 1 -2 3 9 32 3 31 10 0 10 66 70 3 -16 3 10 41 30 24 -9 0 11 74 79 3

-12 1 9 42 46 4 -1 3 9 0 17 1 12 0 10 46 37 4 -15 3 10 56 30 12 -7 0 11 137 139 2

-11 1 9 39 44 5 0 3 9 97 49 8 14 0 10 18 6 18 -14 3 10 26 35 26 -5 0 11 153 166 2

-10 1 9 65 75 3 1 3 9 46 37 45 16 0 10 0 1 1 -13 3 10 0 15 1 -3 0 11 229 246 3

-9 1 9 26 20 7 2 3 9 32 34 32 18 0 10 0 3 1 -12 3 10 18 8 18 -1 0 11 71 68 2

-8 1 9 24 2 8 3 3 9 0 0 1 20 0 10 0 4 1 -11 3 10 0 18 1 1 0 11 31 33 5

-7 1 9 14 29 14 4 3 9 0 38 1 -22 1 10 0 36 1 -10 3 10 64 29 9 3 0 11 55 58 3

-6 1 9 20 12 10 5 3 9 25 23 25 -21 1 10 30 17 9 -9 3 10 0 22 1 5 0 11 65 61 3

-5 1 9 0 2 1 6 3 9 52 22 51 -20 1 10 38 42 9 -8 3 10 0 31 1 7 0 11 0 6 1

-4 1 9 23 38 22 7 3 9 0 24 1 -19 1 10 0 5 1 -7 3 10 73 29 8 9 0 11 93 110 2

-3 1 9 21 13 21 8 3 9 105 45 8 -18 1 10 59 58 4 -6 3 10 37 23 37 11 0 11 0 8 1

-2 1 9 86 93 2 9 3 9 29 0 29 -17 1 10 20 7 19 -5 3 10 0 9 1 13 0 11 59 76 4

-1 1 9 21 15 12 10 3 9 90 49 11 -16 1 10 22 32 22 -4 3 10 65 38 9 15 0 11 30 52 29

0 1 9 0 13 1 11 3 9 73 34 13 -15 1 10 58 47 4 -3 3 10 40 19 39 17 0 11 12 12 12

1 1 9 59 49 3 12 3 9 0 23 1 -14 1 10 15 48 14 -2 3 10 67 47 9 19 0 11 18 12 17

2 1 9 63 61 3 13 3 9 0 17 1 -13 1 10 29 24 7 -1 3 10 46 23 45 -21 1 11 31 16 11

3 1 9 20 29 20 14 3 9 30 41 29 -12 1 10 44 45 5 0 3 10 44 28 13 -20 1 11 31 0 30

4 1 9 69 66 3 15 3 9 0 1 1 -11 1 10 0 13 1 1 3 10 40 4 39 -19 1 11 21 22 21

5 1 9 126 134 2 16 3 9 0 19 1 -10 1 10 48 45 4 2 3 10 28 13 28 -18 1 11 20 21 20

6 1 9 22 8 21 17 3 9 25 14 24 -9 1 10 0 1 1 3 3 10 86 51 7 -17 1 11 11 18 11

7 1 9 23 4 22 18 3 9 44 13 44 -8 1 10 74 85 3 4 3 10 0 17 1 -16 1 11 74 75 4

8 1 9 0 11 1 -16 4 9 0 0 1 -7 1 10 15 24 14 5 3 10 23 20 23 -15 1 11 0 20 1

9 1 9 46 49 4 -15 4 9 58 54 5 -6 1 10 82 72 2 6 3 10 59 42 10 -14 1 11 67 69 4

10 1 9 0 19 1 -14 4 9 25 15 24 -5 1 10 90 92 2 7 3 10 17 13 17 -13 1 11 39 37 6

11 1 9 40 45 5 -13 4 9 0 16 1 -4 1 10 38 33 4 8 3 10 40 10 39 -12 1 11 17 20 17

12 1 9 56 46 3 -12 4 9 17 10 16 -3 1 10 72 79 2 9 3 10 51 34 50 -11 1 11 0 21 1

13 1 9 0 8 1 -11 4 9 31 26 31 -2 1 10 69 69 3 10 3 10 0 43 1 -10 1 11 44 40 4

14 1 9 0 6 1 -10 4 9 16 29 16 -1 1 10 24 26 8 11 3 10 107 60 7 -9 1 11 57 60 3

15 1 9 0 21 1 -9 4 9 27 14 9 0 1 10 130 124 2 12 3 10 47 10 47 -8 1 11 64 70 3

16 1 9 11 18 11 -8 4 9 0 0 1 1 1 10 63 67 3 13 3 10 39 37 39 -7 1 11 73 74 3

17 1 9 0 38 1 -7 4 9 29 9 29 2 1 10 63 58 3 14 3 10 0 10 1 -6 1 11 73 76 3

18 1 9 38 27 6 -6 4 9 0 0 1 3 1 10 56 67 3 15 3 10 73 41 10 -5 1 11 42 48 4

Observed and calculated structure factors for cs2-13f1 Page 6

h k l 10Fo 10Fc 10s h k l 10Fo 10Fc 10s h k l 10Fo 10Fc 10s h k l 10Fo 10Fc 10s h k l 10Fo 10Fc 10s

-4 1 11 75 87 3 10 3 11 42 22 41 -8 1 12 13 12 13 8 3 12 42 12 10 -4 1 13 83 82 3

-3 1 11 53 65 4 11 3 11 0 13 1 -7 1 12 27 20 27 9 3 12 0 16 1 -3 1 13 108 106 2

-2 1 11 30 27 6 12 3 11 0 17 1 -6 1 12 104 100 2 10 3 12 38 23 18 -2 1 13 96 108 2

-1 1 11 28 19 7 13 3 11 42 14 21 -5 1 12 23 5 8 11 3 12 17 5 16 -1 1 13 104 97 2

0 1 11 0 19 1 14 3 11 29 26 28 -4 1 12 115 112 2 12 3 12 37 4 16 0 1 13 51 57 4

1 1 11 68 71 3 15 3 11 0 19 1 -3 1 12 21 26 20 13 3 12 50 28 11 1 1 13 63 57 3

2 1 11 0 6 1 16 3 11 33 14 32 -2 1 12 142 136 2 14 3 12 0 8 1 2 1 13 0 15 1

3 1 11 85 88 2 17 3 11 22 25 21 -1 1 12 27 21 26 15 3 12 0 31 1 3 1 13 30 27 6

4 1 11 27 26 7 -16 4 11 0 3 1 0 1 12 0 8 1 16 3 12 37 17 37 4 1 13 63 62 3

5 1 11 0 4 1 -15 4 11 36 25 8 1 1 12 113 113 2 -15 4 12 26 18 26 5 1 13 41 24 4

6 1 11 32 24 5 -14 4 11 31 35 31 2 1 12 20 30 13 -14 4 12 0 21 1 6 1 13 35 33 5

7 1 11 16 37 15 -13 4 11 25 34 25 3 1 12 96 99 2 -13 4 12 12 20 12 7 1 13 27 15 27

8 1 11 19 24 18 -12 4 11 32 28 10 4 1 12 46 47 4 -12 4 12 13 7 13 8 1 13 0 26 1

9 1 11 60 64 4 -11 4 11 37 34 7 5 1 12 29 37 28 -11 4 12 0 33 1 9 1 13 0 9 1

10 1 11 22 30 22 -10 4 11 0 45 1 6 1 12 30 34 6 -10 4 12 21 37 20 10 1 13 31 49 31

11 1 11 26 24 9 -9 4 11 57 55 5 7 1 12 49 51 4 -9 4 12 0 13 1 11 1 13 72 78 4

12 1 11 47 47 5 -8 4 11 0 12 1 8 1 12 24 18 23 -8 4 12 29 12 28 12 1 13 34 33 8

13 1 11 63 71 4 -7 4 11 0 11 1 9 1 12 14 6 14 -7 4 12 30 26 10 13 1 13 87 93 3

14 1 11 0 29 1 -6 4 11 8 4 7 10 1 12 36 36 6 -6 4 12 0 7 1 14 1 13 16 21 16

15 1 11 0 8 1 -5 4 11 0 13 1 11 1 12 61 67 4 -5 4 12 0 3 1 15 1 13 0 27 1

16 1 11 12 22 11 -4 4 11 42 43 7 12 1 12 75 71 4 -4 4 12 0 19 1 16 1 13 0 9 1

17 1 11 37 25 7 -3 4 11 27 4 27 13 1 12 25 30 24 -3 4 12 0 34 1 17 1 13 42 37 6

18 1 11 35 1 7 -2 4 11 62 69 5 14 1 12 64 60 4 -2 4 12 61 55 5 18 1 13 0 7 1

19 1 11 36 27 7 -1 4 11 74 77 4 15 1 12 0 12 1 -1 4 12 0 10 1 19 1 13 32 6 11

20 1 11 0 8 1 0 4 11 0 4 1 16 1 12 0 15 1 0 4 12 0 10 1 -19 2 13 0 1 1

-20 2 11 44 16 7 1 4 11 0 26 1 17 1 12 0 20 1 1 4 12 0 27 1 -18 2 13 14 10 14

-19 2 11 27 8 27 2 4 11 0 2 1 18 1 12 34 15 7 2 4 12 0 14 1 -17 2 13 17 2 17

-18 2 11 37 23 7 3 4 11 0 15 1 19 1 12 26 21 26 3 4 12 23 2 22 -16 2 13 32 20 9

-17 2 11 52 53 6 4 4 11 25 6 25 -20 2 12 0 10 1 4 4 12 0 7 1 -15 2 13 13 26 12

-16 2 11 0 1 1 5 4 11 16 7 16 -19 2 12 0 18 1 5 4 12 49 56 5 -14 2 13 12 27 12

-15 2 11 41 38 7 6 4 11 48 43 5 -18 2 12 0 15 1 6 4 12 18 14 17 -13 2 13 34 40 10

-14 2 11 26 6 13 7 4 11 0 20 1 -17 2 12 0 9 1 7 4 12 21 6 20 -12 2 13 17 9 16

-13 2 11 31 39 11 8 4 11 0 18 1 -16 2 12 0 5 1 8 4 12 0 19 1 -11 2 13 55 65 6

-12 2 11 27 26 13 9 4 11 30 39 29 -15 2 12 35 29 9 9 4 12 21 17 21 -10 2 13 0 1 1

-11 2 11 19 37 19 10 4 11 0 28 1 -14 2 12 17 23 17 10 4 12 0 10 1 -9 2 13 32 36 8

-10 2 11 0 13 1 11 4 11 0 34 1 -13 2 12 49 38 7 11 4 12 0 7 1 -8 2 13 19 30 19

-9 2 11 17 26 17 12 4 11 13 28 12 -12 2 12 20 48 20 12 4 12 0 13 1 -7 2 13 73 67 4

-8 2 11 20 21 20 13 4 11 0 19 1 -11 2 12 16 13 16 13 4 12 19 12 18 -6 2 13 23 18 13

-7 2 11 69 72 3 14 4 11 0 24 1 -10 2 12 19 25 19 -10 5 12 22 7 22 -5 2 13 30 27 29

-6 2 11 15 17 15 -11 5 11 0 6 1 -9 2 12 60 50 4 -9 5 12 29 8 12 -4 2 13 23 10 23

-5 2 11 19 33 19 -9 5 11 0 3 1 -8 2 12 52 51 4 -8 5 12 0 3 1 -3 2 13 25 1 25

-4 2 11 75 69 3 -8 5 11 15 8 14 -7 2 12 0 22 1 -7 5 12 6 1 6 -2 2 13 48 53 6

-3 2 11 0 5 1 -7 5 11 43 31 6 -6 2 12 15 6 14 -6 5 12 31 13 30 -1 2 13 10 18 10

-2 2 11 47 42 4 -6 5 11 0 19 1 -5 2 12 10 21 10 -5 5 12 22 17 21 0 2 13 84 81 3

-1 2 11 0 6 1 -5 5 11 35 26 8 -4 2 12 76 77 3 -4 5 12 25 28 24 1 2 13 53 44 4

0 2 11 13 6 13 -4 5 11 0 13 1 -3 2 12 26 1 9 -3 5 12 22 41 21 2 2 13 72 70 3

1 2 11 10 36 9 -3 5 11 26 3 12 -2 2 12 112 96 2 -2 5 12 17 6 16 3 2 13 37 21 6

2 2 11 29 21 8 -2 5 11 0 13 1 -1 2 12 17 28 17 -1 5 12 0 1 1 4 2 13 52 55 5

3 2 11 17 31 16 -1 5 11 0 7 1 0 2 12 34 41 7 0 5 12 29 4 10 5 2 13 33 26 7

4 2 11 31 31 7 0 5 11 37 30 8 1 2 12 0 3 1 1 5 12 0 14 1 6 2 13 29 29 29

5 2 11 36 27 5 1 5 11 17 15 17 2 2 12 0 4 1 3 5 12 0 22 1 7 2 13 36 20 6

6 2 11 19 20 18 2 5 11 0 5 1 3 2 12 67 58 4 4 5 12 30 26 9 8 2 13 73 66 4

7 2 11 23 39 23 3 5 11 28 11 27 4 2 12 0 8 1 5 5 12 21 8 21 9 2 13 19 32 19

8 2 11 68 64 3 4 5 11 0 10 1 5 2 12 92 83 3 6 5 12 26 7 25 10 2 13 37 28 8

9 2 11 15 17 15 5 5 11 0 0 1 6 2 12 18 8 18 7 5 12 0 12 1 11 2 13 43 32 7

10 2 11 0 9 1 6 5 11 0 11 1 7 2 12 36 28 6 8 5 12 0 9 1 12 2 13 0 39 1

11 2 11 0 21 1 7 5 11 0 7 1 8 2 12 19 5 19 -21 0 13 0 2 1 13 2 13 0 5 1

12 2 11 32 31 10 8 5 11 29 13 28 9 2 12 28 8 27 -19 0 13 0 17 1 14 2 13 52 46 6

13 2 11 0 7 1 9 5 11 33 30 11 10 2 12 26 0 12 -17 0 13 23 18 23 15 2 13 0 17 1

14 2 11 29 27 11 -20 0 12 0 34 1 11 2 12 24 5 23 -15 0 13 64 69 4 16 2 13 0 21 1

15 2 11 0 27 1 -18 0 12 17 17 16 12 2 12 56 49 5 -13 0 13 0 5 1 17 2 13 0 5 1

16 2 11 0 12 1 -16 0 12 22 15 16 13 2 12 28 5 27 -11 0 13 35 33 6 18 2 13 0 3 1

17 2 11 18 0 18 -14 0 12 10 7 10 14 2 12 0 8 1 -9 0 13 27 19 26 -17 3 13 0 11 1

18 2 11 50 44 6 -12 0 12 41 35 5 15 2 12 0 22 1 -7 0 13 94 99 2 -16 3 13 34 25 33

19 2 11 0 26 1 -10 0 12 25 7 25 16 2 12 0 12 1 -5 0 13 68 66 3 -15 3 13 0 33 1

-18 3 11 0 34 1 -8 0 12 22 5 10 17 2 12 20 19 19 -3 0 13 52 59 3 -14 3 13 0 36 1

-17 3 11 49 4 16 -6 0 12 0 19 1 18 2 12 0 14 1 -1 0 13 65 66 3 -13 3 13 29 18 29

-16 3 11 0 13 1 -4 0 12 0 0 1 -18 3 12 0 12 1 1 0 13 100 101 2 -12 3 13 17 28 16

-15 3 11 21 9 21 -2 0 12 12 11 11 -17 3 12 0 2 1 3 0 13 89 90 2 -11 3 13 0 28 1

-14 3 11 0 1 1 0 0 12 48 47 4 -16 3 12 0 1 1 5 0 13 0 4 1 -10 3 13 31 8 23

-13 3 11 43 17 42 2 0 12 29 29 6 -15 3 12 45 4 45 7 0 13 19 29 18 -9 3 13 0 20 1

-12 3 11 37 26 37 4 0 12 49 55 4 -14 3 12 55 20 12 9 0 13 28 33 9 -8 3 13 0 29 1

-11 3 11 49 24 48 6 0 12 31 32 6 -13 3 12 39 30 38 11 0 13 0 1 1 -7 3 13 0 31 1

-10 3 11 44 0 44 8 0 12 0 26 1 -12 3 12 19 28 19 13 0 13 27 4 26 -6 3 13 0 2 1

-9 3 11 0 24 1 10 0 12 0 32 1 -11 3 12 19 14 18 15 0 13 38 46 8 -5 3 13 15 5 15

-8 3 11 75 50 9 12 0 12 23 28 23 -10 3 12 32 25 31 17 0 13 46 45 6 -4 3 13 30 13 29

-7 3 11 33 7 32 14 0 12 80 75 3 -9 3 12 0 20 1 19 0 13 29 21 29 -3 3 13 28 23 28

-6 3 11 17 13 17 16 0 12 38 36 6 -8 3 12 51 48 50 -20 1 13 42 35 7 -2 3 13 60 43 7

-5 3 11 0 12 1 18 0 12 0 5 1 -7 3 12 25 23 24 -19 1 13 28 12 27 -1 3 13 33 39 33

-4 3 11 0 22 1 20 0 12 19 30 18 -6 3 12 39 28 39 -18 1 13 0 28 1 0 3 13 99 88 5

-3 3 11 50 47 49 -21 1 12 0 8 1 -5 3 12 15 2 14 -17 1 13 45 37 6 1 3 13 26 13 25

-2 3 11 0 1 1 -20 1 12 40 28 7 -4 3 12 39 20 38 -16 1 13 0 14 1 2 3 13 0 3 1

-1 3 11 33 20 33 -19 1 12 25 17 24 -3 3 12 39 16 38 -15 1 13 22 11 22 3 3 13 47 15 9

0 3 11 47 20 12 -18 1 12 0 3 1 -2 3 12 36 6 12 -14 1 13 27 23 10 4 3 13 92 56 6

1 3 11 17 6 16 -17 1 12 44 26 6 -1 3 12 29 1 29 -13 1 13 0 11 1 5 3 13 38 7 37

2 3 11 0 8 1 -16 1 12 32 32 32 0 3 12 0 0 1 -12 1 13 28 28 9 6 3 13 48 28 10

3 3 11 0 14 1 -15 1 12 31 15 9 1 3 12 47 25 8 -11 1 13 28 26 7 7 3 13 22 6 22

4 3 11 17 27 17 -14 1 12 87 89 3 2 3 12 54 29 8 -10 1 13 42 52 5 8 3 13 42 16 11

5 3 11 46 8 12 -13 1 12 21 10 20 3 3 12 49 30 9 -9 1 13 0 19 1 9 3 13 16 10 16

6 3 11 100 53 6 -12 1 12 76 74 3 4 3 12 0 3 1 -8 1 13 71 80 3 10 3 13 41 31 40

7 3 11 63 41 11 -11 1 12 0 2 1 5 3 12 43 32 10 -7 1 13 53 43 4 11 3 13 0 25 1

8 3 11 26 16 25 -10 1 12 10 11 9 6 3 12 31 28 30 -6 1 13 16 1 16 12 3 13 0 2 1

9 3 11 43 17 19 -9 1 12 22 27 11 7 3 12 0 46 1 -5 1 13 112 110 2 13 3 13 47 24 11

Observed and calculated structure factors for cs2-13f1 Page 7

h k l 10Fo 10Fc 10s h k l 10Fo 10Fc 10s h k l 10Fo 10Fc 10s h k l 10Fo 10Fc 10s h k l 10Fo 10Fc 10s

14 3 13 0 7 1 6 1 14 35 30 6 -2 4 14 16 37 16 -7 2 15 12 15 11 -8 0 16 20 21 20

15 3 13 26 1 26 7 1 14 0 8 1 -1 4 14 28 64 28 -6 2 15 9 2 9 -6 0 16 0 12 1

16 3 13 42 3 42 8 1 14 61 61 4 0 4 14 0 20 1 -5 2 15 60 56 5 -4 0 16 26 5 7

-14 4 13 34 40 12 9 1 14 0 2 1 1 4 14 0 26 1 -4 2 15 49 57 6 -2 0 16 10 43 9

-13 4 13 0 4 1 10 1 14 21 5 21 3 4 14 29 20 28 -3 2 15 23 7 22 0 0 16 71 68 3

-12 4 13 0 4 1 11 1 14 0 2 1 4 4 14 0 28 1 -2 2 15 23 23 22 2 0 16 24 14 23

-11 4 13 20 10 20 12 1 14 0 15 1 5 4 14 12 6 12 -1 2 15 33 34 8 4 0 16 22 3 22

-10 4 13 27 13 26 13 1 14 16 19 16 6 4 14 0 30 1 0 2 15 0 17 1 6 0 16 29 28 8

-9 4 13 0 3 1 14 1 14 19 0 19 7 4 14 0 8 1 1 2 15 25 31 13 8 0 16 0 16 1

-8 4 13 16 0 15 15 1 14 0 1 1 8 4 14 39 41 7 2 2 15 23 5 23 10 0 16 11 15 11

-7 4 13 0 20 1 16 1 14 36 16 6 9 4 14 28 8 27 3 2 15 59 36 4 12 0 16 16 14 16

-6 4 13 26 29 26 17 1 14 0 30 1 10 4 14 25 6 25 4 2 15 28 7 11 14 0 16 0 21 1

-5 4 13 23 17 23 18 1 14 26 11 15 11 4 14 0 11 1 5 2 15 23 6 17 16 0 16 18 6 17

-4 4 13 28 6 28 -19 2 14 36 1 36 12 4 14 25 0 17 6 2 15 0 12 1 -19 1 16 0 2 1

-3 4 13 0 27 1 -18 2 14 15 5 14 -7 5 14 0 12 1 7 2 15 0 11 1 -18 1 16 13 7 12

-2 4 13 39 34 7 -17 2 14 35 5 34 -6 5 14 0 20 1 8 2 15 25 24 24 -17 1 16 21 29 21

-1 4 13 0 6 1 -16 2 14 34 5 33 -5 5 14 20 9 20 9 2 15 13 20 12 -16 1 16 38 28 6

0 4 13 55 56 5 -15 2 14 54 54 6 -4 5 14 35 12 8 10 2 15 0 18 1 -15 1 16 17 5 16

1 4 13 0 8 1 -14 2 14 0 2 1 -3 5 14 0 3 1 12 2 15 0 5 1 -14 1 16 25 31 13

2 4 13 0 30 1 -13 2 14 61 60 5 -2 5 14 26 23 25 13 2 15 35 33 10 -13 1 16 23 25 17

3 4 13 12 17 11 -12 2 14 31 22 31 -1 5 14 0 31 1 14 2 15 0 10 1 -12 1 16 11 19 11

4 4 13 25 23 12 -11 2 14 72 86 5 0 5 14 11 17 10 15 2 15 22 6 21 -11 1 16 19 5 18

5 4 13 12 1 11 -10 2 14 0 9 1 1 5 14 0 9 1 16 2 15 34 15 11 -10 1 16 53 51 4

6 4 13 0 2 1 -9 2 14 0 9 1 2 5 14 0 13 1 -16 3 15 17 18 17 -9 1 16 29 16 29

7 4 13 0 5 1 -8 2 14 0 18 1 3 5 14 0 2 1 -15 3 15 0 2 1 -8 1 16 21 38 12

8 4 13 17 31 17 -7 2 14 0 7 1 4 5 14 0 7 1 -14 3 15 0 6 1 -7 1 16 20 7 20

9 4 13 30 0 8 -6 2 14 13 20 12 5 5 14 29 7 10 -13 3 15 28 3 28 -6 1 16 25 29 10

10 4 13 18 28 17 -5 2 14 5 21 5 -19 0 15 0 5 1 -12 3 15 47 36 10 -5 1 16 0 22 1

11 4 13 0 12 1 -4 2 14 19 7 19 -17 0 15 0 2 1 -11 3 15 36 16 35 -4 1 16 26 36 25

12 4 13 0 7 1 -3 2 14 44 47 7 -15 0 15 32 26 32 -10 3 15 91 74 6 -3 1 16 0 36 1

-9 5 13 0 4 1 -2 2 14 0 3 1 -13 0 15 0 0 1 -9 3 15 74 81 6 -2 1 16 48 46 4

-8 5 13 23 20 23 -1 2 14 142 135 3 -11 0 15 39 23 5 -8 3 15 124 100 4 -1 1 16 0 16 1

-7 5 13 22 14 22 0 2 14 36 43 9 -9 0 15 36 33 5 -7 3 15 0 35 1 0 1 16 0 17 1

-6 5 13 0 5 1 1 2 14 71 57 4 -7 0 15 77 81 3 -6 3 15 112 84 5 1 1 16 46 48 4

-5 5 13 0 1 1 2 2 14 35 32 7 -5 0 15 0 15 1 -5 3 15 71 39 6 2 1 16 121 125 2

-4 5 13 28 31 28 3 2 14 28 20 11 -3 0 15 88 91 2 -4 3 15 33 38 32 3 1 16 0 11 1

-3 5 13 0 38 1 4 2 14 62 55 5 -1 0 15 99 119 2 -3 3 15 29 22 29 4 1 16 0 6 1

-2 5 13 31 23 30 5 2 14 12 5 11 1 0 15 14 10 14 -2 3 15 72 59 7 5 1 16 13 7 13

-1 5 13 6 7 6 6 2 14 50 46 6 3 0 15 19 27 19 -1 3 15 29 1 29 6 1 16 20 23 20

0 5 13 25 9 25 7 2 14 32 20 31 5 0 15 0 15 1 0 3 15 0 6 1 7 1 16 0 3 1

1 5 13 0 12 1 8 2 14 17 23 17 7 0 15 0 17 1 1 3 15 0 20 1 8 1 16 21 24 21

2 5 13 0 3 1 9 2 14 28 22 12 9 0 15 50 52 4 2 3 15 0 18 1 9 1 16 22 26 21

3 5 13 0 4 1 10 2 14 0 4 1 11 0 15 67 64 4 3 3 15 37 14 14 10 1 16 0 3 1

4 5 13 0 2 1 11 2 14 44 40 7 13 0 15 0 0 1 4 3 15 64 41 8 11 1 16 0 4 1

5 5 13 0 13 1 13 2 14 0 7 1 15 0 15 0 0 1 5 3 15 0 18 1 12 1 16 43 40 6

6 5 13 0 2 1 14 2 14 41 31 9 17 0 15 0 12 1 6 3 15 0 16 1 13 1 16 20 7 20

7 5 13 0 13 1 15 2 14 32 3 31 -19 1 15 29 22 11 7 3 15 0 3 1 14 1 16 24 1 24

-20 0 14 31 32 31 16 2 14 0 12 1 -18 1 15 0 17 1 8 3 15 55 37 10 15 1 16 25 1 24

-18 0 14 51 46 5 17 2 14 33 13 33 -17 1 15 21 14 20 9 3 15 0 16 1 16 1 16 25 14 25

-16 0 14 57 51 4 -17 3 14 46 9 12 -16 1 15 0 2 1 10 3 15 0 6 1 17 1 16 32 7 31

-14 0 14 22 20 21 -16 3 14 0 16 1 -15 1 15 0 25 1 11 3 15 0 11 1 -18 2 16 0 11 1

-12 0 14 15 3 14 -15 3 14 31 2 31 -14 1 15 46 52 5 12 3 15 31 17 31 -17 2 16 0 2 1

-10 0 14 46 39 4 -14 3 14 0 11 1 -13 1 15 0 10 1 13 3 15 0 13 1 -16 2 16 33 31 10

-8 0 14 48 45 4 -13 3 14 62 45 8 -12 1 15 67 73 4 14 3 15 42 17 41 -15 2 16 24 23 24

-6 0 14 13 8 13 -12 3 14 0 12 1 -11 1 15 10 24 10 -13 4 15 18 0 18 -14 2 16 27 16 27

-4 0 14 20 25 20 -11 3 14 0 10 1 -10 1 15 26 21 9 -12 4 15 0 3 1 -13 2 16 0 15 1

-2 0 14 0 7 1 -10 3 14 0 5 1 -9 1 15 0 10 1 -11 4 15 0 10 1 -12 2 16 13 42 13

0 0 14 67 63 3 -9 3 14 47 37 13 -8 1 15 24 37 24 -10 4 15 0 31 1 -11 2 16 18 27 18

2 0 14 81 81 3 -8 3 14 39 4 39 -7 1 15 24 3 23 -9 4 15 0 11 1 -10 2 16 18 16 18

4 0 14 16 25 16 -7 3 14 43 25 13 -6 1 15 26 23 8 -8 4 15 40 38 7 -9 2 16 85 102 4

6 0 14 25 24 9 -6 3 14 13 18 13 -5 1 15 16 4 16 -7 4 15 27 10 26 -8 2 16 26 21 15

8 0 14 22 1 22 -5 3 14 70 51 7 -4 1 15 0 15 1 -6 4 15 8 19 7 -7 2 16 65 67 5

10 0 14 34 29 6 -4 3 14 41 24 40 -3 1 15 0 16 1 -5 4 15 31 12 31 -6 2 16 56 57 5

12 0 14 0 27 1 -3 3 14 69 58 8 -2 1 15 46 44 4 -4 4 15 27 23 26 -5 2 16 73 89 4

14 0 14 32 29 7 -2 3 14 33 7 17 -1 1 15 0 47 1 -3 4 15 47 31 6 -4 2 16 12 31 11

16 0 14 0 9 1 -1 3 14 0 25 1 0 1 15 23 43 23 -2 4 15 0 13 1 -3 2 16 99 88 3

18 0 14 0 17 1 0 3 14 0 6 1 1 1 15 25 33 25 -1 4 15 0 2 1 -2 2 16 32 26 9

-20 1 14 18 15 18 1 3 14 38 9 37 2 1 15 59 68 4 0 4 15 12 1 11 -1 2 16 33 35 9

-19 1 14 13 19 12 2 3 14 0 17 1 3 1 15 25 8 8 1 4 15 24 12 23 0 2 16 29 10 28

-18 1 14 0 13 1 3 3 14 16 22 15 4 1 15 95 97 3 2 4 15 18 28 18 1 2 16 0 22 1

-17 1 14 29 22 10 4 3 14 22 17 22 5 1 15 42 41 5 3 4 15 29 46 29 2 2 16 0 26 1

-16 1 14 0 4 1 5 3 14 27 7 27 6 1 15 0 6 1 4 4 15 0 29 1 3 2 16 42 26 8

-15 1 14 33 15 8 6 3 14 0 15 1 7 1 15 45 37 4 5 4 15 0 8 1 4 2 16 70 68 6

-14 1 14 41 45 6 7 3 14 36 2 36 8 1 15 15 22 14 6 4 15 12 7 12 5 2 16 35 41 34

-13 1 14 15 6 15 8 3 14 42 3 10 9 1 15 24 12 23 7 4 15 28 13 27 6 2 16 26 34 26

-12 1 14 28 22 28 9 3 14 0 5 1 10 1 15 22 1 21 8 4 15 0 8 1 7 2 16 51 48 7

-11 1 14 27 28 10 10 3 14 42 25 41 11 1 15 16 10 15 9 4 15 0 20 1 8 2 16 54 32 6

-10 1 14 28 28 8 11 3 14 0 4 1 12 1 15 32 33 32 10 4 15 0 3 1 9 2 16 49 46 8

-9 1 14 22 36 22 12 3 14 0 8 1 13 1 15 0 18 1 11 4 15 28 6 12 10 2 16 28 3 28

-8 1 14 0 8 1 13 3 14 18 3 18 14 1 15 8 1 7 -5 5 15 0 4 1 11 2 16 32 32 32

-7 1 14 19 20 19 14 3 14 0 16 1 15 1 15 24 18 24 -4 5 15 0 12 1 12 2 16 0 4 1

-6 1 14 25 33 24 15 3 14 38 13 37 16 1 15 43 23 6 -3 5 15 22 4 22 13 2 16 48 18 8

-5 1 14 0 5 1 -13 4 14 18 28 18 17 1 15 18 18 18 -2 5 15 22 6 21 14 2 16 0 3 1

-4 1 14 0 5 1 -12 4 14 22 41 21 -18 2 15 0 16 1 -1 5 15 26 8 26 15 2 16 0 4 1

-3 1 14 33 36 6 -11 4 14 49 42 6 -16 2 15 0 9 1 0 5 15 21 0 20 -16 3 16 48 7 9

-2 1 14 0 14 1 -10 4 14 40 39 7 -15 2 15 31 31 30 1 5 15 18 16 18 -15 3 16 0 21 1

-1 1 14 52 53 4 -9 4 14 21 8 21 -14 2 15 0 4 1 2 5 15 0 7 1 -14 3 16 28 29 28

0 1 14 40 52 5 -8 4 14 0 0 1 -13 2 15 29 41 29 3 5 15 23 22 22 -13 3 16 0 15 1

1 1 14 59 60 3 -7 4 14 0 20 1 -12 2 15 32 4 31 -18 0 16 22 0 21 -12 3 16 48 9 10

2 1 14 24 25 24 -6 4 14 34 23 7 -11 2 15 36 58 35 -16 0 16 32 18 31 -11 3 16 0 4 1

3 1 14 21 31 20 -5 4 14 0 10 1 -10 2 15 0 38 1 -14 0 16 0 8 1 -10 3 16 52 35 11

4 1 14 70 66 3 -4 4 14 0 21 1 -9 2 15 0 16 1 -12 0 16 0 7 1 -9 3 16 30 17 22

5 1 14 27 17 27 -3 4 14 0 6 1 -8 2 15 29 36 29 -10 0 16 10 5 10 -8 3 16 22 23 21

Observed and calculated structure factors for cs2-13f1 Page 8

h k l 10Fo 10Fc 10s h k l 10Fo 10Fc 10s h k l 10Fo 10Fc 10s h k l 10Fo 10Fc 10s h k l 10Fo 10Fc 10s

-7 3 16 0 9 1 14 1 17 17 15 17 0 0 18 18 2 17 7 3 18 0 4 1 8 2 19 36 3 36

-6 3 16 22 21 21 15 1 17 28 29 11 2 0 18 0 25 1 8 3 18 0 4 1 9 2 19 0 15 1

-5 3 16 111 82 5 16 1 17 25 5 13 4 0 18 48 40 5 9 3 18 0 1 1 10 2 19 0 7 1

-4 3 16 21 36 20 -17 2 17 0 4 1 6 0 18 0 4 1 10 3 18 0 9 1 11 2 19 31 19 17

-3 3 16 58 38 7 -16 2 17 18 25 18 8 0 18 25 48 25 11 3 18 0 4 1 12 2 19 38 7 38

-2 3 16 34 13 33 -15 2 17 0 1 1 10 0 18 74 76 4 -9 4 18 32 29 31 13 2 19 25 3 25

-1 3 16 0 16 1 -14 2 17 0 19 1 12 0 18 24 30 23 -8 4 18 23 16 18 -13 3 19 24 2 24

0 3 16 0 3 1 -13 2 17 29 8 29 -18 1 18 15 8 14 -7 4 18 18 15 18 -12 3 19 44 33 12

1 3 16 30 21 30 -12 2 17 0 13 1 -17 1 18 0 21 1 -6 4 18 33 12 8 -11 3 19 0 9 1

2 3 16 0 16 1 -11 2 17 28 16 28 -16 1 18 0 17 1 -5 4 18 18 19 17 -10 3 19 16 18 16

3 3 16 0 3 1 -10 2 17 0 16 1 -15 1 18 6 3 6 -4 4 18 0 8 1 -9 3 19 0 5 1

5 3 16 0 18 1 -9 2 17 0 9 1 -14 1 18 27 5 27 -3 4 18 0 22 1 -8 3 19 0 5 1

6 3 16 0 20 1 -8 2 17 61 60 7 -13 1 18 29 29 29 -2 4 18 22 21 21 -7 3 19 32 4 16

7 3 16 0 13 1 -7 2 17 77 83 5 -12 1 18 11 3 11 -1 4 18 16 22 16 -6 3 19 59 59 8

8 3 16 51 13 8 -6 2 17 43 45 10 -11 1 18 21 16 21 0 4 18 0 25 1 -5 3 19 0 33 1

9 3 16 0 18 1 -5 2 17 72 65 5 -10 1 18 6 19 5 1 4 18 28 20 28 -4 3 19 66 56 8

10 3 16 0 3 1 -4 2 17 32 14 31 -9 1 18 0 2 1 2 4 18 0 4 1 -3 3 19 29 12 23

11 3 16 0 2 1 -3 2 17 38 32 9 -8 1 18 27 3 26 3 4 18 0 8 1 -2 3 19 31 39 31

12 3 16 39 11 13 -2 2 17 37 48 36 -7 1 18 0 11 1 4 4 18 26 5 25 0 3 19 36 17 14

13 3 16 20 8 19 -1 2 17 0 29 1 -6 1 18 28 11 10 5 4 18 0 4 1 1 3 19 25 25 24

-12 4 16 0 11 1 0 2 17 87 70 4 -5 1 18 20 7 19 6 4 18 31 15 10 2 3 19 67 53 6

-11 4 16 0 7 1 1 2 17 41 35 8 -4 1 18 15 17 15 7 4 18 0 3 1 3 3 19 39 11 38

-10 4 16 0 7 1 2 2 17 26 22 26 -3 1 18 21 21 21 -17 0 19 0 30 1 4 3 19 0 11 1

-9 4 16 0 19 1 3 2 17 0 3 1 -2 1 18 21 11 20 -15 0 19 33 23 8 5 3 19 16 9 16

-8 4 16 33 23 32 4 2 17 0 7 1 -1 1 18 43 38 5 -13 0 19 32 10 7 6 3 19 33 10 32

-7 4 16 0 1 1 5 2 17 36 12 35 0 1 18 0 22 1 -11 0 19 27 24 9 7 3 19 33 10 33

-6 4 16 41 26 6 6 2 17 0 10 1 1 1 18 0 30 1 -9 0 19 26 13 10 8 3 19 41 7 10

-5 4 16 32 21 7 7 2 17 14 25 13 2 1 18 30 33 29 -7 0 19 0 32 1 9 3 19 0 29 1

-4 4 16 0 20 1 8 2 17 14 15 14 3 1 18 54 48 4 -5 0 19 11 10 10 10 3 19 39 38 16

-3 4 16 59 70 5 9 2 17 45 29 8 4 1 18 51 41 5 -3 0 19 0 25 1 -7 4 19 32 38 31

-2 4 16 24 21 24 10 2 17 32 33 32 5 1 18 24 16 24 -1 0 19 30 31 29 -6 4 19 18 15 18

-1 4 16 0 11 1 11 2 17 29 5 29 6 1 18 29 9 9 1 0 19 45 50 5 -5 4 19 22 6 22

0 4 16 0 4 1 12 2 17 0 25 1 7 1 18 0 28 1 3 0 19 43 43 6 -4 4 19 0 0 1

1 4 16 0 0 1 13 2 17 0 4 1 8 1 18 24 10 11 5 0 19 26 6 11 -3 4 19 0 15 1

2 4 16 0 9 1 14 2 17 0 1 1 9 1 18 33 18 7 7 0 19 15 19 15 -2 4 19 0 26 1

3 4 16 0 8 1 15 2 17 0 11 1 10 1 18 40 35 6 9 0 19 40 40 6 -1 4 19 0 20 1

4 4 16 0 3 1 -15 3 17 0 14 1 11 1 18 27 26 13 11 0 19 12 7 12 0 4 19 0 1 1

5 4 16 0 7 1 -14 3 17 39 6 38 12 1 18 27 23 11 13 0 19 33 32 33 1 4 19 20 10 20

6 4 16 17 11 17 -13 3 17 0 5 1 13 1 18 18 22 17 -17 1 19 0 8 1 2 4 19 0 28 1

7 4 16 25 14 25 -12 3 17 0 20 1 14 1 18 0 7 1 -16 1 19 8 4 8 3 4 19 0 19 1

8 4 16 18 21 18 -11 3 17 44 19 43 15 1 18 22 24 22 -15 1 19 24 6 15 4 4 19 0 10 1

9 4 16 32 40 11 -10 3 17 0 4 1 -16 2 18 0 8 1 -14 1 19 28 5 27 5 4 19 0 23 1

10 4 16 0 8 1 -9 3 17 22 18 21 -15 2 18 15 10 14 -13 1 19 27 11 27 -16 0 20 45 30 6

-19 0 17 15 9 14 -8 3 17 60 33 8 -14 2 18 0 5 1 -12 1 19 36 19 7 -14 0 20 39 32 7

-17 0 17 33 11 7 -7 3 17 16 3 15 -13 2 18 0 1 1 -11 1 19 0 4 1 -12 0 20 17 29 16

-15 0 17 32 26 9 -6 3 17 46 25 9 -12 2 18 33 41 32 -10 1 19 20 12 19 -10 0 20 30 39 30

-13 0 17 0 27 1 -5 3 17 0 27 1 -11 2 18 0 4 1 -9 1 19 23 14 22 -8 0 20 0 6 1

-11 0 17 19 20 19 -4 3 17 139 111 5 -10 2 18 32 16 31 -8 1 19 0 2 1 -6 0 20 44 32 5

-9 0 17 32 51 31 -3 3 17 107 72 5 -9 2 18 38 22 8 -7 1 19 48 44 6 -4 0 20 56 51 5

-7 0 17 37 32 6 -2 3 17 105 88 5 -8 2 18 42 39 10 -6 1 19 31 22 31 -2 0 20 59 58 4

-5 0 17 0 11 1 -1 3 17 26 24 25 -7 2 18 52 44 8 -5 1 19 0 3 1 0 0 20 54 53 4

-3 0 17 0 9 1 0 3 17 58 50 8 -6 2 18 30 16 30 -4 1 19 19 10 18 2 0 20 34 21 7

-1 0 17 51 54 4 1 3 17 13 10 12 -5 2 18 13 23 13 -3 1 19 31 36 9 4 0 20 52 50 4

1 0 17 48 45 4 2 3 17 52 27 10 -4 2 18 38 53 37 -2 1 19 72 81 3 6 0 20 20 21 19

3 0 17 23 1 10 3 3 17 0 20 1 -3 2 18 43 38 9 -1 1 19 41 42 6 8 0 20 20 2 20

5 0 17 0 17 1 4 3 17 39 23 38 -2 2 18 0 28 1 0 1 19 26 13 26 10 0 20 34 38 9

7 0 17 78 77 3 5 3 17 35 14 13 -1 2 18 72 65 5 1 1 19 0 1 1 12 0 20 30 23 10

9 0 17 78 78 4 6 3 17 39 12 11 0 2 18 0 11 1 2 1 19 0 8 1 -16 1 20 24 6 23

11 0 17 0 15 1 7 3 17 0 21 1 1 2 18 79 71 5 3 1 19 29 33 29 -15 1 20 22 4 22

13 0 17 0 20 1 8 3 17 17 41 16 2 2 18 30 31 29 4 1 19 23 5 13 -14 1 20 25 11 25

15 0 17 0 8 1 9 3 17 0 13 1 3 2 18 0 19 1 5 1 19 28 21 27 -13 1 20 0 10 1

-18 1 17 32 24 8 10 3 17 38 31 37 4 2 18 14 8 13 6 1 19 0 20 1 -12 1 20 24 12 24

-17 1 17 18 24 17 11 3 17 17 15 17 5 2 18 20 14 19 7 1 19 0 22 1 -11 1 20 42 43 7

-16 1 17 0 7 1 12 3 17 0 4 1 6 2 18 0 7 1 8 1 19 39 31 6 -10 1 20 19 17 18

-15 1 17 21 20 20 -11 4 17 28 12 14 7 2 18 28 20 28 9 1 19 27 28 26 -9 1 20 26 23 26

-14 1 17 39 22 7 -10 4 17 22 0 22 8 2 18 17 13 16 10 1 19 31 36 11 -8 1 20 28 20 28

-13 1 17 0 19 1 -9 4 17 8 17 8 9 2 18 32 31 14 11 1 19 29 16 9 -7 1 20 0 8 1

-12 1 17 33 26 7 -8 4 17 10 14 10 10 2 18 26 1 25 12 1 19 28 16 11 -6 1 20 50 45 5

-11 1 17 29 15 29 -7 4 17 28 7 27 11 2 18 30 5 29 13 1 19 22 32 22 -5 1 20 34 21 8

-10 1 17 21 22 19 -6 4 17 0 26 1 12 2 18 0 1 1 14 1 19 26 9 26 -4 1 20 0 6 1

-9 1 17 32 29 7 -5 4 17 0 4 1 13 2 18 0 18 1 -15 2 19 0 1 1 -3 1 20 0 0 1

-8 1 17 0 35 1 -4 4 17 19 24 18 14 2 18 0 10 1 -14 2 19 0 4 1 -2 1 20 51 51 6

-7 1 17 23 1 23 -3 4 17 41 56 8 -14 3 18 0 6 1 -13 2 19 0 22 1 -1 1 20 15 35 15

-6 1 17 46 58 5 -2 4 17 0 13 1 -13 3 18 0 20 1 -12 2 19 24 1 23 0 1 20 31 39 31

-5 1 17 0 4 1 -1 4 17 17 3 16 -12 3 18 0 21 1 -11 2 19 0 4 1 1 1 20 0 38 1

-4 1 17 47 45 4 0 4 17 21 3 21 -11 3 18 30 14 23 -10 2 19 0 6 1 2 1 20 54 62 5

-3 1 17 67 63 3 1 4 17 0 6 1 -10 3 18 14 8 13 -9 2 19 57 43 6 3 1 20 16 22 16

-2 1 17 10 12 10 2 4 17 0 10 1 -9 3 18 0 9 1 -8 2 19 0 4 1 4 1 20 0 1 1

-1 1 17 27 45 26 3 4 17 0 12 1 -8 3 18 22 29 22 -7 2 19 49 45 8 5 1 20 34 12 7

0 1 17 25 3 24 4 4 17 25 1 25 -7 3 18 0 24 1 -6 2 19 39 26 10 6 1 20 31 22 31

1 1 17 0 19 1 5 4 17 0 2 1 -6 3 18 13 11 13 -5 2 19 24 32 23 7 1 20 35 31 8

2 1 17 23 47 22 6 4 17 0 9 1 -5 3 18 0 12 1 -4 2 19 44 35 8 8 1 20 27 12 26

3 1 17 38 28 5 7 4 17 17 15 17 -4 3 18 0 23 1 -3 2 19 36 18 36 9 1 20 40 30 6

4 1 17 41 43 5 8 4 17 48 41 7 -3 3 18 0 24 1 -2 2 19 14 8 13 10 1 20 28 28 13

5 1 17 26 27 10 -18 0 18 22 7 22 -2 3 18 50 44 10 -1 2 19 81 91 6 11 1 20 22 13 21

6 1 17 45 48 6 -16 0 18 0 2 1 -1 3 18 63 45 7 0 2 19 14 23 13 12 1 20 0 6 1

7 1 17 27 27 26 -14 0 18 24 10 23 0 3 18 64 39 6 1 2 19 14 11 13 13 1 20 0 0 1

8 1 17 0 17 1 -12 0 18 0 23 1 1 3 18 0 19 1 2 2 19 34 5 33 -14 2 20 26 6 26

9 1 17 21 26 20 -10 0 18 55 60 5 2 3 18 0 1 1 3 2 19 0 1 1 -13 2 20 33 4 14

10 1 17 48 36 4 -8 0 18 30 31 9 3 3 18 0 15 1 4 2 19 24 11 24 -12 2 20 39 0 12

11 1 17 15 16 14 -6 0 18 44 53 5 4 3 18 22 6 22 5 2 19 28 47 28 -11 2 20 27 14 27

12 1 17 20 21 20 -4 0 18 0 1 1 5 3 18 16 37 15 6 2 19 0 20 1 -10 2 20 35 8 34

13 1 17 0 19 1 -2 0 18 0 15 1 6 3 18 0 10 1 7 2 19 0 30 1 -9 2 20 0 5 1

Observed and calculated structure factors for cs2-13f1 Page 9

h k l 10Fo 10Fc 10s h k l 10Fo 10Fc 10s h k l 10Fo 10Fc 10s h k l 10Fo 10Fc 10s h k l 10Fo 10Fc 10s

-8 2 20 0 5 1 -9 1 21 12 14 11 -6 0 22 65 59 5 5 3 22 0 2 1 -10 1 24 0 10 1

-7 2 20 12 2 12 -8 1 21 29 7 28 -4 0 22 0 19 1 -13 0 23 13 23 13 -9 1 24 22 6 22

-6 2 20 21 50 21 -7 1 21 17 12 16 -2 0 22 23 21 23 -11 0 23 0 16 1 -8 1 24 0 1 1

-5 2 20 26 30 25 -6 1 21 0 37 1 0 0 22 0 4 1 -9 0 23 0 26 1 -7 1 24 25 19 15

-4 2 20 21 45 21 -5 1 21 0 13 1 2 0 22 0 24 1 -7 0 23 0 5 1 -6 1 24 18 17 17

-3 2 20 26 10 25 -4 1 21 16 7 16 4 0 22 0 12 1 -5 0 23 40 45 7 -5 1 24 0 11 1

-2 2 20 26 0 25 -3 1 21 0 24 1 6 0 22 32 31 32 -3 0 23 0 15 1 -4 1 24 0 7 1

-1 2 20 0 30 1 -2 1 21 10 16 9 8 0 22 12 39 12 -1 0 23 32 23 31 -3 1 24 0 0 1

0 2 20 65 66 7 -1 1 21 40 43 7 10 0 22 21 30 21 1 0 23 0 4 1 -2 1 24 21 22 21

1 2 20 39 29 10 0 1 21 0 8 1 -13 1 22 0 0 1 3 0 23 49 43 6 -1 1 24 25 3 24

2 2 20 39 50 14 1 1 21 31 41 12 -12 1 22 0 8 1 5 0 23 28 3 27 0 1 24 30 31 30

3 2 20 21 33 21 2 1 21 0 22 1 -11 1 22 28 3 27 7 0 23 0 6 1 1 1 24 32 31 9

4 2 20 0 23 1 3 1 21 12 30 11 -10 1 22 28 9 27 9 0 23 35 38 11 3 1 24 0 6 1

5 2 20 40 21 40 4 1 21 20 38 20 -9 1 22 38 15 6 -12 1 23 29 9 28 4 1 24 22 24 21

6 2 20 0 12 1 5 1 21 45 29 5 -8 1 22 21 7 21 -11 1 23 0 16 1 5 1 24 35 21 8

7 2 20 20 1 19 6 1 21 40 39 7 -7 1 22 0 7 1 -10 1 23 13 10 12 6 1 24 18 9 18

8 2 20 0 12 1 7 1 21 40 30 6 -6 1 22 39 35 6 -9 1 23 31 5 30 7 1 24 0 13 1

9 2 20 27 20 26 8 1 21 0 11 1 -5 1 22 0 4 1 -8 1 23 12 9 12 -8 2 24 0 11 1

10 2 20 0 16 1 9 1 21 38 34 7 -4 1 22 21 17 21 -7 1 23 0 10 1 -7 2 24 24 2 23

11 2 20 0 17 1 10 1 21 22 25 21 -3 1 22 25 13 13 -6 1 23 0 0 1 -6 2 24 0 9 1

12 2 20 0 1 1 11 1 21 25 3 12 -2 1 22 0 1 1 -5 1 23 0 10 1 -5 2 24 0 6 1

-11 3 20 0 12 1 12 1 21 0 2 1 -1 1 22 29 26 9 -4 1 23 0 1 1 -4 2 24 33 25 32

-10 3 20 29 7 28 -13 2 21 0 13 1 0 1 22 0 6 1 -3 1 23 30 36 29 -3 2 24 19 8 19

-9 3 20 32 2 19 -12 2 21 23 7 23 1 1 22 0 17 1 -2 1 23 0 2 1 -2 2 24 56 23 7

-8 3 20 0 6 1 -11 2 21 0 1 1 2 1 22 0 3 1 -1 1 23 0 32 1 -1 2 24 0 8 1

-6 3 20 28 35 28 -10 2 21 0 23 1 3 1 22 0 15 1 1 1 23 0 0 1 0 2 24 23 3 23

-5 3 20 36 12 14 -9 2 21 0 13 1 4 1 22 0 12 1 2 1 23 0 31 1 1 2 24 28 9 28

-4 3 20 22 17 21 -8 2 21 0 17 1 5 1 22 59 56 4 3 1 23 17 19 17 2 2 24 0 7 1

-3 3 20 35 35 17 -7 2 21 22 2 21 6 1 22 44 40 6 4 1 23 12 11 12 3 2 24 0 1 1

-2 3 20 36 26 35 -6 2 21 0 9 1 7 1 22 16 6 15 5 1 23 37 25 6 4 2 24 17 7 17

-1 3 20 0 31 1 -5 2 21 0 1 1 8 1 22 59 54 5 6 1 23 39 33 7 -9 0 25 0 6 1

0 3 20 0 1 1 -4 2 21 0 24 1 9 1 22 0 21 1 7 1 23 29 15 28 -7 0 25 26 7 25

1 3 20 62 47 7 -3 2 21 0 26 1 10 1 22 32 24 31 8 1 23 18 0 18 -5 0 25 0 17 1

2 3 20 0 12 1 -2 2 21 0 11 1 -12 2 22 17 12 16 9 1 23 26 21 26 -3 0 25 35 29 8

3 3 20 0 4 1 -1 2 21 30 20 30 -11 2 22 0 7 1 -10 2 23 35 2 15 -1 0 25 0 1 1

4 3 20 0 7 1 0 2 21 0 56 1 -10 2 22 32 17 16 -9 2 23 33 16 16 1 0 25 25 29 25

5 3 20 24 3 23 1 2 21 0 17 1 -9 2 22 0 0 1 -8 2 23 21 2 20 3 0 25 0 14 1

6 3 20 37 6 37 2 2 21 40 23 40 -8 2 22 0 1 1 -7 2 23 0 4 1 5 0 25 41 30 7

7 3 20 48 22 11 3 2 21 51 39 8 -7 2 22 22 2 22 -6 2 23 20 16 20 -8 1 25 0 16 1

8 3 20 0 18 1 4 2 21 0 33 1 -6 2 22 0 8 1 -5 2 23 44 20 9 -7 1 25 0 25 1

9 3 20 0 18 1 5 2 21 0 13 1 -5 2 22 0 10 1 -4 2 23 0 2 1 -6 1 25 22 0 22

-4 4 20 28 20 14 6 2 21 35 19 35 -4 2 22 17 17 16 -3 2 23 0 21 1 -5 1 25 0 13 1

-3 4 20 42 28 8 7 2 21 0 2 1 -3 2 22 44 37 9 -2 2 23 0 10 1 -4 1 25 38 36 7

-2 4 20 0 6 1 8 2 21 40 11 12 -2 2 22 0 12 1 -1 2 23 39 3 10 -3 1 25 29 6 28

-1 4 20 24 31 24 9 2 21 0 2 1 -1 2 22 16 1 15 0 2 23 0 10 1 -2 1 25 0 13 1

0 4 20 23 11 22 10 2 21 37 13 37 0 2 22 0 24 1 1 2 23 52 28 8 -1 1 25 0 0 1

1 4 20 31 22 10 -10 3 21 0 2 1 1 2 22 22 8 21 2 2 23 36 4 14 1 1 25 0 3 1

2 4 20 32 16 11 -9 3 21 0 16 1 2 2 22 0 1 1 3 2 23 0 20 1 2 1 25 14 2 13

-15 0 21 0 15 1 -8 3 21 0 7 1 3 2 22 35 1 35 4 2 23 0 5 1 3 1 25 0 5 1

-13 0 21 0 9 1 -7 3 21 36 20 15 4 2 22 0 34 1 5 2 23 0 3 1 4 1 25 0 14 1

-11 0 21 37 35 7 -6 3 21 17 27 16 5 2 22 32 25 32 6 2 23 8 3 8 -3 2 25 33 12 20

-9 0 21 43 33 5 -5 3 21 0 0 1 6 2 22 36 17 36 7 2 23 33 30 23 -2 2 25 0 13 1

-7 0 21 0 5 1 -4 3 21 0 7 1 7 2 22 0 6 1 -4 3 23 9 26 8 -1 2 25 0 11 1

-5 0 21 46 32 5 -3 3 21 39 14 12 8 2 22 0 12 1 -3 3 23 30 8 29 0 2 25 38 17 38

-3 0 21 0 7 1 -2 3 21 16 3 16 9 2 22 0 0 1 -2 3 23 0 5 1 -6 0 26 23 17 22

-1 0 21 56 54 5 -1 3 21 8 16 7 -8 3 22 34 6 34 -1 3 23 46 15 12 -4 0 26 13 24 13

1 0 21 38 37 7 0 3 21 54 45 9 -7 3 22 0 6 1 0 3 23 0 9 1 -2 0 26 22 19 22

3 0 21 79 80 3 1 3 21 0 19 1 -6 3 22 24 12 23 1 3 23 0 10 1 0 0 26 0 15 1

5 0 21 26 49 26 2 3 21 54 43 9 -5 3 22 38 14 37 -10 0 24 31 14 9 2 0 26 26 41 26

7 0 21 23 35 19 3 3 21 24 5 23 -4 3 22 47 27 10 -8 0 24 0 49 1 -4 1 26 19 3 18

9 0 21 0 10 1 4 3 21 17 5 16 -3 3 22 38 1 37 -6 0 24 22 1 21 -3 1 26 29 1 29

11 0 21 39 33 8 5 3 21 41 2 41 -2 3 22 0 3 1 -4 0 24 0 18 1 -2 1 26 0 2 1

-15 1 21 0 9 1 6 3 21 30 2 29 -1 3 22 0 14 1 -2 0 24 44 50 6 -1 1 26 26 0 26

-14 1 21 0 2 1 7 3 21 0 19 1 0 3 22 33 17 33 0 0 24 0 21 1 0 1 26 32 34 32

-13 1 21 0 0 1 -14 0 22 26 5 26 1 3 22 17 1 16 2 0 24 15 13 14

-12 1 21 36 10 7 -12 0 22 0 11 1 2 3 22 32 25 20 4 0 24 0 9 1

-11 1 21 53 48 5 -10 0 22 0 20 1 3 3 22 24 17 24 6 0 24 74 73 5

-10 1 21 0 4 1 -8 0 22 40 47 7 4 3 22 38 26 16 8 0 24 19 20 18

**Table S2** Observed and calculated structure factors for cs2-13f2 Page 1

h k l 10Fo 10Fc 10s h k l 10Fo 10Fc 10s h k l 10Fo 10Fc 10s h k l 10Fo 10Fc 10s h k l 10Fo 10Fc 10s

1 0 0 63 1 2 -3 0 1 79 80 5 12 3 1 0 24 1 -11 1 2 114 105 6 6 4 2 158 162 5

2 0 0 324 336 2 -2 0 1 440 440 3 -11 4 1 55 59 54 -10 1 2 28 41 27 7 4 2 186 192 5

3 0 0 0 9 1 -1 0 1 451 452 2 -10 4 1 0 33 1 -9 1 2 179 174 4 8 4 2 64 61 11

4 0 0 0 30 1 1 0 1 393 392 3 -9 4 1 35 41 35 -8 1 2 170 165 4 9 4 2 0 17 1

5 0 0 89 82 9 2 0 1 437 444 3 -8 4 1 36 66 35 -7 1 2 165 164 3 10 4 2 84 75 9

6 0 0 0 5 1 3 0 1 627 632 4 -7 4 1 38 30 20 -6 1 2 181 177 3 -9 5 2 64 56 13

7 0 0 130 124 3 4 0 1 190 193 3 -6 4 1 118 115 6 -5 1 2 190 189 3 -8 5 2 0 29 1

8 0 0 95 97 4 5 0 1 299 295 5 -5 4 1 0 49 1 -4 1 2 221 218 4 -7 5 2 82 87 8

9 0 0 45 47 45 6 0 1 357 338 5 -4 4 1 141 135 4 -3 1 2 176 182 2 -6 5 2 0 16 1

10 0 0 25 12 25 7 0 1 26 12 25 -3 4 1 208 201 3 -2 1 2 510 526 4 -5 5 2 48 44 15

11 0 0 110 109 4 8 0 1 58 60 9 -2 4 1 158 152 4 -1 1 2 218 220 3 -4 5 2 80 80 8

12 0 0 35 8 21 9 0 1 86 87 7 -1 4 1 99 94 5 0 1 2 617 635 3 -3 5 2 0 32 1

13 0 0 37 11 37 10 0 1 56 55 10 0 4 1 26 29 26 1 1 2 545 559 4 -2 5 2 149 150 5

1 1 0 618 629 8 11 0 1 129 120 6 1 4 1 177 168 4 2 1 2 613 629 4 -1 5 2 0 55 1

2 1 0 242 257 3 12 0 1 28 25 27 2 4 1 112 105 5 3 1 2 365 368 5 0 5 2 73 82 9

3 1 0 351 361 4 13 0 1 72 66 11 3 4 1 90 94 6 4 1 2 68 79 5 1 5 2 121 118 6

4 1 0 83 86 3 -13 1 1 73 57 10 4 4 1 131 129 5 5 1 2 252 246 4 2 5 2 84 78 9

5 1 0 288 277 8 -12 1 1 46 57 19 5 4 1 108 115 6 6 1 2 204 194 3 3 5 2 147 142 5

6 1 0 94 93 3 -11 1 1 8 35 7 6 4 1 111 117 6 7 1 2 172 171 4 4 5 2 130 127 6

7 1 0 111 111 7 -10 1 1 117 120 6 7 4 1 55 58 12 8 1 2 157 144 4 5 5 2 148 142 5

8 1 0 73 75 5 -9 1 1 174 169 4 8 4 1 107 106 7 9 1 2 82 85 8 6 5 2 46 44 45

9 1 0 117 110 4 -8 1 1 20 14 19 9 4 1 54 73 53 10 1 2 28 29 28 7 5 2 77 74 10

10 1 0 14 36 14 -7 1 1 133 137 4 10 4 1 0 40 1 11 1 2 42 28 42 8 5 2 0 8 1

11 1 0 59 65 8 -6 1 1 115 110 4 11 4 1 0 35 1 12 1 2 0 53 1 9 5 2 27 20 27

12 1 0 41 57 18 -5 1 1 225 221 4 -9 5 1 47 10 46 13 1 2 0 27 1 -7 6 2 0 15 1

13 1 0 25 27 25 -4 1 1 258 258 4 -8 5 1 0 38 1 -13 2 2 0 25 1 -6 6 2 19 22 18

0 2 0 43 44 10 -3 1 1 17 5 17 -7 5 1 40 37 39 -12 2 2 40 34 19 -5 6 2 45 36 44

1 2 0 296 291 3 -2 1 1 74 73 5 -6 5 1 94 87 7 -11 2 2 0 56 1 -4 6 2 0 29 1

2 2 0 284 295 3 -1 1 1 528 533 3 -5 5 1 61 62 11 -10 2 2 115 118 5 -3 6 2 35 15 35

3 2 0 380 379 7 0 1 1 805 815 3 -4 5 1 0 27 1 -9 2 2 176 177 4 -2 6 2 46 30 46

4 2 0 96 101 3 1 1 1 585 592 3 -3 5 1 184 178 4 -8 2 2 79 90 7 -1 6 2 42 36 41

5 2 0 147 150 2 2 1 1 536 531 4 -2 5 1 133 133 6 -7 2 2 79 76 6 0 6 2 88 73 7

6 2 0 113 104 5 3 1 1 258 275 4 -1 5 1 216 210 4 -6 2 2 39 47 11 1 6 2 117 127 7

7 2 0 33 46 18 4 1 1 278 285 4 0 5 1 130 124 5 -5 2 2 77 78 5 2 6 2 58 47 13

8 2 0 43 37 11 5 1 1 347 337 5 1 5 1 194 187 4 -4 2 2 174 177 3 3 6 2 0 51 1

9 2 0 67 73 8 6 1 1 38 50 11 2 5 1 138 138 6 -3 2 2 180 175 3 4 6 2 114 117 7

10 2 0 119 119 4 7 1 1 107 98 5 3 5 1 60 67 12 -2 2 2 253 263 4 5 6 2 70 43 10

11 2 0 0 7 1 8 1 1 83 85 6 4 5 1 0 42 1 -1 2 2 170 170 3 6 6 2 0 22 1

12 2 0 0 9 1 9 1 1 198 193 4 5 5 1 33 82 33 0 2 2 125 125 3 7 6 2 28 45 27

1 3 0 58 50 9 10 1 1 97 101 7 6 5 1 0 35 1 1 2 2 0 5 1 -2 7 2 56 42 15

2 3 0 344 330 5 11 1 1 49 52 48 7 5 1 68 71 11 2 2 2 228 222 4 -1 7 2 17 23 16

3 3 0 105 104 3 12 1 1 83 68 9 8 5 1 26 22 26 3 2 2 126 122 3 0 7 2 26 31 26

4 3 0 113 117 3 13 1 1 0 19 1 9 5 1 0 48 1 4 2 2 38 49 37 1 7 2 0 27 1

5 3 0 72 75 4 -13 2 1 77 65 11 -7 6 1 41 16 25 5 2 2 40 41 10 2 7 2 0 7 1

6 3 0 77 81 4 -12 2 1 26 20 25 -6 6 1 67 35 10 6 2 2 70 58 6 -13 0 3 64 76 13

7 3 0 70 65 6 -11 2 1 0 49 1 -5 6 1 0 52 1 7 2 2 159 165 4 -12 0 3 0 7 1

8 3 0 34 16 13 -10 2 1 122 130 5 -4 6 1 26 6 25 8 2 2 96 117 6 -11 0 3 105 108 6

9 3 0 55 52 7 -9 2 1 125 128 5 -3 6 1 39 67 39 9 2 2 138 135 5 -10 0 3 50 64 50

10 3 0 54 67 21 -8 2 1 55 49 8 -2 6 1 112 113 7 10 2 2 34 48 33 -9 0 3 69 75 8

11 3 0 63 61 14 -7 2 1 0 8 1 -1 6 1 62 53 11 11 2 2 0 46 1 -8 0 3 0 50 1

12 3 0 20 26 19 -6 2 1 95 97 4 0 6 1 126 117 6 12 2 2 26 20 26 -7 0 3 129 133 4

0 4 0 273 261 4 -5 2 1 306 306 5 1 6 1 103 104 7 -12 3 2 38 30 38 -6 0 3 177 179 3

1 4 0 78 68 11 -4 2 1 208 204 4 2 6 1 133 129 7 -11 3 2 44 55 18 -5 0 3 64 55 6

2 4 0 61 72 12 -3 2 1 155 152 3 3 6 1 0 53 1 -10 3 2 112 104 6 -4 0 3 182 180 3

3 4 0 184 181 2 -2 2 1 161 159 3 4 6 1 76 84 10 -9 3 2 0 36 1 -3 0 3 54 61 7

4 4 0 33 6 33 -1 2 1 306 301 5 5 6 1 0 36 1 -8 3 2 92 89 6 -2 0 3 394 400 4

5 4 0 59 58 7 0 2 1 137 136 3 6 6 1 19 38 18 -7 3 2 75 77 8 -1 0 3 486 504 3

6 4 0 93 88 4 1 2 1 254 259 4 7 6 1 34 25 33 -6 3 2 62 66 8 0 0 3 123 131 2

7 4 0 92 90 5 2 2 1 107 115 4 -3 7 1 0 13 1 -5 3 2 48 48 9 1 0 3 756 738 3

8 4 0 94 93 5 3 2 1 231 230 3 -2 7 1 0 42 1 -4 3 2 144 140 4 2 0 3 664 664 4

9 4 0 36 28 22 4 2 1 177 174 3 -1 7 1 27 25 27 -3 3 2 118 113 4 3 0 3 410 408 4

10 4 0 41 40 16 5 2 1 216 214 3 0 7 1 75 63 10 -2 3 2 187 183 3 4 0 3 102 95 3

11 4 0 0 14 1 6 2 1 159 158 3 1 7 1 19 8 18 -1 3 2 145 142 3 5 0 3 326 311 5

1 5 0 294 290 3 7 2 1 69 82 7 2 7 1 28 43 27 0 3 2 207 202 3 6 0 3 168 166 3

2 5 0 84 85 6 8 2 1 71 69 8 -13 0 2 102 92 8 1 3 2 280 254 4 7 0 3 149 148 4

3 5 0 53 44 12 9 2 1 165 158 5 -12 0 2 186 176 5 2 3 2 105 98 4 8 0 3 20 17 20

4 5 0 64 64 7 10 2 1 134 144 6 -11 0 2 89 78 7 3 3 2 223 203 3 9 0 3 0 8 1

5 5 0 43 24 32 11 2 1 0 30 1 -10 0 2 104 106 7 4 3 2 99 103 5 10 0 3 37 13 36

6 5 0 0 16 1 12 2 1 33 40 33 -9 0 2 119 123 5 5 3 2 65 66 7 11 0 3 63 46 8

7 5 0 45 52 31 -12 3 1 0 18 1 -8 0 2 67 62 7 6 3 2 34 41 19 12 0 3 18 1 18

8 5 0 96 85 5 -11 3 1 36 7 35 -7 0 2 91 86 5 7 3 2 40 58 39 13 0 3 27 33 27

9 5 0 0 29 1 -10 3 1 29 7 28 -6 0 2 47 47 9 8 3 2 238 247 4 -13 1 3 27 36 26

0 6 0 144 147 6 -9 3 1 91 103 7 -5 0 2 163 162 3 9 3 2 41 42 17 -12 1 3 50 64 50

1 6 0 116 100 9 -8 3 1 85 93 7 -4 0 2 223 220 4 10 3 2 80 82 8 -11 1 3 91 94 7

2 6 0 204 206 3 -7 3 1 80 69 6 -3 0 2 336 341 4 11 3 2 63 49 12 -10 1 3 160 167 5

3 6 0 43 63 20 -6 3 1 25 36 24 -2 0 2 0 18 1 12 3 2 0 21 1 -9 1 3 82 82 7

4 6 0 51 49 28 -5 3 1 67 68 6 -1 0 2 213 216 3 -11 4 2 33 13 33 -8 1 3 91 94 5

5 6 0 0 33 1 -4 3 1 157 153 3 0 0 2 392 396 2 -10 4 2 138 146 6 -7 1 3 159 159 4

6 6 0 41 25 20 -3 3 1 265 266 4 1 0 2 56 55 5 -9 4 2 57 44 10 -6 1 3 90 82 4

7 6 0 30 33 29 -2 3 1 37 18 12 2 0 2 183 183 3 -8 4 2 45 59 44 -5 1 3 213 215 3

1 7 0 38 22 37 -1 3 1 89 88 5 3 0 2 220 219 4 -7 4 2 62 47 9 -4 1 3 37 37 11

2 7 0 0 28 1 0 3 1 128 121 3 4 0 2 371 372 5 -6 4 2 97 95 6 -3 1 3 74 89 5

3 7 0 0 17 1 1 3 1 169 165 3 5 0 2 383 377 5 -5 4 2 117 118 6 -2 1 3 478 511 4

-13 0 1 46 56 22 2 3 1 278 274 4 6 0 2 529 502 6 -4 4 2 47 52 12 -1 1 3 911 901 4

-12 0 1 44 56 43 3 3 1 0 44 1 7 0 2 145 141 4 -3 4 2 123 126 5 0 1 3 190 198 3

-11 0 1 0 14 1 4 3 1 166 153 3 8 0 2 0 0 1 -2 4 2 51 46 10 1 1 3 468 475 4

-10 0 1 32 18 31 5 3 1 56 55 8 9 0 2 0 24 1 -1 4 2 87 88 5 2 1 3 308 327 5

-9 0 1 95 93 7 6 3 1 93 86 5 10 0 2 40 52 39 0 4 2 81 90 6 3 1 3 119 128 3

-8 0 1 70 69 7 7 3 1 87 75 6 11 0 2 63 61 10 1 4 2 80 73 6 4 1 3 502 495 5

-7 0 1 170 170 3 8 3 1 216 223 4 12 0 2 0 46 1 2 4 2 99 103 6 5 1 3 38 79 38

-6 0 1 98 92 4 9 3 1 115 131 7 13 0 2 34 31 33 3 4 2 0 48 1 6 1 3 103 106 4

-5 0 1 193 188 3 10 3 1 71 71 9 -13 1 2 46 4 46 4 4 2 29 57 29 7 1 3 40 53 40

-4 0 1 131 132 3 11 3 1 0 29 1 -12 1 2 31 16 31 5 4 2 151 151 5 8 1 3 160 154 4

Observed and calculated structure factors for cs2-13f2 Page 2

h k l 10Fo 10Fc 10s h k l 10Fo 10Fc 10s h k l 10Fo 10Fc 10s h k l 10Fo 10Fc 10s h k l 10Fo 10Fc 10s

9 1 3 105 103 6 7 5 3 58 55 13 7 2 4 20 56 20 -9 0 5 321 324 5 8 3 5 64 52 10

10 1 3 61 57 10 8 5 3 0 41 1 8 2 4 282 285 4 -8 0 5 76 85 7 9 3 5 0 25 1

11 1 3 39 30 38 9 5 3 51 28 51 9 2 4 114 124 6 -7 0 5 0 21 1 10 3 5 55 39 11

12 1 3 0 13 1 -6 6 3 46 60 21 10 2 4 73 57 8 -6 0 5 0 40 1 11 3 5 45 6 19

13 1 3 48 66 47 -5 6 3 49 24 48 11 2 4 0 8 1 -5 0 5 163 165 3 -11 4 5 98 94 8

-13 2 3 0 38 1 -4 6 3 0 34 1 12 2 4 42 20 42 -4 0 5 186 180 3 -10 4 5 0 14 1

-12 2 3 0 11 1 -3 6 3 0 43 1 -12 3 4 0 13 1 -3 0 5 186 187 3 -9 4 5 121 129 6

-11 2 3 0 56 1 -2 6 3 68 60 10 -11 3 4 60 64 13 -2 0 5 743 755 4 -8 4 5 95 103 6

-10 2 3 0 12 1 -1 6 3 48 82 48 -10 3 4 25 27 24 -1 0 5 1629 1540 4 -7 4 5 89 91 7

-9 2 3 122 120 5 0 6 3 38 46 38 -9 3 4 17 42 16 0 0 5 449 454 4 -6 4 5 30 8 29

-8 2 3 60 53 8 1 6 3 46 23 18 -8 3 4 71 58 8 1 0 5 298 300 5 -5 4 5 0 17 1

-7 2 3 101 108 5 2 6 3 39 37 39 -7 3 4 0 14 1 2 0 5 0 5 1 -4 4 5 46 34 45

-6 2 3 78 75 5 3 6 3 100 97 8 -6 3 4 43 35 42 3 0 5 246 251 4 -3 4 5 34 41 34

-5 2 3 32 21 31 4 6 3 61 68 14 -5 3 4 100 102 5 4 0 5 575 547 5 -2 4 5 59 61 9

-4 2 3 56 66 7 5 6 3 0 27 1 -4 3 4 149 151 4 5 0 5 220 207 3 -1 4 5 120 119 5

-3 2 3 272 263 4 6 6 3 0 19 1 -3 3 4 93 81 5 6 0 5 13 5 12 0 4 5 87 84 6

-2 2 3 157 153 3 -2 7 3 59 55 13 -2 3 4 108 103 4 7 0 5 184 178 4 1 4 5 64 59 8

-1 2 3 269 272 4 -1 7 3 38 28 37 -1 3 4 89 84 4 8 0 5 122 124 5 2 4 5 125 124 5

0 2 3 85 80 4 0 7 3 46 44 46 0 3 4 104 99 4 9 0 5 98 106 7 3 4 5 63 71 9

1 2 3 300 296 4 1 7 3 27 68 27 1 3 4 216 198 3 10 0 5 100 99 7 4 4 5 113 118 6

2 2 3 325 317 5 2 7 3 55 56 54 2 3 4 190 195 3 11 0 5 0 34 1 5 4 5 35 24 34

3 2 3 76 71 5 -13 0 4 0 8 1 3 3 4 117 103 4 12 0 5 0 4 1 6 4 5 36 45 36

4 2 3 134 130 3 -12 0 4 36 15 35 4 3 4 178 174 3 -13 1 5 0 38 1 7 4 5 83 81 7

5 2 3 59 66 6 -11 0 4 72 82 9 5 3 4 92 95 5 -12 1 5 72 79 10 8 4 5 0 21 1

6 2 3 59 65 7 -10 0 4 261 260 4 6 3 4 96 100 6 -11 1 5 82 77 8 9 4 5 0 36 1

7 2 3 66 66 8 -9 0 4 0 5 1 7 3 4 182 183 4 -10 1 5 212 208 4 10 4 5 42 11 42

8 2 3 98 105 7 -8 0 4 67 48 7 8 3 4 43 40 15 -9 1 5 93 99 7 -9 5 5 83 101 9

9 2 3 24 27 24 -7 0 4 0 11 1 9 3 4 73 90 9 -8 1 5 85 93 6 -8 5 5 45 59 44

10 2 3 45 71 44 -6 0 4 264 251 4 10 3 4 50 41 13 -7 1 5 107 108 5 -7 5 5 67 72 9

11 2 3 47 66 47 -5 0 4 74 75 5 11 3 4 42 14 42 -6 1 5 206 196 3 -6 5 5 46 61 18

12 2 3 50 16 49 -4 0 4 225 234 3 -11 4 4 19 25 19 -5 1 5 76 82 5 -5 5 5 0 20 1

-12 3 3 38 30 38 -3 0 4 58 56 6 -10 4 4 65 70 12 -4 1 5 232 234 4 -4 5 5 36 41 36

-11 3 3 45 48 44 -2 0 4 920 925 4 -9 4 4 35 69 35 -3 1 5 154 160 3 -3 5 5 101 106 6

-10 3 3 46 61 45 -1 0 4 149 153 2 -8 4 4 91 93 7 -2 1 5 266 270 4 -2 5 5 22 31 21

-9 3 3 102 107 6 0 0 4 78 84 4 -7 4 4 97 100 6 -1 1 5 633 650 4 -1 5 5 98 93 6

-8 3 3 77 70 7 1 0 4 257 261 4 -6 4 4 47 53 12 0 1 5 239 240 4 0 5 5 143 132 5

-7 3 3 39 62 39 2 0 4 175 173 3 -5 4 4 95 87 6 1 1 5 423 422 4 1 5 5 0 27 1

-6 3 3 70 63 6 3 0 4 166 169 3 -4 4 4 32 38 32 2 1 5 150 152 3 2 5 5 63 53 10

-5 3 3 83 84 5 4 0 4 141 140 3 -3 4 4 109 101 5 3 1 5 26 56 25 3 5 5 0 29 1

-4 3 3 243 233 4 5 0 4 71 51 6 -2 4 4 175 174 4 4 1 5 280 280 4 4 5 5 47 55 47

-3 3 3 143 139 3 6 0 4 28 12 28 -1 4 4 80 93 6 5 1 5 58 55 7 5 5 5 80 92 10

-2 3 3 255 242 4 7 0 4 0 3 1 0 4 4 172 173 4 6 1 5 68 59 6 6 5 5 80 76 9

-1 3 3 134 124 3 8 0 4 0 27 1 1 4 4 98 92 6 7 1 5 37 35 36 7 5 5 45 64 44

0 3 3 305 302 5 9 0 4 54 30 10 2 4 4 62 64 9 8 1 5 0 37 1 8 5 5 0 39 1

1 3 3 140 127 4 10 0 4 0 26 1 3 4 4 168 170 4 9 1 5 56 57 11 -7 6 5 27 19 27

2 3 3 147 141 3 11 0 4 25 62 24 4 4 4 119 115 6 10 1 5 72 74 8 -6 6 5 0 37 1

3 3 3 153 151 4 12 0 4 0 26 1 5 4 4 114 127 6 11 1 5 0 46 1 -5 6 5 0 28 1

4 3 3 117 116 5 -13 1 4 63 57 12 6 4 4 182 179 4 12 1 5 34 7 33 -4 6 5 44 41 43

5 3 3 105 102 5 -12 1 4 119 109 6 7 4 4 47 71 46 -12 2 5 32 19 31 -3 6 5 97 101 8

6 3 3 127 129 5 -11 1 4 110 101 6 8 4 4 0 43 1 -11 2 5 100 98 7 -2 6 5 98 93 7

7 3 3 178 176 4 -10 1 4 164 150 5 9 4 4 26 47 25 -10 2 5 102 114 7 -1 6 5 0 77 1

8 3 3 42 8 42 -9 1 4 96 97 6 10 4 4 0 18 1 -9 2 5 74 73 7 0 6 5 36 31 26

9 3 3 90 94 7 -8 1 4 114 110 4 -9 5 4 70 78 12 -8 2 5 0 17 1 1 6 5 43 18 42

10 3 3 37 33 22 -7 1 4 187 188 3 -8 5 4 0 36 1 -7 2 5 78 78 6 2 6 5 67 78 12

11 3 3 0 26 1 -6 1 4 62 47 6 -7 5 4 31 45 30 -6 2 5 0 33 1 3 6 5 0 28 1

-11 4 3 77 66 9 -5 1 4 154 152 3 -6 5 4 112 105 6 -5 2 5 41 53 40 4 6 5 37 17 36

-10 4 3 45 40 44 -4 1 4 186 193 3 -5 5 4 47 50 47 -4 2 5 180 188 3 5 6 5 0 41 1

-9 4 3 105 107 7 -3 1 4 174 178 3 -4 5 4 0 62 1 -3 2 5 142 144 3 6 6 5 0 47 1

-8 4 3 110 124 6 -2 1 4 574 592 4 -3 5 4 78 64 7 -2 2 5 130 133 3 -13 0 6 38 41 37

-7 4 3 127 128 5 -1 1 4 361 376 4 -2 5 4 0 34 1 -1 2 5 48 45 7 -12 0 6 76 71 9

-6 4 3 62 62 9 0 1 4 284 298 4 -1 5 4 124 122 5 0 2 5 179 185 3 -11 0 6 0 64 1

-5 4 3 39 28 39 1 1 4 473 486 4 0 5 4 31 96 30 1 2 5 494 494 5 -10 0 6 93 94 7

-4 4 3 72 74 7 2 1 4 233 229 4 1 5 4 87 83 7 2 2 5 276 277 4 -9 0 6 56 40 9

-3 4 3 88 87 6 3 1 4 371 383 5 2 5 4 86 88 9 3 2 5 181 184 3 -8 0 6 0 11 1

-2 4 3 157 168 4 4 1 4 253 252 4 3 5 4 104 111 7 4 2 5 210 221 3 -7 0 6 89 88 5

-1 4 3 73 76 7 5 1 4 160 162 3 4 5 4 28 44 28 5 2 5 114 115 4 -6 0 6 28 34 27

0 4 3 124 121 4 6 1 4 77 72 6 5 5 4 93 100 9 6 2 5 146 148 4 -5 0 6 269 268 4

1 4 3 97 94 5 7 1 4 214 214 3 6 5 4 46 47 46 7 2 5 223 229 4 -4 0 6 325 326 5

2 4 3 53 55 11 8 1 4 25 54 25 7 5 4 21 19 21 8 2 5 38 30 37 -3 0 6 490 491 5

3 4 3 69 68 8 9 1 4 153 152 5 8 5 4 46 50 45 9 2 5 25 11 24 -2 0 6 84 78 4

4 4 3 33 40 32 10 1 4 98 97 7 9 5 4 55 51 54 10 2 5 45 26 45 -1 0 6 525 527 4

5 4 3 144 144 5 11 1 4 51 39 13 -7 6 4 61 60 15 11 2 5 54 22 12 0 0 6 227 221 4

6 4 3 86 91 8 12 1 4 37 24 37 -6 6 4 0 18 1 12 2 5 33 13 33 1 0 6 249 251 4

7 4 3 42 44 18 -13 2 4 0 25 1 -5 6 4 0 25 1 -12 3 5 51 31 14 2 0 6 103 107 4

8 4 3 69 73 9 -12 2 4 50 29 15 -4 6 4 47 27 15 -11 3 5 82 75 8 3 0 6 340 340 5

9 4 3 99 96 7 -11 2 4 25 33 24 -3 6 4 39 51 25 -10 3 5 0 50 1 4 0 6 36 38 36

10 4 3 33 13 32 -10 2 4 16 11 16 -2 6 4 91 89 8 -9 3 5 53 54 11 5 0 6 222 214 3

-9 5 3 44 21 18 -9 2 4 106 112 6 -1 6 4 24 33 24 -8 3 5 77 82 8 6 0 6 276 260 4

-8 5 3 38 11 22 -8 2 4 50 43 10 0 6 4 124 137 6 -7 3 5 0 10 1 7 0 6 69 65 7

-7 5 3 25 13 24 -7 2 4 157 157 4 1 6 4 56 42 12 -6 3 5 32 17 32 8 0 6 92 101 7

-6 5 3 64 53 10 -6 2 4 221 215 3 2 6 4 43 67 43 -5 3 5 0 24 1 9 0 6 0 37 1

-5 5 3 90 82 7 -5 2 4 181 176 3 3 6 4 58 52 12 -4 3 5 52 49 9 10 0 6 89 86 8

-4 5 3 62 71 11 -4 2 4 0 25 1 4 6 4 0 4 1 -3 3 5 119 116 4 11 0 6 31 29 30

-3 5 3 130 145 6 -3 2 4 216 224 3 5 6 4 37 15 37 -2 3 5 229 222 4 12 0 6 38 32 37

-2 5 3 155 157 5 -2 2 4 168 163 3 6 6 4 68 64 12 -1 3 5 203 189 3 -13 1 6 33 25 32

-1 5 3 115 115 6 -1 2 4 319 302 5 -2 7 4 38 22 38 0 3 5 305 289 4 -12 1 6 103 98 8

0 5 3 144 132 5 0 2 4 53 50 7 -1 7 4 0 16 1 1 3 5 245 230 4 -11 1 6 68 71 8

1 5 3 125 132 5 1 2 4 285 268 4 0 7 4 59 43 15 2 3 5 126 119 4 -10 1 6 28 47 27

2 5 3 128 131 6 2 2 4 234 231 3 1 7 4 0 22 1 3 3 5 127 123 4 -9 1 6 201 209 4

3 5 3 121 113 5 3 2 4 154 158 3 -13 0 5 45 31 19 4 3 5 130 121 4 -8 1 6 32 22 20

4 5 3 82 71 8 4 2 4 175 172 3 -12 0 5 164 164 6 5 3 5 68 68 7 -7 1 6 128 122 4

5 5 3 95 89 7 5 2 4 81 85 5 -11 0 5 41 30 41 6 3 5 258 258 4 -6 1 6 34 31 12

6 5 3 115 126 7 6 2 4 0 53 1 -10 0 5 36 49 35 7 3 5 101 105 7 -5 1 6 312 318 5

Observed and calculated structure factors for cs2-13f2 Page 3

h k l 10Fo 10Fc 10s h k l 10Fo 10Fc 10s h k l 10Fo 10Fc 10s h k l 10Fo 10Fc 10s h k l 10Fo 10Fc 10s

-4 1 6 196 201 3 -3 5 6 50 60 14 5 2 7 72 60 7 1 0 8 120 128 3 2 4 8 39 40 20

-3 1 6 278 273 4 -2 5 6 131 132 5 6 2 7 134 138 5 2 0 8 111 108 4 3 4 8 0 34 1

-2 1 6 474 479 5 -1 5 6 27 45 27 7 2 7 120 119 5 3 0 8 415 401 6 4 4 8 133 136 5

-1 1 6 47 45 7 0 5 6 131 122 5 8 2 7 164 178 5 4 0 8 141 134 4 5 4 8 144 138 5

0 1 6 413 432 5 1 5 6 59 45 11 9 2 7 34 28 26 5 0 8 118 118 4 6 4 8 80 81 7

1 1 6 201 205 3 2 5 6 0 12 1 10 2 7 64 66 12 6 0 8 0 1 1 7 4 8 0 17 1

2 1 6 168 172 3 3 5 6 0 21 1 11 2 7 0 32 1 7 0 8 39 15 39 8 4 8 79 82 9

3 1 6 173 173 3 4 5 6 32 39 32 -11 3 7 23 27 22 8 0 8 42 2 41 9 4 8 0 21 1

4 1 6 120 118 4 5 5 6 64 54 11 -10 3 7 0 37 1 9 0 8 100 101 7 -8 5 8 0 26 1

5 1 6 118 119 4 6 5 6 24 5 24 -9 3 7 75 64 8 10 0 8 25 1 24 -7 5 8 77 74 9

6 1 6 19 58 19 7 5 6 64 58 12 -8 3 7 93 102 7 11 0 8 52 21 52 -6 5 8 46 65 46

7 1 6 49 44 10 8 5 6 27 5 26 -7 3 7 0 41 1 -12 1 8 0 45 1 -5 5 8 116 113 6

8 1 6 96 100 7 -6 6 6 0 34 1 -6 3 7 134 135 5 -11 1 8 0 38 1 -4 5 8 122 122 6

9 1 6 39 55 17 -5 6 6 0 31 1 -5 3 7 59 58 8 -10 1 8 60 68 10 -3 5 8 70 58 9

10 1 6 64 66 11 -4 6 6 46 43 18 -4 3 7 139 141 4 -9 1 8 157 161 5 -2 5 8 23 29 23

11 1 6 40 40 21 -3 6 6 81 81 8 -3 3 7 73 68 6 -8 1 8 185 181 4 -1 5 8 62 69 10

12 1 6 0 20 1 -2 6 6 60 55 12 -2 3 7 114 110 4 -7 1 8 73 70 6 0 5 8 0 28 1

-12 2 6 63 66 12 -1 6 6 145 147 6 -1 3 7 87 85 6 -6 1 8 156 157 3 1 5 8 16 52 16

-11 2 6 30 25 30 0 6 6 66 44 10 0 3 7 119 117 4 -5 1 8 35 61 34 2 5 8 103 108 7

-10 2 6 76 76 8 1 6 6 35 39 35 1 3 7 166 153 3 -4 1 8 74 76 5 3 5 8 41 22 18

-9 2 6 64 78 9 2 6 6 44 48 43 2 3 7 79 85 6 -3 1 8 247 241 4 4 5 8 59 55 12

-8 2 6 63 61 8 3 6 6 92 83 9 3 3 7 84 83 6 -2 1 8 128 131 3 5 5 8 25 55 25

-7 2 6 67 62 7 4 6 6 42 47 41 4 3 7 72 65 7 -1 1 8 288 295 5 6 5 8 45 26 44

-6 2 6 221 223 3 5 6 6 43 46 42 5 3 7 240 240 4 0 1 8 136 143 3 7 5 8 45 34 20

-5 2 6 118 113 4 -13 0 7 33 6 32 6 3 7 212 218 4 1 1 8 149 152 3 -6 6 8 51 25 50

-4 2 6 167 164 3 -12 0 7 18 24 18 7 3 7 333 337 5 2 1 8 213 214 3 -5 6 8 57 38 14

-3 2 6 121 120 3 -11 0 7 0 14 1 8 3 7 0 37 1 3 1 8 280 278 4 -4 6 8 0 31 1

-2 2 6 282 282 5 -10 0 7 88 84 7 9 3 7 70 55 9 4 1 8 171 162 3 -3 6 8 31 49 31

-1 2 6 96 92 4 -9 0 7 165 159 5 10 3 7 52 18 15 5 1 8 90 78 5 -2 6 8 70 59 11

0 2 6 337 328 5 -8 0 7 32 28 32 -10 4 7 37 47 36 6 1 8 95 100 5 -1 6 8 0 23 1

1 2 6 366 358 6 -7 0 7 38 31 38 -9 4 7 0 5 1 7 1 8 100 100 6 0 6 8 43 37 23

2 2 6 133 131 3 -6 0 7 90 94 5 -8 4 7 48 50 48 8 1 8 100 100 6 1 6 8 61 55 12

3 2 6 242 244 4 -5 0 7 97 91 4 -7 4 7 177 176 5 9 1 8 45 45 14 2 6 8 0 2 1

4 2 6 67 74 6 -4 0 7 545 529 5 -6 4 7 64 64 10 10 1 8 0 37 1 3 6 8 103 102 8

5 2 6 183 197 3 -3 0 7 568 557 5 -5 4 7 123 121 5 11 1 8 46 17 45 4 6 8 44 52 23

6 2 6 167 166 4 -2 0 7 164 162 3 -4 4 7 82 92 7 -12 2 8 107 92 6 -12 0 9 0 38 1

7 2 6 153 152 5 -1 0 7 62 52 5 -3 4 7 97 100 6 -11 2 8 73 56 8 -11 0 9 25 22 24

8 2 6 47 54 46 0 0 7 139 143 3 -2 4 7 189 183 4 -10 2 8 76 65 8 -10 0 9 47 67 47

9 2 6 90 84 6 1 0 7 132 134 3 -1 4 7 78 75 7 -9 2 8 53 58 11 -9 0 9 79 76 7

10 2 6 46 23 45 2 0 7 192 202 3 0 4 7 0 41 1 -8 2 8 113 108 6 -8 0 9 0 10 1

11 2 6 26 16 25 3 0 7 129 136 3 1 4 7 59 61 9 -7 2 8 79 81 7 -7 0 9 42 53 42

-12 3 6 0 34 1 4 0 7 34 36 16 2 4 7 15 25 14 -6 2 8 106 98 5 -6 0 9 114 116 5

-11 3 6 0 10 1 5 0 7 61 60 7 3 4 7 114 113 6 -5 2 8 132 130 4 -5 0 9 121 114 4

-10 3 6 57 34 10 6 0 7 39 37 13 4 4 7 49 33 48 -4 2 8 90 102 5 -4 0 9 123 116 4

-9 3 6 121 124 6 7 0 7 63 48 8 5 4 7 192 195 4 -3 2 8 113 112 4 -3 0 9 50 51 8

-8 3 6 0 23 1 8 0 7 42 41 16 6 4 7 97 102 7 -2 2 8 99 97 4 -2 0 9 74 69 5

-7 3 6 30 26 30 9 0 7 100 101 7 7 4 7 0 42 1 -1 2 8 114 105 3 -1 0 9 170 169 3

-6 3 6 0 17 1 10 0 7 34 27 34 8 4 7 36 59 35 0 2 8 210 207 4 0 0 9 27 15 27

-5 3 6 154 154 4 11 0 7 0 55 1 9 4 7 19 16 18 1 2 8 81 72 4 1 0 9 151 147 3

-4 3 6 121 118 4 12 0 7 49 37 17 -9 5 7 27 13 27 2 2 8 128 125 4 2 0 9 185 182 3

-3 3 6 38 50 38 -13 1 7 0 57 1 -8 5 7 26 42 26 3 2 8 155 156 3 3 0 9 0 36 1

-2 3 6 73 85 6 -12 1 7 0 23 1 -7 5 7 73 69 10 4 2 8 132 137 4 4 0 9 195 194 3

-1 3 6 135 124 4 -11 1 7 30 25 29 -6 5 7 105 103 7 5 2 8 49 52 9 5 0 9 85 76 6

0 3 6 270 266 4 -10 1 7 116 114 6 -5 5 7 99 93 7 6 2 8 317 328 5 6 0 9 0 19 1

1 3 6 299 277 5 -9 1 7 96 93 6 -4 5 7 80 82 8 7 2 8 106 113 6 7 0 9 60 45 10

2 3 6 96 97 5 -8 1 7 195 199 4 -3 5 7 134 132 5 8 2 8 49 64 13 8 0 9 0 46 1

3 3 6 40 54 39 -7 1 7 76 66 6 -2 5 7 103 97 6 9 2 8 101 94 6 9 0 9 77 65 8

4 3 6 0 40 1 -6 1 7 264 259 4 -1 5 7 104 105 6 10 2 8 40 43 40 10 0 9 36 27 35

5 3 6 82 77 6 -5 1 7 0 42 1 0 5 7 63 51 10 11 2 8 0 18 1 11 0 9 0 15 1

6 3 6 64 66 9 -4 1 7 298 306 5 1 5 7 86 83 8 -11 3 8 35 33 34 -12 1 9 0 35 1

7 3 6 0 2 1 -3 1 7 419 422 5 2 5 7 107 100 6 -10 3 8 0 41 1 -11 1 9 95 78 6

8 3 6 84 76 7 -2 1 7 193 198 3 3 5 7 0 9 1 -9 3 8 62 48 10 -10 1 9 41 29 40

9 3 6 0 30 1 -1 1 7 120 117 3 4 5 7 63 65 10 -8 3 8 76 72 8 -9 1 9 0 22 1

10 3 6 37 23 36 0 1 7 263 265 4 5 5 7 67 53 10 -7 3 8 41 18 13 -8 1 9 160 159 4

11 3 6 0 32 1 1 1 7 82 75 4 6 5 7 58 48 12 -6 3 8 26 56 26 -7 1 9 65 76 8

-11 4 6 17 9 16 2 1 7 100 97 4 7 5 7 0 49 1 -5 3 8 46 63 12 -6 1 9 121 112 4

-10 4 6 74 58 9 3 1 7 65 66 6 8 5 7 46 45 23 -4 3 8 55 52 9 -5 1 9 108 115 4

-9 4 6 40 40 15 4 1 7 325 329 5 -6 6 7 51 42 16 -3 3 8 121 121 5 -4 1 9 259 252 4

-8 4 6 147 146 5 5 1 7 52 53 8 -5 6 7 43 65 26 -2 3 8 132 133 4 -3 1 9 480 489 6

-7 4 6 95 96 7 6 1 7 207 200 3 -4 6 7 0 14 1 -1 3 8 99 102 5 -2 1 9 276 290 4

-6 4 6 47 46 12 7 1 7 134 127 5 -3 6 7 57 51 13 0 3 8 100 90 5 -1 1 9 28 31 18

-5 4 6 34 41 33 8 1 7 83 85 7 -2 6 7 115 116 6 1 3 8 78 65 6 0 1 9 80 82 5

-4 4 6 236 229 4 9 1 7 46 54 46 -1 6 7 61 40 12 2 3 8 70 72 7 1 1 9 175 177 3

-3 4 6 142 147 5 10 1 7 62 63 11 0 6 7 0 6 1 3 3 8 80 76 6 2 1 9 229 233 3

-2 4 6 200 201 4 11 1 7 30 28 30 1 6 7 59 34 12 4 3 8 81 77 7 3 1 9 155 154 3

-1 4 6 96 101 6 12 1 7 19 46 19 2 6 7 86 84 9 5 3 8 333 339 5 4 1 9 0 46 1

0 4 6 46 63 46 -12 2 7 0 11 1 3 6 7 26 58 25 6 3 8 28 46 27 5 1 9 222 217 4

1 4 6 91 94 6 -11 2 7 92 91 7 4 6 7 26 33 26 7 3 8 194 195 5 6 1 9 112 113 5

2 4 6 89 95 7 -10 2 7 62 73 10 5 6 7 65 68 14 8 3 8 74 63 8 7 1 9 53 46 11

3 4 6 29 65 29 -9 2 7 183 184 4 -13 0 8 35 33 34 9 3 8 45 38 44 8 1 9 46 79 46

4 4 6 115 118 7 -8 2 7 117 106 5 -12 0 8 178 169 6 10 3 8 0 51 1 9 1 9 0 21 1

5 4 6 102 96 7 -7 2 7 59 61 8 -11 0 8 46 45 45 -10 4 8 85 45 8 10 1 9 57 47 12

6 4 6 114 109 6 -6 2 7 66 64 7 -10 0 8 82 81 7 -9 4 8 0 16 1 11 1 9 54 30 53

7 4 6 105 109 7 -5 2 7 210 211 3 -9 0 8 41 6 13 -8 4 8 126 128 6 -12 2 9 0 9 1

8 4 6 0 9 1 -4 2 7 135 134 3 -8 0 8 138 125 5 -7 4 8 105 115 6 -11 2 9 0 38 1

9 4 6 0 6 1 -3 2 7 342 347 5 -7 0 8 140 128 4 -6 4 8 32 34 32 -10 2 9 0 39 1

10 4 6 19 38 19 -2 2 7 115 119 4 -6 0 8 45 41 10 -5 4 8 88 84 7 -9 2 9 119 125 5

-9 5 6 41 8 19 -1 2 7 153 158 3 -5 0 8 112 102 4 -4 4 8 167 181 5 -8 2 9 77 76 7

-8 5 6 0 37 1 0 2 7 153 156 3 -4 0 8 108 107 4 -3 4 8 63 74 10 -7 2 9 122 130 5

-7 5 6 50 53 50 1 2 7 108 113 4 -3 0 8 272 267 4 -2 4 8 111 103 5 -6 2 9 80 64 5

-6 5 6 79 79 9 2 2 7 192 194 3 -2 0 8 109 103 4 -1 4 8 104 93 6 -5 2 9 0 27 1

-5 5 6 77 82 9 3 2 7 232 236 4 -1 0 8 271 263 5 0 4 8 80 75 7 -4 2 9 171 175 3

-4 5 6 153 159 5 4 2 7 93 95 5 0 0 8 0 0 1 1 4 8 101 90 7 -3 2 9 225 233 4

Observed and calculated structure factors for cs2-13f2 Page 4

h k l 10Fo 10Fc 10s h k l 10Fo 10Fc 10s h k l 10Fo 10Fc 10s h k l 10Fo 10Fc 10s h k l 10Fo 10Fc 10s

-2 2 9 114 120 4 -1 0 10 149 148 3 3 4 10 60 48 9 8 2 11 76 71 9 0 1 12 68 71 7

-1 2 9 190 188 3 0 0 10 126 123 4 4 4 10 28 52 28 9 2 11 37 27 36 1 1 12 83 72 6

0 2 9 152 146 3 1 0 10 166 162 3 5 4 10 60 42 10 10 2 11 90 79 9 2 1 12 0 7 1

1 2 9 125 129 4 2 0 10 117 116 4 6 4 10 95 89 7 -10 3 11 0 33 1 3 1 12 69 74 7

2 2 9 119 109 4 3 0 10 219 210 3 7 4 10 31 24 31 -9 3 11 63 71 10 4 1 12 69 55 8

3 2 9 152 151 4 4 0 10 0 18 1 8 4 10 0 24 1 -8 3 11 47 52 13 5 1 12 131 134 5

4 2 9 74 69 6 5 0 10 64 61 8 -8 5 10 50 55 50 -7 3 11 0 62 1 6 1 12 0 41 1

5 2 9 100 100 5 6 0 10 50 49 12 -7 5 10 34 41 34 -6 3 11 36 35 35 7 1 12 0 22 1

6 2 9 74 71 8 7 0 10 42 5 41 -6 5 10 47 26 47 -5 3 11 199 190 4 8 1 12 0 42 1

7 2 9 16 61 15 8 0 10 29 60 28 -5 5 10 46 69 46 -3 3 11 204 195 4 9 1 12 26 34 26

8 2 9 175 177 5 9 0 10 0 23 1 -4 5 10 0 32 1 -2 3 11 0 44 1 10 1 12 48 32 16

9 2 9 46 50 16 10 0 10 0 18 1 -3 5 10 43 32 16 0 3 11 0 41 1 -11 2 12 33 41 32

10 2 9 45 52 44 11 0 10 55 10 13 -2 5 10 99 96 6 1 3 11 90 48 6 -10 2 12 0 25 1

11 2 9 33 34 33 -12 1 10 26 61 26 -1 5 10 100 98 6 2 3 11 0 55 1 -9 2 12 0 32 1

-11 3 9 27 50 26 -11 1 10 0 36 1 0 5 10 0 19 1 3 3 11 100 107 6 -8 2 12 60 55 10

-10 3 9 161 85 6 -10 1 10 36 29 18 2 5 10 38 37 38 4 3 11 77 75 8 -7 2 12 94 90 6

-9 3 9 0 68 1 -9 1 10 103 102 6 3 5 10 30 31 30 5 3 11 89 88 7 -6 2 12 130 142 5

-8 3 9 0 79 1 -8 1 10 72 77 8 4 5 10 36 44 35 6 3 11 80 75 9 -5 2 12 144 139 5

-7 3 9 180 141 5 -7 1 10 88 82 6 5 5 10 0 8 1 7 3 11 17 44 17 -4 2 12 239 234 4

-6 3 9 137 130 5 -6 1 10 0 29 1 6 5 10 0 16 1 8 3 11 0 43 1 -3 2 12 99 99 5

-5 3 9 89 101 9 -5 1 10 234 238 3 -4 6 10 88 89 9 9 3 11 29 41 28 -2 2 12 179 182 4

-4 3 9 87 105 6 -4 1 10 209 209 4 -3 6 10 19 14 18 -9 4 11 0 33 1 -1 2 12 94 98 5

-3 3 9 83 84 6 -3 1 10 32 11 32 -2 6 10 49 49 48 -8 4 11 47 52 18 0 2 12 75 78 6

-2 3 9 89 78 5 -2 1 10 296 306 5 -1 6 10 0 10 1 -7 4 11 72 67 8 1 2 12 75 78 6

-1 3 9 19 28 19 -1 1 10 151 154 3 0 6 10 37 5 37 -6 4 11 72 70 8 2 2 12 89 81 6

0 3 9 73 76 7 0 1 10 312 310 5 1 6 10 42 27 41 -5 4 11 180 182 5 3 2 12 87 84 6

1 3 9 60 55 8 1 1 10 0 23 1 2 6 10 19 28 18 -4 4 11 0 43 1 4 2 12 97 109 7

2 3 9 82 75 6 2 1 10 71 84 6 3 6 10 27 51 27 -3 4 11 190 192 4 5 2 12 61 57 10

3 3 9 61 69 9 3 1 10 65 76 8 -12 0 11 0 12 1 -2 4 11 37 33 19 6 2 12 0 18 1

4 3 9 30 32 29 4 1 10 58 51 8 -11 0 11 67 57 10 -1 4 11 130 125 5 7 2 12 37 45 25

5 3 9 0 69 1 5 1 10 113 119 5 -10 0 11 46 30 45 0 4 11 0 23 1 8 2 12 51 41 51

6 3 9 68 73 9 6 1 10 42 33 42 -9 0 11 43 40 16 1 4 11 32 19 31 9 2 12 0 56 1

7 3 9 57 51 11 7 1 10 56 69 11 -8 0 11 81 80 7 2 4 11 28 41 27 -10 3 12 42 20 42

8 3 9 78 79 8 8 1 10 108 113 7 -7 0 11 0 8 1 3 4 11 0 41 1 -9 3 12 0 20 1

9 3 9 46 57 45 9 1 10 76 71 9 -6 0 11 45 60 13 4 4 11 61 42 9 -8 3 12 50 38 13

10 3 9 19 41 19 10 1 10 18 17 18 -5 0 11 76 68 6 5 4 11 67 57 10 -7 3 12 41 31 41

-10 4 9 33 33 32 11 1 10 47 8 47 -4 0 11 220 213 4 6 4 11 18 3 17 -6 3 12 73 61 7

-9 4 9 0 17 1 -12 2 10 34 27 34 -3 0 11 76 73 5 7 4 11 50 62 17 -5 3 12 228 235 4

-8 4 9 20 56 20 -11 2 10 0 44 1 -2 0 11 0 18 1 8 4 11 95 75 8 -4 3 12 161 163 5

-7 4 9 67 81 10 -10 2 10 0 83 1 -1 0 11 238 221 4 -7 5 11 46 45 45 -3 3 12 219 216 4

-6 4 9 79 76 7 -9 2 10 66 59 9 0 0 11 46 41 9 -6 5 11 53 31 13 -2 3 12 92 92 7

-5 4 9 68 49 8 -8 2 10 96 95 6 1 0 11 92 98 5 -5 5 11 38 45 24 -1 3 12 91 93 6

-4 4 9 126 134 5 -7 2 10 115 126 6 2 0 11 23 6 22 -4 5 11 49 34 49 0 3 12 0 30 1

-3 4 9 26 17 26 -6 2 10 147 147 4 3 0 11 51 39 9 -3 5 11 0 35 1 1 3 12 26 21 26

-2 4 9 88 87 6 -5 2 10 71 78 7 4 0 11 72 61 7 -2 5 11 64 43 10 2 3 12 79 87 7

-1 4 9 153 155 5 -4 2 10 152 152 4 5 0 11 174 166 4 -1 5 11 42 17 41 3 3 12 66 69 9

0 4 9 55 58 12 -3 2 10 26 39 26 6 0 11 75 78 9 0 5 11 100 100 7 4 3 12 139 146 5

1 4 9 88 95 7 -2 2 10 129 122 4 7 0 11 19 38 19 1 5 11 42 20 42 5 3 12 111 111 6

2 4 9 0 21 1 -1 2 10 68 60 6 8 0 11 34 12 34 2 5 11 69 59 9 6 3 12 75 72 8

3 4 9 67 76 10 0 2 10 92 85 5 9 0 11 0 31 1 3 5 11 0 26 1 7 3 12 106 98 7

4 4 9 125 140 6 1 2 10 76 76 6 10 0 11 50 20 49 4 5 11 102 94 7 8 3 12 19 27 19

5 4 9 80 81 8 2 2 10 84 91 6 -12 1 11 19 25 18 5 5 11 0 46 1 -9 4 12 0 24 1

6 4 9 0 35 1 3 2 10 69 65 7 -11 1 11 39 34 23 6 5 11 43 36 42 -8 4 12 0 47 1

7 4 9 51 55 50 4 2 10 79 81 6 -10 1 11 68 52 8 -3 6 11 66 71 13 -7 4 12 96 98 8

8 4 9 42 58 26 5 2 10 223 223 4 -9 1 11 54 58 12 -2 6 11 0 63 1 -6 4 12 51 74 51

9 4 9 62 59 12 6 2 10 179 179 4 -8 1 11 47 54 14 -1 6 11 42 33 42 -5 4 12 43 25 13

-8 5 9 43 46 18 7 2 10 0 44 1 -7 1 11 94 100 6 0 6 11 27 18 26 -4 4 12 28 52 28

-7 5 9 0 47 1 8 2 10 37 45 23 -6 1 11 185 180 4 1 6 11 50 59 50 -3 4 12 131 134 5

-6 5 9 100 103 7 9 2 10 107 85 7 -5 1 11 49 56 10 2 6 11 0 37 1 -2 4 12 88 87 7

-5 5 9 49 68 48 10 2 10 0 35 1 -4 1 11 0 47 1 -12 0 12 37 41 37 -1 4 12 39 23 39

-4 5 9 44 49 44 -11 3 10 0 42 1 -3 1 11 0 17 1 -11 0 12 41 39 23 0 4 12 94 100 6

-3 5 9 0 12 1 -10 3 10 76 61 9 -2 1 11 177 176 3 -10 0 12 73 67 9 1 4 12 66 55 9

-2 5 9 82 79 8 -8 3 10 70 63 7 -1 1 11 187 184 3 -9 0 12 65 56 9 2 4 12 94 86 6

-1 5 9 28 52 28 -7 3 10 122 125 5 0 1 11 93 100 4 -8 0 12 0 20 1 3 4 12 24 42 23

0 5 9 96 96 7 -6 3 10 143 150 5 1 1 11 0 58 1 -7 0 12 0 51 1 4 4 12 38 50 38

1 5 9 66 74 10 -5 3 10 84 88 7 2 1 11 123 118 4 -6 0 12 70 61 8 5 4 12 0 15 1

2 5 9 52 60 14 -4 3 10 82 78 6 3 1 11 94 88 5 -5 0 12 0 5 1 6 4 12 45 39 44

3 5 9 51 49 15 -3 3 10 146 141 4 4 1 11 28 41 28 -4 0 12 94 89 5 7 4 12 0 33 1

4 5 9 0 39 1 -2 3 10 14 27 14 5 1 11 43 33 14 -3 0 12 120 120 4 -7 5 12 67 62 12

5 5 9 36 49 35 -1 3 10 46 60 46 6 1 11 0 39 1 -2 0 12 0 16 1 -6 5 12 32 24 32

6 5 9 0 30 1 0 3 10 53 54 10 7 1 11 45 57 16 -1 0 12 144 141 4 -5 5 12 0 21 1

7 5 9 0 26 1 1 3 10 44 34 13 8 1 11 60 53 10 0 0 12 107 104 5 -4 5 12 25 45 25

-5 6 9 42 15 42 2 3 10 89 71 8 9 1 11 44 49 43 1 0 12 0 38 1 -3 5 12 0 37 1

-4 6 9 19 40 18 3 3 10 56 37 11 10 1 11 46 38 45 2 0 12 0 10 1 -2 5 12 65 51 10

-3 6 9 54 59 15 4 3 10 139 142 5 -11 2 11 32 46 32 3 0 12 28 19 28 -1 5 12 0 10 1

-2 6 9 47 51 18 5 3 10 0 30 1 -10 2 11 0 34 1 4 0 12 139 135 4 0 5 12 17 46 17

-1 6 9 0 17 1 6 3 10 37 62 37 -9 2 11 60 58 9 5 0 12 219 220 4 1 5 12 30 31 30

0 6 9 0 48 1 7 3 10 73 80 9 -8 2 11 46 57 14 6 0 12 67 63 9 2 5 12 67 74 12

1 6 9 0 26 1 8 3 10 118 128 7 -7 2 11 114 113 6 7 0 12 0 21 1 3 5 12 55 55 54

2 6 9 46 52 45 9 3 10 43 52 20 -6 2 11 154 147 4 8 0 12 30 12 29 4 5 12 0 58 1

3 6 9 35 24 35 -10 4 10 38 25 38 -5 2 11 249 257 4 9 0 12 0 10 1 5 5 12 58 45 14

4 6 9 0 23 1 -9 4 10 45 43 44 -4 2 11 226 229 3 10 0 12 0 19 1 -11 0 13 75 83 10

-12 0 10 43 22 21 -8 4 10 35 17 35 -3 2 11 88 85 5 -11 1 12 49 64 48 -10 0 13 0 26 1

-11 0 10 47 60 17 -7 4 10 57 36 9 -2 2 11 30 37 30 -10 1 12 60 58 10 -9 0 13 29 5 29

-10 0 10 114 108 6 -6 4 10 110 112 6 -1 2 11 85 84 5 -9 1 12 0 9 1 -8 0 13 65 50 9

-9 0 10 178 168 5 -5 4 10 128 129 5 0 2 11 199 197 3 -8 1 12 78 87 7 -7 0 13 8 31 7

-8 0 10 123 128 5 -4 4 10 101 92 6 1 2 11 59 61 7 -7 1 12 94 103 7 -6 0 13 62 70 9

-7 0 10 0 36 1 -3 4 10 31 43 30 2 2 11 88 87 5 -6 1 12 64 53 8 -5 0 13 123 126 5

-6 0 10 113 107 5 -2 4 10 122 126 5 3 2 11 92 88 5 -5 1 12 139 132 4 -4 0 13 79 87 7

-5 0 10 0 0 1 -1 4 10 26 27 26 4 2 11 75 87 8 -4 1 12 138 137 4 -3 0 13 120 122 5

-4 0 10 40 27 39 0 4 10 69 66 8 5 2 11 22 31 22 -3 1 12 77 67 6 -2 0 13 25 29 24

-3 0 10 56 41 7 1 4 10 42 53 16 6 2 11 168 168 5 -2 1 12 197 196 3 -1 0 13 0 9 1

-2 0 10 340 321 5 2 4 10 31 11 31 7 2 11 48 35 47 -1 1 12 258 261 4 0 0 13 42 39 11

Observed and calculated structure factors for cs2-13f2 Page 5

h k l 10Fo 10Fc 10s h k l 10Fo 10Fc 10s h k l 10Fo 10Fc 10s h k l 10Fo 10Fc 10s h k l 10Fo 10Fc 10s

1 0 13 111 107 4 3 5 13 16 28 16 5 4 14 51 41 16 3 4 15 41 38 20 -2 0 17 32 31 32

2 0 13 106 106 5 4 5 13 0 40 1 6 4 14 51 54 17 4 4 15 0 62 1 -1 0 17 82 78 8

3 0 13 81 89 8 -11 0 14 19 5 18 -5 5 14 72 52 10 5 4 15 45 36 19 0 0 17 159 152 4

4 0 13 119 120 6 -10 0 14 31 14 31 -4 5 14 32 31 32 -3 5 15 42 14 42 1 0 17 0 4 1

5 0 13 41 3 41 -9 0 14 46 28 16 -3 5 14 52 49 51 -2 5 15 0 3 1 2 0 17 32 27 32

6 0 13 0 35 1 -8 0 14 103 94 6 -2 5 14 54 64 17 -1 5 15 68 52 11 3 0 17 129 127 6

7 0 13 94 94 7 -7 0 14 131 137 5 -1 5 14 0 32 1 0 5 15 0 15 1 4 0 17 117 110 6

8 0 13 0 54 1 -6 0 14 36 65 25 0 5 14 0 20 1 1 5 15 0 29 1 5 0 17 0 41 1

9 0 13 0 8 1 -5 0 14 93 88 6 1 5 14 52 43 52 -10 0 16 0 21 1 6 0 17 42 14 41

-11 1 13 0 19 1 -4 0 14 127 124 5 2 5 14 48 47 16 -9 0 16 18 38 18 7 0 17 39 5 38

-10 1 13 48 69 47 -3 0 14 41 35 40 3 5 14 19 53 18 -8 0 16 50 40 50 -9 1 17 38 30 37

-9 1 13 17 57 17 -2 0 14 74 72 6 -10 0 15 112 105 8 -7 0 16 44 26 15 -8 1 17 18 18 18

-8 1 13 37 30 18 -1 0 14 49 47 10 -9 0 15 97 97 8 -6 0 16 41 12 40 -7 1 17 17 44 17

-7 1 13 114 109 5 0 0 14 94 97 6 -8 0 15 34 23 26 -5 0 16 32 88 32 -6 1 17 0 4 1

-6 1 13 111 114 5 1 0 14 48 38 10 -7 0 15 28 17 27 -4 0 16 0 30 1 -5 1 17 61 41 9

-5 1 13 75 79 8 2 0 14 33 30 20 -6 0 15 0 34 1 -3 0 16 38 40 38 -4 1 17 0 35 1

-4 1 13 49 32 10 3 0 14 125 121 5 -5 0 15 76 70 7 -2 0 16 0 3 1 -3 1 17 49 45 13

-3 1 13 37 43 15 4 0 14 52 42 11 -4 0 15 46 4 45 -1 0 16 121 115 5 -2 1 17 102 87 6

-2 1 13 112 113 5 5 0 14 58 53 11 -3 0 15 0 76 1 0 0 16 8 28 7 -1 1 17 0 49 1

-1 1 13 154 151 4 6 0 14 85 87 7 -2 0 15 76 79 8 1 0 16 42 8 41 0 1 17 62 60 10

0 1 13 91 93 6 7 0 14 0 52 1 -1 0 15 76 70 8 2 0 16 23 45 22 1 1 17 50 63 49

1 1 13 75 78 7 8 0 14 26 21 25 0 0 15 26 24 25 3 0 16 103 95 6 2 1 17 94 93 7

2 1 13 77 68 6 9 0 14 0 15 1 1 0 15 18 25 17 4 0 16 126 130 6 3 1 17 17 40 17

3 1 13 57 60 10 -11 1 14 59 37 12 2 0 15 38 3 37 5 0 16 49 28 13 4 1 17 102 109 7

4 1 13 156 147 5 -10 1 14 67 44 9 3 0 15 136 140 5 6 0 16 36 1 36 5 1 17 29 33 28

5 1 13 143 148 6 -9 1 14 91 81 6 4 0 15 32 33 32 7 0 16 0 12 1 6 1 17 55 51 15

6 1 13 100 96 6 -8 1 14 0 18 1 5 0 15 0 27 1 -10 1 16 58 41 13 -8 2 17 0 16 1

7 1 13 51 50 14 -7 1 14 96 102 7 6 0 15 31 34 31 -9 1 16 49 25 48 -7 2 17 26 20 25

8 1 13 0 26 1 -6 1 14 96 84 6 7 0 15 83 68 8 -8 1 16 31 35 30 -6 2 17 40 23 39

9 1 13 0 38 1 -5 1 14 84 83 7 8 0 15 0 27 1 -7 1 16 36 42 23 -5 2 17 0 52 1

-11 2 13 0 30 1 -4 1 14 121 114 5 -10 1 15 49 39 49 -6 1 16 44 45 44 -4 2 17 0 10 1

-10 2 13 50 20 14 -3 1 14 101 100 6 -9 1 15 40 9 20 -5 1 16 26 44 25 -3 2 17 0 36 1

-9 2 13 50 41 50 -2 1 14 93 96 6 -8 1 15 0 48 1 -4 1 16 101 105 7 -2 2 17 24 31 23

-8 2 13 77 63 7 -1 1 14 110 121 6 -7 1 15 0 63 1 -3 1 16 35 18 35 -1 2 17 97 89 6

-7 2 13 37 54 36 0 1 14 137 138 5 -6 1 15 75 84 7 -2 1 16 84 92 7 0 2 17 0 42 1

-6 2 13 137 134 5 1 1 14 179 177 4 -5 1 15 114 116 5 -1 1 16 72 77 9 1 2 17 0 43 1

-5 2 13 172 174 4 2 1 14 34 63 33 -4 1 15 105 96 5 0 1 16 105 102 6 2 2 17 88 80 7

-4 2 13 81 85 6 3 1 14 103 106 6 -3 1 15 126 137 5 1 1 16 121 113 5 3 2 17 38 32 20

-3 2 13 240 241 4 4 1 14 183 187 5 -2 1 15 106 108 6 2 1 16 68 61 8 4 2 17 36 31 36

-2 2 13 136 137 5 5 1 14 100 95 6 -1 1 15 148 147 5 3 1 16 41 9 40 5 2 17 0 42 1

-1 2 13 122 123 5 6 1 14 59 56 11 0 1 15 97 98 7 4 1 16 33 13 32 6 2 17 0 34 1

0 2 13 0 34 1 7 1 14 21 18 21 1 1 15 0 25 1 5 1 16 80 76 8 -7 3 17 19 18 19

1 2 13 137 133 5 8 1 14 40 28 21 2 1 15 97 94 7 6 1 16 0 49 1 -6 3 17 48 56 18

2 2 13 160 161 4 9 1 14 0 22 1 3 1 15 71 71 8 7 1 16 72 60 9 -5 3 17 0 45 1

3 2 13 104 101 6 -10 2 14 38 15 37 4 1 15 102 104 6 -9 2 16 0 11 1 -4 3 17 31 61 30

4 2 13 111 111 6 -9 2 14 61 56 10 5 1 15 0 11 1 -8 2 16 48 4 48 -3 3 17 69 52 8

5 2 13 74 75 8 -8 2 14 47 40 13 6 1 15 0 18 1 -7 2 16 69 76 9 -2 3 17 81 69 8

6 2 13 80 80 8 -7 2 14 116 124 6 7 1 15 0 31 1 -6 2 16 110 108 6 -1 3 17 14 21 14

7 2 13 60 70 12 -6 2 14 0 43 1 8 1 15 51 33 50 -5 2 16 93 85 6 0 3 17 0 24 1

8 2 13 60 49 13 -5 2 14 0 32 1 -10 2 15 0 10 1 -4 2 16 24 37 23 1 3 17 0 44 1

9 2 13 0 24 1 -4 2 14 102 113 6 -9 2 15 0 27 1 -3 2 16 0 51 1 2 3 17 48 37 47

-10 3 13 0 13 1 -3 2 14 115 118 5 -8 2 15 40 69 39 -2 2 16 0 35 1 3 3 17 72 74 10

-9 3 13 59 52 11 -2 2 14 115 119 6 -7 2 15 12 36 11 -1 2 16 185 193 4 4 3 17 0 24 1

-8 3 13 51 23 50 -1 2 14 181 188 4 -6 2 15 24 54 23 0 2 16 0 26 1 -4 4 17 0 34 1

-7 3 13 77 64 7 0 2 14 131 124 5 -5 2 15 51 53 12 1 2 16 73 80 10 -3 4 17 66 62 11

-6 3 13 71 69 9 1 2 14 114 115 5 -4 2 15 28 50 27 2 2 16 73 83 9 -2 4 17 0 26 1

-5 3 13 28 47 28 2 2 14 138 146 5 -3 2 15 54 62 11 3 2 16 22 25 22 -1 4 17 32 25 31

-4 3 13 154 162 5 3 2 14 136 133 5 -2 2 15 84 87 7 4 2 16 95 79 7 0 4 17 9 18 8

-3 3 13 27 67 27 4 2 14 74 71 8 -1 2 15 131 136 5 5 2 16 62 61 13 1 4 17 0 24 1

-2 3 13 152 153 5 5 2 14 94 88 7 0 2 15 67 53 8 6 2 16 0 24 1 2 4 17 73 69 10

-1 3 13 0 23 1 6 2 14 0 29 1 1 2 15 106 102 6 7 2 16 19 41 19 -8 0 18 26 19 26

0 3 13 35 7 34 7 2 14 55 63 54 2 2 15 124 128 6 -8 3 16 53 54 14 -7 0 18 0 24 1

1 3 13 35 28 35 8 2 14 77 52 9 3 2 15 37 34 37 -7 3 16 127 118 6 -6 0 18 59 68 13

2 3 13 0 20 1 -9 3 14 41 31 22 4 2 15 100 99 7 -6 3 16 48 57 17 -5 0 18 0 13 1

3 3 13 171 173 5 -8 3 14 98 91 7 5 2 15 81 76 8 -5 3 16 85 84 8 -4 0 18 68 58 10

5 3 13 46 61 45 -7 3 14 72 69 8 6 2 15 85 83 8 -4 3 16 92 80 7 -3 0 18 24 36 23

6 3 13 44 50 44 -6 3 14 61 80 11 7 2 15 42 25 42 -3 3 16 0 45 1 -2 0 18 24 23 23

7 3 13 0 14 1 -5 3 14 135 132 5 -9 3 15 36 41 36 -2 3 16 86 68 7 -1 0 18 44 46 16

8 3 13 0 31 1 -4 3 14 60 63 10 -8 3 15 19 32 18 -1 3 16 24 31 24 0 0 18 45 19 44

-8 4 13 0 37 1 -3 3 14 79 72 8 -7 3 15 88 86 8 0 3 16 50 70 15 1 0 18 17 40 17

-7 4 13 0 48 1 -2 3 14 59 72 12 -6 3 15 25 30 24 1 3 16 30 29 29 2 0 18 0 8 1

-6 4 13 40 32 16 -1 3 14 98 97 6 -5 3 15 48 58 14 2 3 16 57 59 12 3 0 18 95 94 7

-5 4 13 75 79 9 0 3 14 36 11 36 -4 3 15 114 105 5 3 3 16 0 42 1 4 0 18 0 20 1

-4 4 13 137 135 5 1 3 14 0 87 1 -3 3 15 86 82 7 4 3 16 71 34 9 5 0 18 0 10 1

-3 4 13 69 69 10 2 3 14 98 102 6 -2 3 15 124 122 6 5 3 16 42 53 41 6 0 18 33 1 33

-2 4 13 64 65 9 3 3 14 69 78 10 -1 3 15 120 124 6 -6 4 16 53 40 15 -8 1 18 57 37 12

-1 4 13 40 75 40 4 3 14 89 88 8 0 3 15 79 72 8 -5 4 16 18 33 18 -7 1 18 0 60 1

0 4 13 77 81 7 5 3 14 61 57 10 1 3 15 0 32 1 -4 4 16 74 73 9 -6 1 18 0 56 1

1 4 13 49 48 12 6 3 14 41 17 41 2 3 15 79 87 9 -3 4 16 47 51 47 -5 1 18 59 50 11

2 4 13 45 71 44 7 3 14 27 18 27 3 3 15 50 56 49 -2 4 16 0 29 1 -4 1 18 70 66 9

3 4 13 39 84 38 -8 4 14 27 37 26 4 3 15 77 78 9 -1 4 16 51 45 50 -3 1 18 66 72 10

4 4 13 130 120 6 -7 4 14 19 40 18 5 3 15 26 38 25 0 4 16 44 20 43 -2 1 18 0 7 1

5 4 13 51 65 51 -6 4 14 0 25 1 6 3 15 0 11 1 1 4 16 41 53 40 -1 1 18 74 66 8

6 4 13 42 15 41 -5 4 14 30 39 30 -7 4 15 0 23 1 2 4 16 32 31 31 0 1 18 147 141 5

-6 5 13 19 31 18 -4 4 14 39 53 38 -6 4 15 0 43 1 3 4 16 42 46 23 1 1 18 72 57 9

-5 5 13 41 24 16 -3 4 14 35 53 31 -5 4 15 83 86 9 4 4 16 0 48 1 2 1 18 128 120 6

-4 5 13 0 22 1 -2 4 14 48 63 47 -4 4 15 43 51 43 -9 0 17 63 30 11 3 1 18 36 67 35

-3 5 13 0 27 1 -1 4 14 0 46 1 -3 4 15 118 120 6 -8 0 17 0 19 1 4 1 18 48 65 47

-2 5 13 0 26 1 0 4 14 17 47 17 -2 4 15 57 43 10 -7 0 17 0 3 1 5 1 18 59 65 58

-1 5 13 0 21 1 1 4 14 30 86 29 -1 4 15 43 34 42 -6 0 17 0 47 1 -7 2 18 115 106 7

0 5 13 31 24 30 2 4 14 0 21 1 0 4 15 0 13 1 -5 0 17 75 77 8 -6 2 18 32 70 31

1 5 13 72 52 9 3 4 14 95 95 7 1 4 15 54 68 13 -4 0 17 107 108 6 -5 2 18 40 52 40

2 5 13 26 19 25 4 4 14 75 82 10 2 4 15 56 61 12 -3 0 17 90 89 7 -4 2 18 0 42 1

Observed and calculated structure factors for cs2-13f2 Page 6

h k l 10Fo 10Fc 10s h k l 10Fo 10Fc 10s h k l 10Fo 10Fc 10s h k l 10Fo 10Fc 10s h k l 10Fo 10Fc 10s

-3 2 18 65 53 8 -6 0 19 0 68 1 2 1 19 0 42 1 -4 0 20 45 16 44 -2 2 20 37 32 28

-2 2 18 0 33 1 -5 0 19 147 148 6 3 1 19 95 91 8 -3 0 20 34 13 33 -1 2 20 42 50 41

-1 2 18 55 59 12 -4 0 19 0 27 1 4 1 19 0 17 1 -2 0 20 77 76 9 0 2 20 81 85 10

0 2 18 106 114 7 -3 0 19 0 11 1 -6 2 19 0 30 1 -1 0 20 59 73 14 1 2 20 27 46 26

1 2 18 25 26 25 -2 0 19 99 91 7 -5 2 19 45 33 45 0 0 20 0 26 1 2 2 20 0 23 1

2 2 18 58 51 12 -1 0 19 0 13 1 -4 2 19 26 49 25 1 0 20 0 15 1 -4 0 21 33 2 32

3 2 18 0 28 1 0 0 19 156 151 6 -3 2 19 18 24 18 2 0 20 37 59 37 -3 0 21 0 7 1

4 2 18 46 27 16 1 0 19 95 88 7 -2 2 19 0 55 1 3 0 20 0 38 1 -2 0 21 46 39 17

5 2 18 51 56 17 2 0 19 201 195 5 -1 2 19 80 72 8 -6 1 20 42 6 42 -1 0 21 19 14 18

-6 3 18 88 88 8 3 0 19 84 86 9 0 2 19 67 61 9 -5 1 20 34 31 33 0 0 21 0 13 1

-5 3 18 0 21 1 4 0 19 0 7 1 1 2 19 26 62 25 -4 1 20 18 20 18 1 0 21 77 67 11

-4 3 18 37 39 36 5 0 19 0 14 1 2 2 19 48 37 16 -3 1 20 0 44 1 -4 1 21 0 20 1

-3 3 18 18 15 18 -7 1 19 0 37 1 3 2 19 31 24 31 -2 1 20 18 23 18 -3 1 21 0 29 1

-2 3 18 13 8 12 -6 1 19 46 39 17 -4 3 19 19 25 18 -1 1 20 0 43 1 -2 1 21 0 36 1

-1 3 18 0 22 1 -5 1 19 44 50 44 -3 3 19 0 12 1 0 1 20 0 22 1 -1 1 21 0 41 1

0 3 18 56 16 12 -4 1 19 31 38 30 -2 3 19 34 24 33 1 1 20 110 111 8 0 1 21 115 108 8

1 3 18 0 30 1 -3 1 19 62 73 12 -1 3 19 46 14 45 2 1 20 0 25 1 1 1 21 43 53 42

2 3 18 0 44 1 -2 1 19 0 31 1 0 3 19 44 56 21 3 1 20 95 86 8

3 3 18 19 30 18 -1 1 19 49 70 49 1 3 19 0 11 1 -5 2 20 59 46 13

-1 4 18 82 76 9 0 1 19 110 108 7 -6 0 20 38 19 37 -4 2 20 42 36 19

-7 0 19 19 40 18 1 1 19 35 23 25 -5 0 20 0 10 1 -3 2 20 73 65 9
