# Supplementary material for: Electro-organic reactions. Part 51.† Reactivity and stereochemical pathways for cathodically generated radical-anions of α,β-unsaturated ketones in aqueous media
Source: Royal Society of Chemistry journal article supplement (doi:10.1039/a908657i), 2000-01-01
Supplement: a908657i2.doc [file a908657i2.doc]

**Supplementary Data**

**Electro-organic reactions. Part 51. Reactivity and stereochemical pathways for cathodically generated radical-anions of -unsaturated ketones in aqueous media**

# James H. P. Utley,* Carmen Z. Smith and Majid Motevalli

# *Department of Chemistry, Queen Mary and Westfield College (University of London), Mile End Road, London, UK E1 4NS*

**Table S1** Crystal data and structure refinement for cs2-13f1.

# Identification code cs2-13f1

Empirical formula C33 H31 Cl3 O4

Formula weight 597.93

Temperature 120(2) K

Wavelength 0.71073 Å

Crystal system Monoclinic

Space group *P*21/*n*

Unit cell dimensions a = 21.396(8) Å = 90°.

b = 5.699(4) Å = 94.45(5)°.

c = 24.090(9) Å = 90°.

Volume 2929(3) Å3

Z 4

Density (calculated) 1.356 Mg/m3

Absorption coefficient 0.350 mm-1

F(000) 1248

Crystal size 0.2 x 0.1 x 0.05 mm3

Theta range for data collection 1.33 to 23.03°.

Index ranges -23<=h<=23, 0<=k<=6, 0<=l<=26

Reflections collected 4168

Independent reflections 4056 [R(int) = 0.1067]

Completeness to theta = 23.03° 98.8 %

Refinement method Full-matrix least-squares on F2

Data / restraints / parameters 4056 / 97 / 317

Goodness-of-fit on F2 0.915

Final R indices [I>2sigma(I)] R1 = 0.1627, wR2 = 0.4387

R indices (all data) R1 = 0.4081, wR2 = 0.5726

Largest diff. peak and hole 0.154 and -0.147 e.Å-3

**Table S2** Atomic coordinates ( x 104) and equivalent isotropic displacement parameters

(Å2x 103) for cs2-13f1. U(eq) is defined as one third of the trace of the orthogonalized Uij tensor.

______________________________________________________________________________

x y z U(eq)

______________________________________________________________________________

C(1) 7357(7) 1750(40) 9604(7) 63(5)

C(2) 7621(5) 1840(20) 9036(4) 64(5)

C(3) 8015(5) 82(17) 8869(4) 70(6)

C(4) 8285(5) 267(18) 8364(5) 68(5)

C(5) 8161(5) 2210(20) 8026(3) 64(5)

C(6) 7767(5) 3977(17) 8193(4) 68(6)

C(7) 7497(5) 3792(18) 8697(4) 61(5)

C(8) 8448(11) 4320(40) 7215(8) 88(7)

C(9) 7668(8) 3650(30) 10012(7) 66(5)

C(10) 7422(5) 3570(20) 10592(3) 59(5)

C(11) 7058(5) 5398(16) 10771(4) 65(5)

C(12) 6835(5) 5319(17) 11297(4) 65(5)

C(13) 6975(5) 3410(20) 11644(3) 65(5)

C(14) 7339(5) 1581(18) 11465(4) 70(5)

C(15) 7563(5) 1660(18) 10938(4) 71(6)

C(16) 6862(11) 1640(40) 12532(9) 92(7)

C(17) 6647(7) 2030(30) 9572(8) 64(5)

C(18) 6294(8) -190(30) 9353(7) 63(5)

C(19) 5599(4) -70(20) 9264(5) 66(5)

C(20) 5304(6) -2030(19) 9020(5) 80(6)

C(21) 4653(6) -2140(20) 8960(5) 91(7)

C(22) 4298(4) -300(30) 9144(6) 85(6)

C(23) 4593(5) 1660(20) 9388(5) 82(6)

C(24) 5244(5) 1772(19) 9448(5) 72(6)

C(25) 8392(8) 3370(40) 10045(8) 68(5)

C(26) 8718(8) 5410(40) 10343(6) 61(5)

C(27) 9388(4) 4960(20) 10589(5) 67(5)

C(28) 9718(5) 2935(19) 10480(5) 70(6)

C(29) 10331(5) 2655(19) 10704(5) 74(6)

C(30) 10616(4) 4400(20) 11038(5) 82(6)

C(31) 10286(5) 6430(20) 11146(5) 81(6)

C(32) 9672(5) 6713(19) 10922(5) 75(6)

O(1) 8480(6) 2240(30) 7551(5) 82(5)

O(2) 6723(6) 3560(30) 12150(5) 75(5)

O(3) 6587(5) -1970(20) 9277(6) 81(5)

O(4) 8481(6) 7290(20) 10389(7) 90(6)

C(33A) 9528(18) 960(80) 12523(16) 72(11)

Cl(1A) 8999(9) 1690(40) 11858(8) 114(8)

Cl(2A) 10300(8) 100(30) 12441(6) 100(6)

Cl(3A) 9556(6) 3370(30) 12950(5) 94(5)

C(33B) 9630(30) 2170(150) 12280(30) 160(30)

Cl(1B) 9205(8) 1760(30) 11840(6) 93(6)

Cl(2B) 10096(16) -500(70) 12427(14) 221(17)

Cl(3B) 9708(10) 4340(50) 12712(9) 166(8)

_____________________________________________________________________________

**Table S3** Bond lengths [Å] and angles [°] for cs2-13f1.

_____________________________________________________

C(1)-C(2) 1.522(18)

C(1)-C(17) 1.52(2)

C(1)-C(9) 1.58(3)

C(1)-H(1) 0.9800

C(2)-C(3) 1.3900

C(2)-C(7) 1.3900

C(3)-C(4) 1.3900

C(3)-H(3) 0.9300

C(4)-C(5) 1.3900

C(4)-H(4) 0.9300

C(5)-O(1) 1.377(14)

C(5)-C(6) 1.3900

C(6)-C(7) 1.3900

C(6)-H(6) 0.9300

C(7)-H(7) 0.9300

C(8)-O(1) 1.43(2)

C(8)-H(8A) 0.9600

C(8)-H(8B) 0.9600

C(8)-H(8C) 0.9600

C(9)-C(10) 1.530(19)

C(9)-C(25) 1.55(2)

C(9)-H(9) 0.9800

C(10)-C(11) 1.3900

C(10)-C(15) 1.3900

C(11)-C(12) 1.3900

C(11)-H(11) 0.9300

C(12)-C(13) 1.3900

C(12)-H(12) 0.9300

C(13)-O(2) 1.375(14)

C(13)-C(14) 1.3900

C(14)-C(15) 1.3900

C(14)-H(14) 0.9300

C(15)-H(15) 0.9300

C(16)-O(2) 1.45(2)

C(16)-H(16A) 0.9600

C(16)-H(16B) 0.9600

C(16)-H(16C) 0.9600

C(17)-C(18) 1.54(2)

C(17)-H(17A) 0.9700

C(17)-H(17B) 0.9700

C(18)-O(3) 1.21(2)

C(18)-C(19) 1.486(19)

C(19)-C(20) 1.3900

C(19)-C(24) 1.3900

C(20)-C(21) 1.3900

C(20)-H(20) 0.9300

C(21)-C(22) 1.3900

C(21)-H(21) 0.9300

C(22)-C(23) 1.3900

C(22)-H(22) 0.9300

C(23)-C(24) 1.3900

C(23)-H(23) 0.9300

C(24)-H(24) 0.9300

C(25)-C(26) 1.51(3)

C(25)-H(25A) 0.9700

C(25)-H(25B) 0.9700

C(26)-O(4) 1.20(2)

C(26)-C(27) 1.529(19)

C(27)-C(28) 1.3900

C(27)-C(32) 1.3900

C(28)-C(29) 1.3900

C(28)-H(28) 0.9300

C(29)-C(30) 1.3900

C(29)-H(29) 0.9300

C(30)-C(31) 1.3900

C(30)-H(30) 0.9300

C(31)-C(32) 1.3900

C(31)-H(31) 0.9300

C(32)-H(32) 0.9300

C(33A)-Cl(3A) 1.71(4)

C(33A)-Cl(2A) 1.75(4)

C(33A)-Cl(1A) 1.93(4)

C(33B)-Cl(1B) 1.36(7)

C(33B)-Cl(3B) 1.62(7)

C(33B)-Cl(2B) 1.84(8)

C(2)-C(1)-C(17) 112.9(13)

C(2)-C(1)-C(9) 111.7(14)

C(17)-C(1)-C(9) 109.4(15)

C(2)-C(1)-H(1) 107.5

C(17)-C(1)-H(1) 107.5

C(9)-C(1)-H(1) 107.5

C(3)-C(2)-C(7) 120.0

C(3)-C(2)-C(1) 120.7(10)

C(7)-C(2)-C(1) 119.2(10)

C(2)-C(3)-C(4) 120.0

C(2)-C(3)-H(3) 120.0

C(4)-C(3)-H(3) 120.0

C(5)-C(4)-C(3) 120.0

C(5)-C(4)-H(4) 120.0

C(3)-C(4)-H(4) 120.0

O(1)-C(5)-C(6) 125.7(10)

O(1)-C(5)-C(4) 114.3(10)

C(6)-C(5)-C(4) 120.0

C(5)-C(6)-C(7) 120.0

C(5)-C(6)-H(6) 120.0

C(7)-C(6)-H(6) 120.0

C(6)-C(7)-C(2) 120.0

C(6)-C(7)-H(7) 120.0

C(2)-C(7)-H(7) 120.0

O(1)-C(8)-H(8A) 109.5

O(1)-C(8)-H(8B) 109.5

H(8A)-C(8)-H(8B) 109.5

O(1)-C(8)-H(8C) 109.5

H(8A)-C(8)-H(8C) 109.5

H(8B)-C(8)-H(8C) 109.5

C(10)-C(9)-C(25) 111.3(13)

C(10)-C(9)-C(1) 112.9(14)

C(25)-C(9)-C(1) 109.3(14)

C(10)-C(9)-H(9) 107.7

C(25)-C(9)-H(9) 107.7

C(1)-C(9)-H(9) 107.7

C(11)-C(10)-C(15) 120.0

C(11)-C(10)-C(9) 120.0(10)

C(15)-C(10)-C(9) 120.0(10)

C(10)-C(11)-C(12) 120.0

C(10)-C(11)-H(11) 120.0

C(12)-C(11)-H(11) 120.0

C(13)-C(12)-C(11) 120.0

C(13)-C(12)-H(12) 120.0

C(11)-C(12)-H(12) 120.0

O(2)-C(13)-C(12) 113.7(10)

O(2)-C(13)-C(14) 126.3(10)

C(12)-C(13)-C(14) 120.0

C(13)-C(14)-C(15) 120.0

C(13)-C(14)-H(14) 120.0

C(15)-C(14)-H(14) 120.0

C(14)-C(15)-C(10) 120.0

C(14)-C(15)-H(15) 120.0

C(10)-C(15)-H(15) 120.0

O(2)-C(16)-H(16A) 109.5

O(2)-C(16)-H(16B) 109.5

H(16A)-C(16)-H(16B) 109.5

O(2)-C(16)-H(16C) 109.5

H(16A)-C(16)-H(16C) 109.5

H(16B)-C(16)-H(16C) 109.5

C(1)-C(17)-C(18) 113.3(15)

C(1)-C(17)-H(17A) 108.9

C(18)-C(17)-H(17A) 108.9

C(1)-C(17)-H(17B) 108.9

C(18)-C(17)-H(17B) 108.9

H(17A)-C(17)-H(17B) 107.7

O(3)-C(18)-C(19) 122.5(16)

O(3)-C(18)-C(17) 119.3(16)

C(19)-C(18)-C(17) 118.2(14)

C(20)-C(19)-C(24) 120.0

C(20)-C(19)-C(18) 116.3(10)

C(24)-C(19)-C(18) 123.5(11)

C(19)-C(20)-C(21) 120.0

C(19)-C(20)-H(20) 120.0

C(21)-C(20)-H(20) 120.0

C(22)-C(21)-C(20) 120.0

C(22)-C(21)-H(21) 120.0

C(20)-C(21)-H(21) 120.0

C(21)-C(22)-C(23) 120.0

C(21)-C(22)-H(22) 120.0

C(23)-C(22)-H(22) 120.0

C(24)-C(23)-C(22) 120.0

C(24)-C(23)-H(23) 120.0

C(22)-C(23)-H(23) 120.0

C(23)-C(24)-C(19) 120.0

C(23)-C(24)-H(24) 120.0

C(19)-C(24)-H(24) 120.0

C(26)-C(25)-C(9) 111.4(16)

C(26)-C(25)-H(25A) 109.3

C(9)-C(25)-H(25A) 109.3

C(26)-C(25)-H(25B) 109.3

C(9)-C(25)-H(25B) 109.3

H(25A)-C(25)-H(25B) 108.0

O(4)-C(26)-C(25) 123.5(17)

O(4)-C(26)-C(27) 120.4(17)

C(25)-C(26)-C(27) 116.1(16)

C(28)-C(27)-C(32) 120.0

C(28)-C(27)-C(26) 122.7(10)

C(32)-C(27)-C(26) 117.3(10)

C(27)-C(28)-C(29) 120.0

C(27)-C(28)-H(28) 120.0

C(29)-C(28)-H(28) 120.0

C(30)-C(29)-C(28) 120.0

C(30)-C(29)-H(29) 120.0

C(28)-C(29)-H(29) 120.0

C(29)-C(30)-C(31) 120.0

C(29)-C(30)-H(30) 120.0

C(31)-C(30)-H(30) 120.0

C(32)-C(31)-C(30) 120.0

C(32)-C(31)-H(31) 120.0

C(30)-C(31)-H(31) 120.0

C(31)-C(32)-C(27) 120.0

C(31)-C(32)-H(32) 120.0

C(27)-C(32)-H(32) 120.0

C(5)-O(1)-C(8) 118.1(14)

C(13)-O(2)-C(16) 116.1(14)

Cl(3A)-C(33A)-Cl(2A) 108(2)

Cl(3A)-C(33A)-Cl(1A) 108(2)

Cl(2A)-C(33A)-Cl(1A) 118(2)

Cl(1B)-C(33B)-Cl(3B) 132(6)

Cl(1B)-C(33B)-Cl(2B) 109(5)

Cl(3B)-C(33B)-Cl(2B) 118(4)

_____________________________________________________________

**Table S4** Anisotropic displacement parameters (Å2x 103) for cs2-13f1. The anisotropic

displacement factor exponent takes the form: -22[ h2a*2U11 + ... + 2 h k a* b* U12 ].

______________________________________________________________________________

U11 U22 U33 U23 U13 U12

______________________________________________________________________________

C(1) 61(8) 60(10) 68(8) 7(7) -1(6) 1(7)

C(2) 60(10) 59(9) 71(8) -2(7) 1(7) -11(8)

C(3) 59(11) 83(12) 67(9) 11(9) -4(7) 11(9)

C(4) 75(12) 58(10) 71(9) -11(7) 0(7) 1(9)

C(5) 70(11) 72(11) 48(8) -11(7) -1(6) 6(8)

C(6) 67(11) 63(11) 73(10) 0(8) 5(7) -1(8)

C(7) 58(10) 60(10) 63(9) -10(7) 2(7) -4(8)

C(8) 110(16) 93(15) 62(11) 4(10) 7(10) 4(14)

C(9) 67(8) 59(11) 71(8) 0(7) 3(7) 0(8)

C(10) 53(9) 52(9) 72(8) -1(6) 0(6) -3(7)

C(11) 69(11) 51(9) 73(9) -9(8) 3(7) -8(8)

C(12) 73(11) 51(9) 71(9) -8(7) 5(7) -16(8)

C(13) 67(11) 63(10) 66(8) -5(7) 3(7) -11(8)

C(14) 69(11) 73(11) 68(9) 3(9) 2(7) 3(9)

C(15) 74(12) 66(11) 72(9) 7(8) 4(8) 7(9)

C(16) 111(16) 89(15) 78(11) 22(11) 9(11) -2(14)

C(17) 59(8) 46(8) 86(12) 19(9) 7(7) 0(7)

C(18) 60(7) 57(9) 73(11) -5(9) 20(8) -2(6)

C(19) 63(7) 60(10) 73(11) 2(9) 3(8) 1(6)

C(20) 84(9) 75(11) 80(12) 8(10) -4(9) -13(9)

C(21) 85(10) 92(14) 93(14) -9(12) 1(11) -26(10)

C(22) 90(12) 78(12) 85(14) 27(11) 3(10) -13(8)

C(23) 66(8) 96(14) 82(12) -5(12) -1(9) 8(9)

C(24) 66(8) 75(11) 74(11) 10(10) 2(8) 15(8)

C(25) 63(8) 58(10) 83(11) -7(9) 7(7) -2(8)

C(26) 66(8) 74(10) 46(9) -13(9) 10(6) 4(7)

C(27) 65(9) 66(10) 70(11) 10(9) 3(7) -8(6)

C(28) 66(9) 67(10) 75(11) 5(9) -7(8) -4(8)

C(29) 65(9) 71(12) 83(12) 7(9) -4(8) -6(8)

C(30) 74(12) 93(14) 77(12) 0(11) -16(9) -1(9)

C(31) 76(11) 79(12) 87(13) -10(11) 1(9) -21(9)

C(32) 71(9) 90(13) 65(11) -11(10) 8(7) -3(9)

O(1) 94(9) 81(10) 72(8) 1(7) 17(6) 8(8)

O(2) 84(9) 79(9) 63(7) -2(6) 9(5) -3(7)

O(3) 64(8) 54(7) 126(11) -9(8) 5(7) 3(6)

O(4) 87(10) 59(8) 120(12) -15(8) -7(8) 3(6)

______________________________________________________________________________

**Table S5** Hydrogen coordinates ( x 104) and isotropic displacement parameters (Å2x 103) for cs2-13f1.

______________________________________________________________________________

x y z U(eq)

______________________________________________________________________________

H(1) 7459 207 9765 76

H(3) 8098 -1221 9095 110(40)

H(4) 8548 -912 8253 110(40)

H(6) 7684 5280 7966 110(40)

H(7) 7234 4972 8809 110(40)

H(8A) 8030 4498 7044 133

H(8B) 8737 4194 6932 133

H(8C) 8553 5660 7445 133

H(9) 7566 5203 9853 79

H(11) 6965 6674 10539 70(20)

H(12) 6592 6543 11417 70(20)

H(14) 7433 305 11697 70(20)

H(15) 7806 436 10818 70(20)

H(16A) 6719 198 12361 139

H(16B) 6654 1895 12866 139

H(16C) 7307 1560 12622 139

H(17A) 6528 3337 9330 77

H(17B) 6520 2391 9940 77

H(20) 5542 -3264 8896 160(50)

H(21) 4456 -3454 8796 160(50)

H(22) 3863 -375 9104 160(50)

H(23) 4355 2893 9511 160(50)

H(24) 5441 3082 9611 160(50)

H(25A) 8509 1926 10240 82

H(25B) 8529 3256 9671 82

H(28) 9527 1765 10257 110(30)

H(29) 10552 1298 10631 110(30)

H(30) 11026 4217 11188 110(30)

H(31) 10476 7604 11369 110(30)

H(32) 9452 8071 10995 110(30)

______________________________________________________________________________


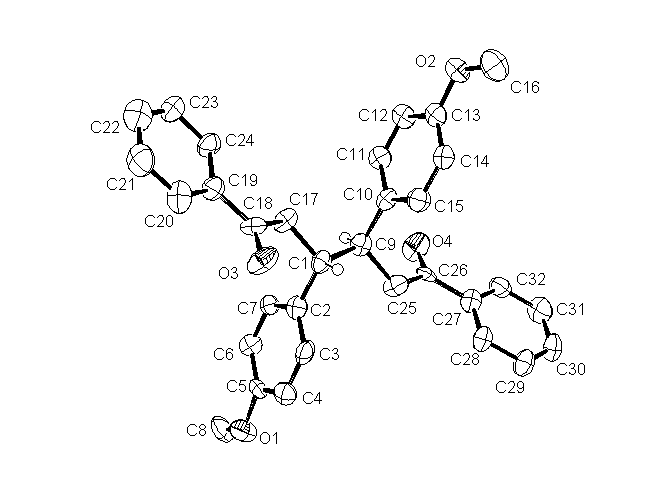


**Fig. S1** Structure and atomic numbering of cs2-13f1.

**Table S6** Crystal data and structure refinement for cs2-13f2.

Identification code cs2-13f2

Empirical formula C32 H30 O4

Formula weight 478.56

Temperature 120(2) K

Wavelength 0.71073 Å

Crystal system Monoclinic

Space group *P*21

Unit cell dimensions a = 11.431(5) Å  = 90°.

b = 6.0470(10) Å  = 96.69(7)°.

c = 18.286(6) Å  = 90°.

Volume 1255.4(7) Å3

Z 2

Density (calculated) 1.266 Mg/m3

Absorption coefficient 0.082 mm-1

F(000) 508

Crystal size 0.30 x 0.20 x 0.10 mm3

Theta range for data collection 1.79 to 24.97°

Index ranges -13<=h<=13, 0<=k<=7, 0<=l<=21

Reflections collected 2505

Independent reflections 2426 [R(int) = 0.0556]

Completeness to theta = 24.97° 99.6 %

Max. and min. transmission 0.9918 and 0.9757

Refinement method Full-matrix least-squares on F2

Data / restraints / parameters 2426 / 1 / 350

Goodness-of-fit on F2 0.876

Final R indices [I>2sigma(I)] R1 = 0.0478, wR2 = 0.1083

R indices (all data) R1 = 0.1431, wR2 = 0.1443

Absolute structure parameter 0(3)

Extinction coefficient 0.008(2)

Largest diff. peak and hole 0.212 and -0.237 e.Å-3

**Table S7** Atomic coordinates ( x 104) and equivalent isotropic displacement parameters

(Å2x 103) for cs2-13f2. U(eq) is defined as one third of the trace of the orthogonalized Uij tensor.

______________________________________________________________________________

x y z U(eq)

______________________________________________________________________________

O(1) 2977(4) 3491(8) 6486(3) 43(1)

O(2) -1610(4) 6461(10) 9626(2) 54(1)

O(3) -3297(3) 8741(8) 5037(2) 45(1)

O(4) 2192(4) 1922(8) 7899(3) 46(1)

C(1) 2530(5) 5569(11) 7515(3) 30(2)

C(2) 3086(5) 5699(11) 6771(3) 34(2)

C(3) 2240(5) 7285(12) 6302(3) 40(2)

C(4) 1173(5) 7728(12) 6719(3) 35(2)

C(5) 1208(5) 5786(12) 7270(3) 33(2)

C(7) 449(5) 6053(11) 7889(3) 34(2)

C(8) 568(6) 7839(12) 8366(3) 45(2)

C(9) -107(5) 8064(12) 8947(3) 42(2)

C(10) -929(5) 6467(13) 9056(3) 38(2)

C(11) -1066(6) 4700(14) 8583(4) 47(2)

C(12) -401(5) 4505(13) 8009(4) 42(2)

C(13) -1574(6) 8325(15) 10086(4) 60(2)

C(14) 6(5) 8027(11) 6247(3) 31(2)

C(15) -617(6) 9933(12) 6303(3) 42(2)

C(16) -1725(6) 10278(13) 5916(3) 44(2)

C(17) -2197(5) 8623(13) 5451(3) 39(2)

C(18) -1564(6) 6715(13) 5365(4) 46(2)

C(19) -462(6) 6432(13) 5759(3) 44(2)

C(20) -4062(6) 10475(15) 5206(4) 59(2)

C(21) 4367(5) 6457(12) 6878(3) 35(2)

C(22) 4657(5) 8572(12) 7117(3) 37(2)

C(23) 5823(6) 9164(13) 7306(4) 49(2)

C(24) 6714(7) 7699(17) 7226(4) 63(3)

C(25) 6445(7) 5634(16) 6966(4) 57(2)

C(26) 5279(6) 4991(13) 6795(3) 43(2)

C(27) 2860(5) 3518(12) 7960(3) 33(2)

C(29) 4247(6) 1382(12) 8837(3) 40(2)

C(30) 5298(6) 1175(13) 9296(4) 50(2)

C(31) 6067(6) 2922(13) 9388(4) 47(2)

C(32) 5799(6) 4880(13) 9044(4) 42(2)

C(33) 4755(5) 5123(11) 8593(3) 34(2)

C(28) 3973(5) 3356(11) 8478(3) 32(2)

______________________________________________________________________________

**Table S8** Bond lengths [Å] and angles [°] for cs2-13f2.

_____________________________________________________

O(1)-C(2) 1.434(8)

O(1)-H(01) 0.80(7)

O(2)-C(10) 1.371(7)

O(2)-C(13) 1.404(9)

O(3)-C(17) 1.393(7)

O(3)-C(20) 1.422(8)

O(4)-C(27) 1.228(8)

C(1)-C(27) 1.507(9)

C(1)-C(5) 1.532(8)

C(1)-C(2) 1.569(8)

C(1)-H(1) 1.02(5)

C(2)-C(21) 1.525(8)

C(2)-C(3) 1.548(9)

C(3)-C(4) 1.535(9)

C(3)-H(3A) 0.9700

C(3)-H(3B) 0.9700

C(4)-C(14) 1.512(8)

C(4)-C(5) 1.544(8)

C(4)-H(4) 0.99(5)

C(5)-C(7) 1.513(8)

C(5)-H(5) 0.9800

C(7)-C(8) 1.385(9)

C(7)-C(12) 1.385(9)

C(8)-C(9) 1.391(9)

C(8)-H(8) 0.9300

C(9)-C(10) 1.378(9)

C(9)-H(9) 0.9300

C(10)-C(11) 1.373(10)

C(11)-C(12) 1.371(8)

C(11)-H(11) 0.9300

C(12)-H(12) 0.9300

C(13)-H(13A) 0.9600

C(13)-H(13B) 0.9600

C(13)-H(13C) 0.9600

C(14)-C(15) 1.365(9)

C(14)-C(19) 1.380(9)

C(15)-C(16) 1.392(9)

C(15)-H(15) 0.9300

C(16)-C(17) 1.381(10)

C(16)-H(16) 0.9300

C(17)-C(18) 1.380(10)

C(18)-C(19) 1.387(9)

C(18)-H(18) 0.9300

C(19)-H(19) 0.9300

C(20)-H(20A) 0.9600

C(20)-H(20B) 0.9600

C(20)-H(20C) 0.9600

C(21)-C(22) 1.380(10)

C(21)-C(26) 1.390(9)

C(22)-C(23) 1.384(9)

C(22)-H(22) 0.9300

C(23)-C(24) 1.371(11)

C(23)-H(23) 0.9300

C(24)-C(25) 1.359(12)

C(24)-H(24) 0.9300

C(25)-C(26) 1.389(10)

C(25)-H(25) 0.9300

C(26)-H(26) 0.9300

C(27)-C(28) 1.498(8)

C(29)-C(28) 1.381(9)

C(29)-C(30) 1.388(9)

C(29)-H(29) 0.9300

C(30)-C(31) 1.372(10)

C(30)-H(30) 0.9300

C(31)-C(32) 1.359(10)

C(31)-H(31) 0.9300

C(32)-C(33) 1.378(9)

C(32)-H(32) 0.9300

C(33)-C(28) 1.393(9)

C(33)-H(33) 0.9300

C(2)-O(1)-H(01) 105(8)

C(10)-O(2)-C(13) 118.3(6)

C(17)-O(3)-C(20) 117.3(5)

C(27)-C(1)-C(5) 113.9(5)

C(27)-C(1)-C(2) 114.1(5)

C(5)-C(1)-C(2) 103.2(5)

C(27)-C(1)-H(1) 109(2)

C(5)-C(1)-H(1) 106(2)

C(2)-C(1)-H(1) 110(3)

O(1)-C(2)-C(21) 111.6(5)

O(1)-C(2)-C(3) 110.7(5)

C(21)-C(2)-C(3) 114.4(5)

O(1)-C(2)-C(1) 104.0(5)

C(21)-C(2)-C(1) 112.6(5)

C(3)-C(2)-C(1) 102.8(5)

C(4)-C(3)-C(2) 108.3(5)

C(4)-C(3)-H(3A) 110.0

C(2)-C(3)-H(3A) 110.0

C(4)-C(3)-H(3B) 110.0

C(2)-C(3)-H(3B) 110.0

H(3A)-C(3)-H(3B) 108.4

C(14)-C(4)-C(3) 115.9(5)

C(14)-C(4)-C(5) 114.6(5)

C(3)-C(4)-C(5) 103.3(5)

C(14)-C(4)-H(4) 109(3)

C(3)-C(4)-H(4) 110(3)

C(5)-C(4)-H(4) 103(3)

C(7)-C(5)-C(1) 115.0(5)

C(7)-C(5)-C(4) 115.7(6)

C(1)-C(5)-C(4) 101.9(5)

C(7)-C(5)-H(5) 107.9

C(1)-C(5)-H(5) 107.9

C(4)-C(5)-H(5) 107.9

C(8)-C(7)-C(12) 116.5(6)

C(8)-C(7)-C(5) 122.1(6)

C(12)-C(7)-C(5) 121.4(6)

C(7)-C(8)-C(9) 122.3(6)

C(7)-C(8)-H(8) 118.8

C(9)-C(8)-H(8) 118.8

C(10)-C(9)-C(8) 119.4(6)

C(10)-C(9)-H(9) 120.3

C(8)-C(9)-H(9) 120.3

O(2)-C(10)-C(11) 116.4(6)

O(2)-C(10)-C(9) 124.7(6)

C(11)-C(10)-C(9) 118.9(6)

C(12)-C(11)-C(10) 121.1(7)

C(12)-C(11)-H(11) 119.4

C(10)-C(11)-H(11) 119.4

C(11)-C(12)-C(7) 121.7(7)

C(11)-C(12)-H(12) 119.2

C(7)-C(12)-H(12) 119.2

O(2)-C(13)-H(13A) 109.5

O(2)-C(13)-H(13B) 109.5

H(13A)-C(13)-H(13B) 109.5

O(2)-C(13)-H(13C) 109.5

H(13A)-C(13)-H(13C) 109.5

H(13B)-C(13)-H(13C) 109.5

C(15)-C(14)-C(19) 118.2(6)

C(15)-C(14)-C(4) 119.5(6)

C(19)-C(14)-C(4) 122.3(6)

C(14)-C(15)-C(16) 122.7(6)

C(14)-C(15)-H(15) 118.7

C(16)-C(15)-H(15) 118.7

C(17)-C(16)-C(15) 118.1(7)

C(17)-C(16)-H(16) 120.9

C(15)-C(16)-H(16) 120.9

C(18)-C(17)-C(16) 120.2(6)

C(18)-C(17)-O(3) 115.7(7)

C(16)-C(17)-O(3) 124.1(7)

C(17)-C(18)-C(19) 120.0(7)

C(17)-C(18)-H(18) 120.0

C(19)-C(18)-H(18) 120.0

C(14)-C(19)-C(18) 120.6(7)

C(14)-C(19)-H(19) 119.7

C(18)-C(19)-H(19) 119.7

O(3)-C(20)-H(20A) 109.5

O(3)-C(20)-H(20B) 109.5

H(20A)-C(20)-H(20B) 109.5

O(3)-C(20)-H(20C) 109.5

H(20A)-C(20)-H(20C) 109.5

H(20B)-C(20)-H(20C) 109.5

C(22)-C(21)-C(26) 118.0(6)

C(22)-C(21)-C(2) 120.7(6)

C(26)-C(21)-C(2) 121.0(6)

C(21)-C(22)-C(23) 120.5(7)

C(21)-C(22)-H(22) 119.7

C(23)-C(22)-H(22) 119.7

C(24)-C(23)-C(22) 120.8(8)

C(24)-C(23)-H(23) 119.6

C(22)-C(23)-H(23) 119.6

C(25)-C(24)-C(23) 119.4(8)

C(25)-C(24)-H(24) 120.3

C(23)-C(24)-H(24) 120.3

C(24)-C(25)-C(26) 120.6(8)

C(24)-C(25)-H(25) 119.7

C(26)-C(25)-H(25) 119.7

C(25)-C(26)-C(21) 120.6(7)

C(25)-C(26)-H(26) 119.7

C(21)-C(26)-H(26) 119.7

O(4)-C(27)-C(28) 118.7(6)

O(4)-C(27)-C(1) 118.9(6)

C(28)-C(27)-C(1) 122.4(6)

C(28)-C(29)-C(30) 119.9(7)

C(28)-C(29)-H(29) 120.1

C(30)-C(29)-H(29) 120.1

C(31)-C(30)-C(29) 120.1(7)

C(31)-C(30)-H(30) 119.9

C(29)-C(30)-H(30) 119.9

C(32)-C(31)-C(30) 120.5(6)

C(32)-C(31)-H(31) 119.8

C(30)-C(31)-H(31) 119.8

C(31)-C(32)-C(33) 120.2(7)

C(31)-C(32)-H(32) 119.9

C(33)-C(32)-H(32) 119.9

C(32)-C(33)-C(28) 120.3(6)

C(32)-C(33)-H(33) 119.8

C(28)-C(33)-H(33) 119.8

C(29)-C(28)-C(33) 119.0(6)

C(29)-C(28)-C(27) 119.1(6)

C(33)-C(28)-C(27) 121.9(6)

_____________________________________________________________

**Table S9** Anisotropic displacement parameters (Å2x 103) for cs2-13f2. The anisotropic

displacement factor exponent takes the form: -22[ h2a*2U11 + ... + 2 h k a* b* U12 ].

______________________________________________________________________________

U11 U22 U33 U23 U13 U12

______________________________________________________________________________

O(1) 65(3) 28(3) 35(3) -6(2) 5(2) -9(3)

O(2) 45(3) 74(4) 46(3) -17(3) 21(2) -14(3)

O(3) 33(2) 60(4) 40(2) 1(3) -2(2) 6(3)

O(4) 47(3) 35(3) 55(3) 4(2) -1(2) -19(3)

C(1) 33(3) 25(4) 32(3) -1(3) 1(3) -7(3)

C(2) 39(4) 30(4) 33(3) -1(3) 5(3) -2(3)

C(3) 41(4) 42(4) 36(3) 7(3) 2(3) -10(4)

C(4) 39(4) 38(4) 26(3) -2(3) 0(3) -11(3)

C(5) 32(3) 34(4) 33(3) 2(3) 2(3) -9(3)

C(7) 32(3) 40(4) 28(3) 0(3) -1(3) -2(3)

C(8) 53(4) 34(5) 50(4) -6(4) 15(3) -11(4)

C(9) 49(4) 36(4) 42(4) -13(4) 7(3) -10(4)

C(10) 26(3) 47(5) 40(4) -7(4) 7(3) 0(3)

C(11) 35(4) 54(5) 54(4) -14(4) 18(3) -20(4)

C(12) 32(4) 48(5) 47(4) -9(4) 7(3) -13(4)

C(13) 61(5) 70(6) 54(4) -16(5) 29(4) -2(5)

C(14) 35(4) 26(4) 32(3) -4(3) 3(3) 4(3)

C(15) 49(4) 36(4) 37(4) -6(4) -3(3) 1(4)

C(16) 53(5) 33(4) 44(4) -6(4) 4(3) 15(4)

C(17) 36(4) 48(5) 32(3) 8(4) 4(3) 0(4)

C(18) 51(4) 35(4) 48(4) -6(4) -7(4) 2(4)

C(19) 50(4) 34(4) 45(4) -7(4) -5(3) 3(4)

C(20) 40(4) 83(7) 52(4) -7(5) 0(3) 24(5)

C(21) 40(4) 41(4) 25(3) 6(3) 5(3) 0(4)

C(22) 34(4) 35(4) 44(4) 10(4) 10(3) -2(3)

C(23) 52(5) 46(5) 49(4) 14(4) 5(4) -18(4)

C(24) 40(5) 83(7) 68(5) 26(6) 8(4) -12(5)

C(25) 38(4) 69(7) 67(5) 8(5) 19(4) 17(4)

C(26) 44(4) 38(5) 49(4) 4(4) 16(3) 7(4)

C(27) 42(4) 30(4) 27(3) -1(3) 6(3) 0(4)

C(29) 42(4) 35(4) 41(4) 0(4) 2(3) 1(4)

C(30) 62(5) 37(5) 51(4) 16(4) 10(4) 6(4)

C(31) 40(4) 57(6) 42(4) 8(4) -2(3) 8(4)

C(32) 39(4) 42(5) 42(4) 6(4) -1(3) -7(4)

C(33) 42(4) 28(4) 33(3) 4(3) 7(3) 2(3)

C(28) 39(4) 26(4) 31(3) 2(3) 12(3) -5(3)

______________________________________________________________________________

**Table S10**  Hydrogen coordinates ( x 104) and isotropic displacement parameters (Å2x 103) for cs2-13f2.

______________________________________________________________________________

x y z U(eq)

______________________________________________________________________________

H(3A) 2639 8663 6220 40(13)

H(3B) 1984 6621 5827 40(13)

H(5) 949 4450 6994 41(19)

H(8) 1119 8927 8295 47(14)

H(9) -5 9281 9259 47(14)

H(11) -1619 3615 8653 54(15)

H(12) -525 3304 7692 54(15)

H(13A) -2197 8234 10394 79(15)

H(13B) -1670 9638 9791 79(15)

H(13C) -829 8375 10389 79(15)

H(15) -289 11046 6613 58(16)

H(16) -2135 11586 5968 58(16)

H(18) -1878 5619 5043 58(16)

H(19) -34 5154 5692 58(16)

H(20A) -4805 10328 4907 60(13)

H(20B) -3715 11875 5110 60(13)

H(20C) -4181 10392 5716 60(13)

H(22) 4065 9609 7151 49(9)

H(23) 6004 10573 7489 49(9)

H(24) 7496 8114 7349 49(9)

H(25) 7046 4644 6901 49(9)

H(26) 5106 3566 6623 49(9)

H(29) 3729 194 8772 46(9)

H(30) 5480 -150 9541 46(9)

H(31) 6777 2765 9689 46(9)

H(32) 6323 6060 9114 46(9)

H(33) 4571 6473 8364 46(9)

H(1) 2760(40) 6920(80) 7830(20) 4(12)

H(4) 1330(40) 9040(90) 7040(30) 15(14)

H(01) 3020(70) 3620(170) 6050(40) 80(30)

______________________________________________________________________________


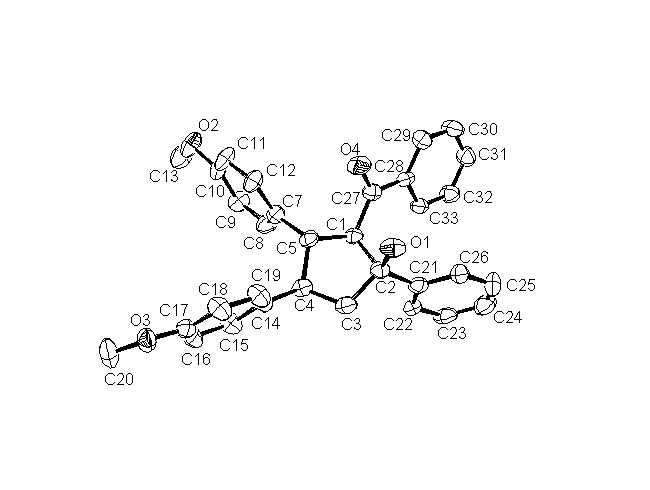


**Fig. S2** Structure and atomic numbering of cs2-13f2.
